# Supplementary material for: Functional impact of global rare copy number variation in autism spectrum disorders
Source: Springer Nature journal article supplement (doi:10.1038/nature09146), 2010-06-08
Supplement: 41586_2010_BFnature09146_MOESM314_ESM.pdf [file 41586_2010_BFnature09146_MOESM314_ESM.pdf]

## SUPPLEMENTARY INFORMATION

**CONTENTS**

|                                                                                      |           |
|--------------------------------------------------------------------------------------|-----------|
| <b>A. AUTISM SPECTRUM DISORDER (ASD) SAMPLE AND CONTROL COLLECTIONS</b>              | <b>4</b>  |
| ASD samples                                                                          | 4         |
| Control cohorts                                                                      | 4         |
| <b>B. GENOTYPING AND DATA CLEANING</b>                                               | <b>6</b>  |
| SNP quality control                                                                  | 6         |
| Intensity quality control for CNV detection                                          | 6         |
| <b>C. CNV DETECTION AND QUALITY CONTROL EVALUATION</b>                               | <b>7</b>  |
| Pilot experiment to evaluate the quality of detected stringent CNVs                  | 8         |
| <b>D. CNV VERIFICATION</b>                                                           | <b>9</b>  |
| Confirmation using computational methods                                             | 9         |
| Experimental CNV validation                                                          | 9         |
| <b>E. RARE CNV BURDEN ANALYSIS</b>                                                   | <b>11</b> |
| CNV global burden analysis                                                           | 12        |
| CNV Region (CNVR) burden analysis                                                    | 12        |
| CNV-based gene association test                                                      | 13        |
| Burden analysis for genes known to be implicated in ASD and/ or ID                   | 13        |
| Population attributable risk                                                         | 13        |
| <b>F. GENE-SET ENRICHMENT AND FUNCTIONAL MAP</b>                                     | <b>14</b> |
| Analytical synopsis                                                                  | 14        |
| Deriving gene sets                                                                   | 14        |
| Gene-set enrichment test                                                             | 15        |
| Cryptic bias                                                                         | 15        |
| Network visualization of gene-sets enriched for deletions: functional enrichment map | 15        |
| Expanded functional map between deletion-enriched gene sets & known ASD/ID genes     | 16        |
| <b>G. SUPPLEMENTARY FIGURES AND TABLES</b>                                           | <b>18</b> |
| <b>H. ACKNOWLEDGEMENTS</b>                                                           | <b>72</b> |
| <b>I. SUPPLEMENTARY REFERENCES</b>                                                   | <b>73</b> |

**LIST OF FIGURES**

|                                                                                          |    |
|------------------------------------------------------------------------------------------|----|
| Figure 1. Quality control and analysis flow chart                                        | 19 |
| Figure 2. Results from ancestry analysis using genome-wide genotype data                 | 20 |
| Figure 3. Global CNV measures for blood versus cell-line DNA-derived samples             | 21 |
| Figure 4. Examples of CNVs overlapping ASD candidate genes or loci                       | 22 |
| Figure 5. Number of enriched gene-sets at different FDR q-value thresholds               | 26 |
| Figure 6. Overview of all enriched gene-sets in deletions                                | 27 |
| Figure 7. Detailed annotation of the main enriched clusters                              | 28 |
| Figure 8. Control for bias in length and number of deletions                             | 29 |
| Figure 9. Bias control for genome proximity                                              | 31 |
| Figure 10. Distribution of q-values per gene-set                                         | 32 |
| Figure 11. Gene coverage between ASD and/or ID gene-sets and sets enriched for deletions | 33 |
| Figure 12: Expanded functional map with high-level of annotation detail                  | 34 |

**LIST OF TABLES**

|                                                                                     |    |
|-------------------------------------------------------------------------------------|----|
| Table 1. Quality control (QC) steps for CNV analysis of ASD cases and controls      | 35 |
| Table 2. Chromosome abnormalities larger than 7.5 Mb detected during QC             | 36 |
| Table 3: Summary of characteristics of stringent CNVs in cases and controls         | 38 |
| Table 4. Characteristics of rare CNVs in European ASD probands and controls         | 39 |
| Table 5. Global rare CNV burden analyzes with respect to CNV size and CNV rate      | 42 |
| Table 6. Examples of ASD candidate genes or loci                                    | 43 |
| Table 7. Rare CNVs confirmed experimentally                                         | 44 |
| Table 8. Rare CNVs in 996 ASD cases                                                 | 60 |
| Table 9. List of known ASD genes, ID genes, and ASD-candidates                      | 61 |
| Table 10. Clinically-relevant findings                                              | 66 |
| Table 11. Population attributable risk (PAR)                                        | 69 |
| Table 12. Number of analyzed gene-sets in the functional map enriched for deletions | 70 |
| Table 13. List of gene-sets enriched for deletions                                  | 71 |

## A. AUTISM SPECTRUM DISORDER (ASD) SAMPLE AND CONTROL COLLECTIONS

### ASD samples

In an ongoing effort, the international Autism Genome Project (AGP) Consortium is collecting ASD families for ongoing genetic studies. The first phase of this initiative involved examining genetic linkage and chromosomal rearrangements in 1,168 families having at least two ASD individuals<sup>1</sup>. In this second phase of the project, we collected more families and genotyped them to examine for CNVs and SNPs affecting risk for ASD. Here, we present the analysis of rare CNVs, which is outlined in Fig. 1 in the main text. As discussed, 1,275 ASD cases (or 1,256 cases with both parents) were available for genotyping for our study (Fig.1). DNA was obtained from blood (63%), buccal-swabs (10%) or cell-lines (22%) (in 5% the DNA source was not available). The Autism Diagnostic Interview-Revised (ADI-R)<sup>2</sup> and Autism Diagnostic Observation Schedule (ADOS)<sup>3</sup> were used for research diagnostic classification. Subjects with previously known karyotypic abnormalities or other genetic disorders associated with ASD were excluded.

Our ascertainment of ASD cases was based on the following criteria. Affected subjects were grouped in three classes (strict, broad and spectrum ASD) based on proband diagnostic measures. To qualify for the strict class, affected individuals met criteria for autism on both primary instruments, the ADI-R and the ADOS. The broad class included individuals who met ADI-R criteria for autism and ADOS criteria for ASD, but not autism, or vice versa. ADI-R-based diagnostic classification of subjects as ASD followed criteria published by Risi *et al.*<sup>4</sup>. Specifically, individuals who almost met ADI criteria for autism were classified as ASD if (1) they met criteria on social and either communication or repetitive behavior domains; or (2) met criteria on social and within 2 points of criteria for communication, or met criteria on communication and within 2 points of social criteria, or within 1 point on both social and communication domains<sup>4</sup>. Finally, the spectrum class included all individuals who were classified as ASD on both the ADI-R and ADOS or who were not evaluated on one of the instruments but were diagnosed with autism on the other instrument. Subjects from all classifications (strict, broad, and spectrum) were included in the CNV analysis.

Family-history reports were taken to inform on the family type. Multiplex (MPX) families had at least two individuals receiving validated ASDs diagnoses who were first to third degree relatives (for third degree, only considered cousins). This included families with affected dizygotic twins. Simplex (SPX) families had only one known individual with ASD in first to third (cousin) degree relatives. Families with only affected monozygotic twins were considered SPX. Unknown (UKN) families were any families that did not fall into the MPX or SPX criteria above. Given the international and multi-site nature of the project and range of chronological and mental age of the probands, a range of cognitive tests were administered, and standard scores were combined across tests to provide consolidated IQ estimates.

### Control cohorts

Our primary considerations for selecting control groups for the genome-wide CNV comparison studies included using individuals with no obvious psychiatric history that were ancestrally matched samples to minimize potential confounds, and that were genotyped on the same Illumina 1M platform used for genotyping cases. It was not possible under these circumstances to control for age. Wherever possible we also considered and controlled for influences of sample source (eg. blood or cell line DNA), DNA preparation methods and experimental batch effects. We note that at the time of initiation, this project was one of the first large-scale projects to use the high-resolution Illumina Infinium 1M-single SNP microarray and this needed to be considered in our planning.

Two control groups, both genotyped with Illumina Human 1M-single BeadChip arrays, were assembled and used in the primary analysis: subjects from the Study on Addiction: Genetics and Environment (SAGE) and from HapMap CEPH Utah (HapMap CEU).

1. *SAGE cohort*: 1,880 control subjects from the larger SAGE case-control study<sup>5</sup> were made available. The consented sample included 31% males and 69% of females, with mean age of 39.2 (SD 9.1) and 73% of subjects self-identified as European-American, 26% as African-American and 1% as other ([http://zork.wustl.edu/gei/study\\_description.htm](http://zork.wustl.edu/gei/study_description.htm)). Both raw intensities and genotypes were obtained from NHGRI-dbGaP ([http://www.ncbi.nlm.nih.gov/projects/gap/cgi-bin/study.cgi?study\\_id=phs000092.v1.p1](http://www.ncbi.nlm.nih.gov/projects/gap/cgi-bin/study.cgi?study_id=phs000092.v1.p1)). The SAGE control subjects may have had exposure to alcohol (and possibly to other drugs), but did not meet criteria for alcohol or other drug dependence. The sub-set of control dataset used in the specific CNV analyses in this paper is composed of 1,287 unrelated European control samples that passed all quality control filters (75% had DNA extracted from whole blood and 25% had DNA extracted from cell lines).

2. *HapMap CEU*: data from 120 samples were obtained directly from Illumina. Data from 26 HapMap CEU samples that passed all quality control filters were used in the CNV analysis. Experiments followed the same quality control procedures as applied to the ASD family samples and SAGE controls.

To further evaluate specific CNVs identified in the primary analysis as potential risk factors in ASD (Supplementary Table 6), we tested them against an additional 3,677 European controls. These controls were selected because we had previous experience in using them in CNV comparison studies. As discussed below, while this data comes from other microarray platforms, we were able to use established methods to compare presence or absence of a particular CNV at a given locus:

1. *Coronary artery disease case-control GWAS study*: This “Ottawa Heart Institute (OHI)” study<sup>6</sup> was undertaken in the Ottawa valley population, province of Ontario, Canada. DNA samples were all extracted from whole blood. Both raw intensities and genotypes were obtained directly from the authors of the study. We used CNV data from 1,234 unrelated controls, genotyped with the Affymetrix Genome-Wide Human SNP 6.0 array, which were analyzed using two algorithms Birdsuite<sup>7</sup> and iPattern<sup>8</sup>. CNVs detected by both algorithms were used to define a stringent set of CNVs, in which CNVs detected in a subject by both algorithms were merged using the outside probe boundaries of the union of those CNVs. The control dataset used in the CNV analysis was composed of 53.7% of female and 46.3% male samples that passed quality control.

2. *PopGen study*<sup>9</sup>: 1,123 European control subjects were assembled from the PopGen study and genotyped with the Affymetrix Genome-Wide Human SNP 6.0 array. The data were analyzed for CNVs in the same way for as the OHI dataset (see above). All DNA samples were all extracted from whole blood.

3. *CHOP study*: 1,320 European control subjects routinely seen at primary care and well-child clinic practices within the Children's Hospital of Philadelphia (CHOP) Health Care were genotyped with Illumina 550K BeadChip and analyzed using the circular binary segmentation method<sup>10</sup>. We used the CNV data as listed in the Database of Genomic Variants (ie. CNVs found in two or more samples were merged to obtain a stringent set of CNVs).

## B. GENOTYPING AND DATA CLEANING

Samples were genotyped using the Illumina 1M-single array, and we performed stringent, uniform quality control (QC) procedures on the resulting data. The Illumina 1M-single Infinium BeadChip contains a total of 1,072,820 markers (50-mer probes) for SNP and CNV analyses. Samples were processed using the manufacturer's recommended protocol with no modifications for Infinium II arrays, and BeadChips were scanned on the Illumina BeadArray Reader using default settings. Analysis and intra-chip normalization were performed using Illumina's BeadStudio software v.3.3.7, with a GenCall cutoff of 0.1. Built-in controls, both sample independent (including staining controls, extension controls, target removal controls, and hybridization controls) and sample-dependent (including stringency controls, non-specific binding controls, and non-polymorphic controls), were inspected to assess the quality of the experiment. For genotype calling we followed the manufacturer's protocols<sup>11</sup> and used technical controls. Trios consisting of an affected offspring and both parents were genotyped, and in total genotyping was completed for 1,275 individuals (1,256 complete trios). For the control sample, 1,880 samples were genotyped on the 1M Illumina platform, as described elsewhere ([http://www.ncbi.nlm.nih.gov/projects/gap/cgi-bin/study.cgi?study\\_id=phs000092.v1.p1](http://www.ncbi.nlm.nih.gov/projects/gap/cgi-bin/study.cgi?study_id=phs000092.v1.p1))<sup>5</sup>.

### SNP quality control

QC for individual SNPs was performed at family and individual levels as part of a whole genome association study of ASD<sup>12</sup> (Supplementary Fig. 1). We first assessed gender miscalls based on X chromosome genotypes and allele calls for Y, adjusting gender when appropriate (e.g., miscoding) and dropping samples (e.g., Klinefelter syndrome) or genotypes (e.g., loss of X in cell line) from the X chromosome. We searched the database for duplicate samples using a subset of 5,254 SNPs that were independent and had a >99.9% completion rate for genotypes at this QC stage. Duplicates, and highly-related samples based on identity by state (IBS), from 2 families were removed. Data were subsequently checked for Mendelian errors, and 13 families with large numbers of errors were removed from the analysis. Following this QC step, 1,213 genotyped cases were retained for 1,184 complete trios and 93 parent-child duos (Supplementary Table 1).

Ancestry was then determined for the proband by using 5,239 widely-spaced, independent SNPs that had a genotype completion rate of  $\geq 99.9\%$ . Software used was SpectralGEM<sup>13</sup>, which estimated 5 significant dimensions of ancestry (Supplementary Fig. 2 and unpublished data). Subsequent clustering on dimensions of ancestry resulted in 6 clusters: 3 clusters of European ancestry (EA), and 3 clusters reflecting other major ancestral groups (e.g., African and Asian). We have used only the three clusters of European ancestry for the CNV analyses.

### Intensity quality control for CNV detection

Prior to CNV analyses, QC criteria were applied as outlined in Supplementary Fig. 1. These QC criteria were selected to ensure that ascertainment of CNVs was consistent between cases and parents, to reduce heterogeneity due to varying sample sources and DNA treatment, and to avoid batch effects. To minimize potential intensity batch effects for CNV analysis, we generated a cluster file made of 1,550 samples internal to the project (i.e., mostly parents) that was used to normalize and re-cluster all samples of the project for better CNV calling. This internal cluster file was inspected manually for all markers with GenTrain score <0.6 and markers with low AB R Mean values (i.e., low normalized intensity of the heterozygote cluster) and any edits were validated by two independent raters. The edited cluster was then used to normalize and re-cluster all samples of the project, and to generate genotype calls using a GenCall (Illumina) cutoff score of 0.10. Additional thresholds were set for a variety of QC measures (Supplementary Fig. 1, Supplementary Table 1), and we excluded samples if:

- i) based on the SNP QC (see above): if they were closely related, duplicates, had gender mismatches, Mendelian error rate >1%;
- ii) array call rate <97%;
- iii) cross-sample normalized ratio standard deviation >0.27 (i.e., sample-batch level QC);
- iv) standard deviation for log R ratio values in the autosomes >0.27;
- v) standard deviation of the B Allele Frequency values (i.e., allelic ratios within the 0.25 to 0.75 ranges) >0.13.

### C. CNV DETECTION AND QUALITY CONTROL EVALUATION

For 1,159 autism samples (1,045 trios and 106 duos) and 1,907 controls that passed the above SNP and intensity QC filters, we ran three CNV calling algorithms, namely, QuantiSNP<sup>14</sup>, iPattern<sup>8</sup> and PennCNV<sup>15</sup> to obtain high-confidence call. The required data for CNV analysis, i.e. within-sample normalized fluorescence (ie. X and Y normalized values), between-sample normalized fluorescence (ie. Log R ratios (LRR) and B allele frequency (BAF) values) and genotypes for each sample, were exported directly from Illumina's Beadstudio software. Mitochondrial markers were not used in the CNV analysis.

The objective of using multiple algorithms was to minimize the number of potential false discoveries. CNVs were identified by using QuantiSNP and iPattern, while PennCNV, and specifically its trio option, was used to confirm inheritance status of the resulting CNV calls. Because each of these algorithms employs unique strategies for CNV calling, their strengths can be leveraged to ensure maximum specificity. We note that the lead individuals who developed the QuantiSNP (Jiannis Ragoussis and team), iPattern (Dalila Pinto/ Steve Scherer and team) and PennCNV (Kai Wang and team) algorithms from Oxford, Toronto, and Philadelphia are all co-authors of this study. In our collective experience through this and other projects, these three algorithms currently remain the most reliable for calling CNVs using Illumina 1M data.

iPattern implements a non-parametric density-based clustering model that integrates intensity data across samples to assign individual samples to distinct copy number states. iPattern data pre-processing produces a single one-dimensional summary of the relative intensity of test to reference samples. Specifically, data pre-processing evaluates the background signal to noise ratio for each batch of tested samples, and outliers from the standard deviation of the sample batch are removed. Normalization of chromosome X probes was performed separately for males and females before CNV calling of this chromosome. A two-stage analytical framework is then used to identify CNV regions, with a moving window-based approach followed by secondary boundary refinement. The largest cluster of unrelated samples is dynamically chosen as reference, and samples with higher or lower intensities are assigned as relative CNV gains or losses. CNV lengths were calculated based on the distance between the first and last array probes internal to the variant. QuantiSNP uses an Objective Bayes (OB) Hidden-Markov Model (HMM) approach for CNV calling in which OB measures are used to set hyperparameters (false positive rates) and the copy number state is inferred with an HMM (for details see Colella *et al.*<sup>14</sup>). The PennCNV algorithm uses an HMM to detect CNV from multiple sources of information, including the total signal intensity and allelic intensity ratio at each SNP marker (for details see Wang *et al.*<sup>15</sup>).

We excluded CNVs when they failed stringent quality control criteria: <5 probes and low confidence score log Bayes factor <15; if they resided in regions of extreme GC content (>70%); or if they were within centromere proximal cytobands. We removed samples (Supplementary Table 1) that were outliers with respect to: (1) Excessive number of CNVs detected by either of

the two algorithms – we defined an outlier as the mean plus 3 standard deviations; (2) excessive aggregate length of CNVs (samples with CNVs larger than 7.5 Mb were removed after visual inspected by plotting their intensities and genotype ratios —Supplementary Table 2— these likely correspond to large karyotypic chromosome abnormalities, or cell line artifacts<sup>16</sup>, and were confirmed for most of the cases); and, (3) excessive number of *de novo* CNVs (>5 *de novo* CNVs). All CNVs by any algorithm with size larger than 1 Mb were inspected manually, and all samples that passed all above QC filters were inspected for chromosomes X and Y. A total of 1,132 cases (of which 991 are complete trios, 125 are child-parent duos and 16 are case only) and 1,858 controls passed the above filters.

CNVs detected in one individual with a minimum 5 consecutive probes covering 5 kb of sequence were merged using outside probe boundaries (i.e., union of the CNVs). As a final step, we joined any CNVs that appeared to be artificially split by either of the calling algorithms and also removed any CNVs that spanned known large assembly gaps in hg18 (greater than 200 kb). The final CNV list comprised 18,075 events in 1,132 cases, 41,946 in 2,712 parents, and 34,394 events in 1,858 controls (Supplementary Table 3A). To avoid confounding by ancestry<sup>13,17</sup>, all downstream CNV analyses used EA-only cases and controls. This final sample list comprised 15,583 events in 996 EA cases, 33,704 in 2,196 parents, and 22,573 events in 1,287 European controls (Supplementary Table 3B).

### **Pilot experiment to evaluate the quality of detected stringent CNVs**

We experimentally tested the quality of the stringent CNV calls (i.e. calls by both QuantiSNP and iPattern, each with 5 probes, 5 kb cutoff; see further details regarding stringent CNVs in the main paper) by randomly selecting CNV regions in distinct size ranges, followed by experimental validation using quantitative PCR (qPCR). Four size ranges/bins were considered (<20 kb, 20-50 kb, 51-100 kb, >101 kb) and an equal number of CNV regions from each size bin were initially selected for validation. One initial assay was designed per CNV region and tested in triplicate. If this assay was not validated, two other assays were designed and tested in triplicate. In cases where it was not possible to design a workable qPCR assay for a CNV region (either due to the presence of segmental duplications, repeat elements or SNPs), then that CNV region was excluded and other CNV regions were chosen and tested in a similar manner. In total, 45 regions (90 assays) were tested and 87% (39/45) were validated. The six CNVs that were not validated are due to a combination of false positives (FPs) within the CNV calling step and false negatives (FNs) within the qPCR validation step (see below).

Of the 45 CNVs detected in children, 21 were predicted to be inherited (19 were validated; 90%) while 24 were predicted to be *de novo* (20 were validated; 83%) using child-parent trios. To determine the accuracy of these predictions, additional qPCR was conducted using parental DNA. All 19 validated CNVs that were predicted to be inherited were confirmed to be inherited by qPCR and 16/20 validated CNVs that were predicted to be *de novo* were confirmed to be *de novo*. The other 4 CNVs were found to be inherited, representing FNs in the parents during the CNV calling step.

Upon closer inspection of the FNs and FPs, we found that most of these CNV regions overlap segmental duplications (i.e., blocks >10 kb in size, >95% identity) or were small in size (<30 kb). CNVs overlapping segmental duplications are usually highly polymorphic in the general population<sup>18</sup> and show poor probe coverage in commercial SNP-based arrays. Smaller CNVs are also more likely to have poor probe coverage. As a result, the signal to noise ratio at these CNVs does not allow reliable identification of distinct copy-number classes<sup>19</sup>. Removal of these CNVs then resulted in a validation rate >90% using laboratory techniques. Therefore, we found that



stringent application of quality score thresholds to CNV data substantially reduced false discoveries (FPs and FNs) arising from CNV calling error. To further evaluate if this generalization was valid, we tested an additional 40 predicted CNVs (from the above four size bins) that did not overlap segmental duplications. We observed a validation rate of 95% (38/40), similar to the stringent validation rate above. The lowest level of validation was observed in the 5-20 kb size bin.

Thus, all subsequent analyses described in the main paper were performed using a stringent set of CNVs with less than 50% of their length overlapping segmental duplications,  $\geq 30$  kb in size, and detected by at least 5 probes (median: 25 probes, 25<sup>th</sup> quartile: 6-17 probes). To improve the accuracy of predictions for inherited vs. *de novo* CNVs, additional computational methods were incorporated into CNV verification (see below), and the final compiled inherited status used in downstream analyses (described in the main paper). Finally, we further evaluated for differences in global CNV measures for blood versus cell-line samples and detected no significant differences and no significant differences in global CNV measures were detected for blood versus cell-line samples (Supplementary Fig. 3A).

## D. CNV VERIFICATION

### Confirmation using computational methods

Confirmatory evidence for CNVs was obtained from independent laboratory experiments (including qPCR, standard and long-range PCR, independent microarray platforms), and computational methods. The computational analyses included:

- 1. A third CNV calling method:** PennCNV- trio option<sup>15</sup> was used for further confirmation of the inherited CNV status.
- 2. Proportion of genotype calls to verify deletions** (% of homozygous calls vs. % of heterozygous calls vs. % of “no-calls”): deletions were considered to be verified when  $\geq 90\%$  SNPs were homozygous or “no calls”.
- 3. Verification of *de novo* deletions seen in children:** we used combined evidence from genotype proportions and fold intensity difference between the average intensity in the child-CNV and either parent-CNV. Specifically, deletions were considered to be *de novo* when  $\geq 90\%$  SNPs were homozygous or “no-calls” and the child-CNV average intensity was  $<4$  fold lower than either of the parents.
- 4. Verification of *de novo* duplications seen in children:** duplications were considered to be *de novo* when the child-CNV average intensity was  $>4$  fold higher than either of the parents.
- 5. Visual inspection of chr. X and chr. Y** intensities and genotype ratios B allele frequency for all samples that passed previous QC filters.
- 6. Visual inspection of all CNVs larger than 1 Mb** by plotting their Log R ratios (LRR) and B allele frequencies (BAF). Samples (including ASD trios and controls) that passed all QC filters and showed CNVs larger than 7.5 Mb were further inspected manually by plotting their LRR as well as BAF. A molecular size cutoff of  $>7.5$  Mb was selected to be consistent with large most cytogenetically visible chromosome abnormalities, and they were excluded; they are listed in Supplementary Table 2.

### Experimental CNV validation

Putative *de novo* as well as inherited rare CNV were further confirmed by a qPCR, multiplex ligation-dependent probe amplification (MLPA), long-range PCR and/or independent arrays:

**Quantitative-PCR:** CNV regions were validated by at least two independent assays that showed concordant results in a family trio, using either Sybr-Green (Stratagene), or the Universal Probe

Library (UPL, Roche). For Sybr-Green qPCR, each assay was conducted in triplicate for both target region probe-set and control region probe-sets. Relative levels of region dosage (i.e., ratio for assay-test/assay-control) were determined using both comparative CT method and the standard curve methods as described in the company manuals and a fold-change less than 0.7 (deletion) or greater than 1.25 (duplication) was considered to constitute a true event.

UPL probes were selected using the ProbeFinder v2.45 software (Roche, <http://www.universalprobelibrary.com>). All reactions were performed in triplicate; each 384-well plate included three control samples and three reference genes, as well as a no-template control for each gene. The plate was analyzed with a LightCycler 480 Real-Time PCR system (Roche). Raw data were obtained with the LightCycler 480 software and exported for analysis into the qBase software<sup>20</sup>.

**Multiplex ligation-dependent probe amplification (MLPA):** MLPA probe-sets for CNV validation were purchased from MRC-Holland and used according to the manufacturer's protocols. Electrophoresis of PCR products was performed using an ABI 3730 sequencer (Applied Biosystems). Resulting data were analyzed using GeneMarker 1.70 software (SoftGenetics). After population normalization, the peak height from each sample was compared to a synthetic control, which represents the median of all normal samples in each experiment. Peak heights below 0.75 were considered as deletions and values above 1.3 as duplications.

**Long-range PCR:** Primers were designed using Primer3 (<http://frodo.wi.mit.edu/primer3/input.htm>) adjacent to the maximal deleted region, such that PCR products would only be expected in the presence of the deletion. Long-range PCR was carried out using the BIO-X-ACT long DNA polymerase kit (BIOLINE) or SequalPrep™ Long PCR Kit (Invitrogen), using the manufacturers' suggested protocol. PCR products were resolved using agarose gels and visualized with SYBR Safe DNA gel stain (Invitrogen) and UV illumination.

**Independent microarray experiments:** A CNV was considered confirmed if the CNV detected by the independent array overlapped  $\geq 50\%$  of the length of the CNV detected in the discovery phase. The arrays used were as follows:

**1. Array experiments from samples used in previously published CNV studies:** Affymetrix 500K<sup>21</sup>, Illumina 550K<sup>22,23</sup>, and Affymetrix SNP 5.0<sup>24</sup>.

**2. Illumina 1M-single arrays:** additional Illumina 1M experiments were used in some instances to further examine the transmission of rare variants in families, or to re-genotype an independently obtained DNA sample from ASD cases or parents.

**3. Agilent 1M comparative genomic hybridization (CGH) arrays:** We further evaluated the validation rate for CNVs from a total of 174 of the Canadian samples that were consecutively selected from individuals that carried rare CNVs identified in the discovery phase. Two micrograms of DNA from each sample was arrayed onto genome-wide high-density Agilent 1x 1M CGH arrays (aCGH) following the manufacturer's recommended protocol. Experiments were sex-matched and a pool of 50 Caucasian control samples was used as reference. CNVs were detected using the built-in Aberration Detection Method-2 (ADM-2) algorithm DNA Analytics v.4.0.85 (Agilent Technologies) with threshold set to 5 and nested filter set to 2. At least 5 consecutive probes were utilized to call a CNV (same threshold was used on Illumina arrays). Experiments with poor derivative log ratio spread were repeated (DLRS > 0.2). A total of 2,375 CNVs detected by Illumina arrays were found to have sufficient coverage on the Agilent arrays (at least 5 probes coverage) and were used to evaluate the CNV validation rate.

In our initial analysis, 2,028 (85%) of the 2,375 Illumina CNVs were confirmed by the Agilent arrays. Confirmed CNVs met a minimum reciprocal overlap cutoff of  $\geq 50\%$  of the length of each

CNV from both platforms (Illumina and Agilent). The 347 CNVs (15%) that were not confirmed can be explained by a combination of factors. These include ~10% where a clear difference in probe distribution was seen between the platforms, leading to considerable size disparity between CNVs identified on the Illumina and Agilent arrays. After closer visual inspection, size overestimation or underestimation of CNVs was due to uneven probe distributions. Either case may have resulted in longer Illumina CNVs not meeting minimum overlap cutoffs with shorter Agilent CNVs, or vice-versa. In addition, the other ~5% of CNVs not confirmed by Agilent arrays could be due to false negatives from the Agilent arrays or false positives within the Illumina CNVs. The majority of these non-confirmed CNVs had ~10 or fewer probes spanning the corresponding region on the Agilent array, indicating that these could be enriched for false negatives.

In summary, besides computational verification of CNVs using a combination of methods (PennCNV, genotype proportions, child-parent intensity fold-changes and visual inspection), we further experimentally validated at least 40% of all case-CNVs that includes i) using qPCR for 51 *de novo* CNVs and 271 inherited CNVs (ie. all cases and their two parents were tested with at least 2 assays per CNV region), ii) ~200 Agilent one million feature aCGH microarrays (for 174 cases and 30 parents), and iii) ~80 additional Illumina 1M arrays to further examine family segregation in sibs, or other methods (such as FISH experiments and breakpoint sequencing). Information on the confirmed CNVs is listed in Supplementary Tables 7-8. Supplementary Table 7 lists rare CNVs confirmed experimentally (*de novo* and inherited) and their segregation in sibs, as well as phenotypes, where available. Supplementary Table 8 lists all rare CNVs detected in 996 ASD cases, as well as all types of verification and validation evidence accumulated for these CNVs.

## E. RARE CNV BURDEN ANALYSIS

Stringent CNVs that passed all QC filters ( $\geq 5$  probes,  $\geq 30$  kb size) were considered rare if they were found at a frequency  $\leq 1\%$  of the total sample set (2,283 subjects) and did not overlap, with  $>50\%$  of its length, a CNV found at a frequency  $>1\%$ . This resulted in a total of 5,478 rare stringent CNVs.

Supplementary Table 4A gives an overview of the characteristics of rare CNVs in ASD cases and controls. The average CNV size in ASD cases was 182.7 kb, the median number of CNVs per individual was 2, and 51.6% were deletions. We found 1.8% of ASD CNVs to be  $>1$  Mb, and 43.7% were between 100 and 999 kb. We observed that the distributions of specific rare CNVs are similar in cases and controls for measures such as CNV size, number and proportion of duplications vs. controls.

We further examined parent-child transmission. Inheritance status was estimated for CNVs detected in 876 probands from complete trios where array data after QC was available from both parents. Using computational data only, the rate of *de novo* CNV events was initially estimated to be 6.9% (165/2,382) with 13.6% (119/876) of trio families having at least one putative *de novo* CNV. When additional computational and laboratory validation data (see section D. CNV verification) was added, we confirmed that at least 5.6% (49/876) of trio families carried at least one *de novo* CNV (average of 1.1 verified *de novo* CNVs/sample) (Supplementary Table 4A). By taking the family type into account, Supplementary Tables 4B and 4C list the summary characteristics of *de novo* rare CNVs and inherited CNVs, respectively, in multiplex (MPX) and simplex (SPX) families. No significant differences were found.

### CNV global burden analysis

Global burden analyses for rare CNVs were performed using PLINK v1.07<sup>25</sup> and scripts developed in-house. A total of 5,478 rare stringent CNVs in a total sample set of 2,283 was used in the analyses. We tested for global increased burden in 996 cases compared to 1,287 controls for three measures: CNV rate, CNV size (Supplementary Table 5) and the average number of genes affected by CNVs (gene-count) (Table 1, main text).

CNV rate was evaluated in two ways, by the number of CNVs per sample and the proportion of samples with one or more CNVs. The CNV size was assessed as both the total genomic segment covered by CNVs, as well as the average CNV size (Supplementary Table 5).

Gene-count evaluated the average number of genes intersected by CNVs per case compared to that for control sample (Table 1, main text). Case-control contrasts were assessed using an adaptive permutation procedure for statistical significance of one-sided tests (i.e., hypothesizing that cases will show greater burden of rare CNVs than controls). For each of 100,000 permutations samples were randomly reassigned either case or control status. Genic regions were identified based on RefSeq annotations (UCSC, v. April 2009, NCBI v36, hg18) and defined by the outermost boundaries of the full set of transcript isoforms. Gene boundaries were extended with a 10 kb flanking region on either side, or to half the distance to the next neighboring gene when the 10 kb flanking regions of neighboring genes overlapped. To account for a potential bias in the global CNV rate and size between cases and controls, we also repeated the same test while controlling for these parameters using logistic regression (PLINK<sup>25</sup> and R stats). In a similar manner we also analyzed subsets of rare CNVs, deletions-only and duplications-only, separately.

We further explored subsets of rare CNVs in two additional frequency ranges: 2-6 occurrences and single-occurrences. Single occurrences were defined as CNVs that did not overlap any other CNVs in the dataset for more than 50% of their length. We also assessed duplications and deletions independently in the same frequency ranges. For these specific sets, deletions were considered as single occurrences even if they overlapped a duplication for more than 50%, and vice versa. Therefore, the number of single-occurrence deletions and duplications do not sum to the number of single-occurrence CNVs in the frequency filtered sets that consider both CNV types (see Table 1, main text and Supplementary Table 5). The set with 2-6 occurrences was obtained by selecting all rare CNVs that overlapped 6 or fewer other CNVs by at least 50% of their length, and subsequently removing CNVs that met the definition of single-occurrence. In Table 1 of the main paper, in total we found 1,419 single-occurrence genic CNVs (880 deletions and 896 duplications) and 1,831 genic CNVs (1,094 deletions and 977 duplications) in the 2-6 frequency range.

### CNV Region (CNVR) burden analysis

We also tested for increased global burden of rare CNV regions (CNVRs) in cases compared to controls. Here, 2,181 non-redundant CNVRs were constructed by merging overlapping rare CNVs present in the total sample of cases and controls (n=2,283 samples) and taking the outermost boundaries of the union of those CNVs. Statistical significance for each gene or CNVR was assessed by Fisher's exact test. From these analyses, CNVR at *DDX53/PTCHD1* emerged as a significant ASD risk factor ( $P = 3.1 \times 10^{-3}$  for the initial 1,287 EA controls). Specifically, we observed 7 ASD male cases with overlapping deletions at *DDX53/PTCHD1* (Xp22.1) and no CNVs were observed at this locus for the initial 1,287 controls (Supplementary Figure 4). We further inspected an additional set of 3,677 European controls amassed from three independent cohorts and none of them showed CNVs at this locus ( $P = 3.57 \times 10^{-6}$  for the 4,964 combined controls (Supplementary Table 6). This result would be significant after Bonferroni correction for the total number of 2,181 CNVRs.

### CNV-based gene association test

In Supplementary Table 6, we list examples of ASD candidate genes or loci identified by *de novo* and rare-inherited CNVs. Examples of novel ASD loci include *SHANK2*, *SYNGAP1*, and *DLGAP2* based on the observation that *de novo* CNV affects these genes in cases but not controls. Also, a combination of rare *de novo* and inherited CNVs affecting *NRXN1*, *IL1RAPL1*, *DMD*, and the DiGeorge 22q11.2 region in ASD cases replicate previous findings for these genes implicated in ASD<sup>1</sup>, X-linked nonsyndromic ID and ASD<sup>26</sup>, Duchenne and Becker muscular dystrophy associated with ASD/ID<sup>27</sup>, and an established genomic disorder, respectively. We tested for specific hypothesis to identify regions associated with ASD. Significance was assessed using Fisher's exact test. Genic regions including 10 kb flanking regions were defined as previously described.

### Burden analysis for genes known to be implicated in ASD and/ or ID

Through extensive review of the literature<sup>28</sup> and further scrutinizing of all available databases (up to December 2009), we compiled lists of genes previously described as being implicated in ASD and ID ('expert-curated' lists), and a third list of candidates for ASD (Supplementary Table 9):

- ASD-implicated: 36 genes and 10 loci strongly implicated in ASD and identified in subjects with ASD or ASD and ID;
- Intellectual disability (ID): 110 genes and 17 loci known to be implicated in ID but not yet in ASD;
- ASD candidates: 103 genes drawn from previous studies of common and rare variants for ASD. They include case reports of cytogenetic abnormalities, allelic association and CNV studies.

To select for CNVs with maximal impact, CNVs needed to intersect genes, or overlap loci (such as genomic disorder loci 1q21.1, 22q11.2) by an arbitrary cutoff of 50% or more of their total length. Linear logistic regression was used to specifically test for an increased CNV rate in cases vs. controls for the three different gene lists or combinations thereof. In this analysis, phenotype was regressed on the number of genes intersected by one or more CNVs, and significance was assessed by permutation with 100,000 iterations, where the phenotype assignment (cases/control status) was randomized. Beta values were exponentiated and odds ratios and corresponding 95% confidence intervals were obtained using the R statistics package 2.10.0 (<http://www.r-project.org/>).

We also repeated the analysis after manual inspection (i.e., not using an arbitrary cutoff) and eliminated CNVs less likely to be pathogenic, such as events that fall outside the critical region of overlap with genomic disorders loci, intronic CNVs in *NRXN1*, heterozygous CNVs disrupting autosomal recessive loci, X-linked genes in females inherited from non-ASD fathers, and duplications inherited from non-ASD parents. A list of clinically relevant CNVs is provided as Supplementary Table 10.

### Population attributable risk

To determine the fraction (%) of ASD cases that can be attributed to rare CNVs affecting the combined list of ASD and ID genes/loci we calculated the population attributable risk (PAR) as follows:

$PAR = P(A) \cdot (R-1) / [1 + P(A) \cdot (R-1)]$ , in which:

$P(A)$  = exposure to selected rare CNVs, which was estimated from the frequency in controls, and  $R$  = the relative risk for ASD, which was estimated from the odds ratio.

Because ASD is relatively rare, the odds ratio is a good substitute for the relative risk and the observed frequency in controls is a reasonable estimate for  $P(A)$ . Results are listed in Supplementary Table 11.

## F. GENE-SET ENRICHMENT AND FUNCTIONAL MAP

### Analytical synopsis

Gene-set enrichment analysis has been proposed as a means to identify biologically meaningful groups of genes having an impact on risk for disease and other phenotypes. Our analyses build on the work of Subramanian *et al.*<sup>29</sup>, who develop a heuristic Benjamini and Hochberg's (1995)<sup>30</sup> false discovery rate (FDR) procedure for enrichment analysis of gene expression data. For a given threshold  $t$ , the FDR is defined as the expected fraction of false positive  $P$ -values  $\leq t$  divided by the fraction of the total  $P$ -values  $\leq t$ . Gene sets are not necessarily independent because genes fall in more than one gene set. This dependency makes it challenging to estimate the numerator of the FDR. Subramanian *et al.*<sup>29</sup> assume that this quantity can be estimated by permutation of case-control status and re-analysis of the data under the null hypothesis. If this procedure is performed sufficient times (e.g., 1000 in their case) the resulting sets of  $P$ -values is presumed to be a reasonable approximation to the null distribution of the  $P$ -values, which can then be used to estimate the numerator for a given  $t$ . The denominator is the fraction of  $P$ -values  $\leq t$  in the real data. Another related quantity is used in our analyses, the FDR  $q$ -value, which for an individual hypothesis test is the minimum FDR at which the test would be called significant<sup>31,32</sup>. For brevity we shall refer to the FDR  $q$ -value as the  $q$ -value.

Because we analyze data on rare events, specifically rare deletion CNVs overlapping genes, we use the Fisher's exact test (FET) to assess which gene-sets are more frequently affected by CNV events in cases compared to controls. Contrasting case and control CNV distributions focuses attention on gene sets most likely to be relevant to risk for autism. Following Subramanian *et al.*<sup>29</sup> to generate a null distribution of  $P$ -values, we permute case-control status sufficiently so that CNV events and case-control status are independent and then analyze the distribution of CNVs in cases and controls, by gene set, using FET. We performed this procedure 2000 times to build a distribution of  $P$ -values under the null hypothesis. Permuting case-control labels has the benefit of maintaining the correlation of genes within sets as well as the correlation of CNV prevalence on genes. When the case/control status permutation is used to construct the null hypothesis distribution, the enrichment test belongs to the category of *self-contained* tests. In contrast, the usual application of FET to enrichment analysis, where an experimental gene-set is tested for overlap with functional gene-sets, as well as other enrichment methods relying on gene label permutations, belong to the *competitive* category of tests. More details on this difference can be found in Dinu *et al.*<sup>33</sup>.

### Deriving gene sets

Gene-sets were derived from the following resources (Supplementary Table 12): Gene Ontology (Biological Process, Molecular Function, and Cellular Component), NCI Pathways, KEGG Pathways, Reactome, PFAM protein domain families. Gene Ontology, KEGG and PFAM were downloaded from Bioconductor/R packages (org.Hs.eg.db, KEGG.db, GO.db); NCI pathways were directly downloaded from the NCI Pathway Interaction Database web site (<http://pid.nci.nih.gov/>); gene IDs were converted from Uniprot to EntrezGene using Bioconductor/R annotation packages (org.Hs.eg.db). Top-level Reactome pathways were downloaded from the Reactome web site (<http://www.reactome.org/>). All downloads were performed on 27th November 2009. The version of all Bioconductor packages is 2.2.11.

Terms annotating more than 700 or less than 5 genes were discarded (Supplementary Table 12). Large gene-sets often represent broad categories without much useful biological meaning (e.g. *regulation of physiological process, zinc ion binding*). Small groups of genes, on the other hand, are not likely to produce statistically meaningful results.

### Gene-set enrichment test

The overall analytic plan is described above. We require a score to identify which genes and thus which gene sets are hit by a CNV in a particular individual. Let  $i$  index samples and  $j$  index gene sets. Define indicator  $I(i,j) = 1$  if individual  $i$  carries a CNV overlapping at least one gene in set  $j$ , and zero otherwise. Note a sample can therefore contribute to multiple gene-sets but cannot contribute more than once to the same gene-set. The total score for gene set  $j$  is obtained by summing over  $i$ . For testing, this sum is partitioned between cases and controls.

After obtaining the null distribution of  $P$ -values as described in §1, we calculate the  $q$ -value for each gene set. For subsequent analysis and illustration, we use an arbitrary threshold requiring the  $q$ -value  $\leq 12.5\%$  (Supplementary Fig. 5), recognizing that about 1 in 10 gene sets will be false positives. According to this threshold, 76 gene-sets affected by deletions (2.18% of the total tested sets) were found to be enriched in cases compared to controls and were used to construct a functional enrichment map (Fig. 3a, main paper and Supplementary Fig. 6-7).

### Cryptic bias

It is possible that some unknown bias differentiates cases and controls and confounds our gene enrichment analysis. If there were such a bias, however, we would expect to see some difference in the size or number of deletion CNVs in cases versus controls. Because we see no noteworthy or significant difference in summary statistics for these attributes (see main text, Supplementary Fig. 8, Supplementary Table 4A and 5), we believe the possibility of bias is remote. We also evaluated whether there was a relationship between enrichment significance and genome proximity. To do so, we broke the  $q$ -value scale into arbitrary bins and grouped gene sets into these bins. For every gene-set, we calculated two genomic proximity indexes: (a) the fraction of gene pairs located on the same chromosome, (b) the fraction of gene pairs having mutual distance less than 1 Mb. When the distribution of these indexes across gene-sets was plotted by bin (Supplementary Fig. 9), their median values were essentially the same across bins. In fact bins with low  $q$ -values (i.e. significant enrichment) tended to have fewer gene-sets with high proximity scores.

### Network visualization of gene-sets enriched for deletions: functional enrichment map

Enriched gene-sets are graphically organized into a network, where each set is a node and edges represent gene overlap between sets; gene sets map to specific biological processes/pathways involved in autism susceptibility. The Cytoscape network software v.2.6.3<sup>34</sup> and the plugin "Enrichment Map"<sup>35,36</sup> were used to build the network. Plugin and source code are available at <http://baderlab.org/Software/EnrichmentMap>. Node color encodes the enrichment  $q$ -value (Fig. 3a, main text and Supplementary Fig. 6-7, 10 and 12). Node size is proportional to the total number of genes belonging to the corresponding gene-set. Edge thickness is proportional to the overlap score, as defined below.

Functional gene-set clusters, identified by shaded ovals, represent groups of gene-sets with highly overlapping support genes (Supplementary Table 13). Gene-set clusters were manually identified and annotated. The size of the network justifies the sole use of the layout to identify gene-set clusters<sup>37</sup>. Satisfactory algorithmic solutions are currently not available to generate cluster summaries. Modified enrichment methods have been proposed to prioritize specific gene-sets among many redundant ones<sup>38,39</sup>; however, these tend to either favor smaller or bigger gene-sets, whereas neither option is ideal<sup>36</sup>. For these reasons we preferred to annotate clusters through an expert-based curation process.

*Gene-set overlap score*: Define “support genes” as those genes more frequently overlapped by deletions in cases than in controls and let “gene-set overlap” be proportional to the number of “support genes” that two gene-sets share between them, normalized by their size. In previous work we investigated two measures of gene overlap, Jaccard Coefficient  $JC = \frac{|A \cap B|}{|A \cup B|}$  and the

Overlap Coefficient  $OC = \frac{|A \cap B|}{\min(|A|, |B|)}$  in which  $A$  and  $B$  are two gene-sets connected by an

edge. Both have weakness when there are imbalances of counts of events in the sets. We find that the arithmetic average of these two behaves better, and that is what we use here and refer to as the weighted overlap.

### Expanded functional map between deletion-enriched gene sets and known ASD/ID genes

An expanded enrichment map was constructed to evaluate how genes affected by deletions discovered in our study functionally relate to known ASD/ID genes (ie. listed in Supplementary Table 13) (Fig. 3b, main text).

#### Visualization strategy

The map is composed of three node types:

- a) *functional* gene-sets enriched in deletions, according to the self-contained enrichment test;
- b) disease gene-sets, comprising genes known to be implicated in ASD and/or ID;
- c) *functional* gene-sets enriched in disease genes, according to the competitive enrichment test with Fisher’s exact test, but not in deletions.

Type (a) and (c) belong to the same collection of functional gene-sets, derived from Gene Ontology, pathway and protein domain annotations. Type (b) are “expert-curated” ASD/ID genes based on published findings, as described elsewhere in the paper. Type (a) nodes have round shape and are colored according to a red-to-white gradient correlated to enrichment FDR (red corresponds to FDR ~ 0%). Type (b) and (c) nodes have different shapes depending on disease (ASD: parallelogram, intellectual disability: triangle, both: octagon); type (b) are colored in green and type (c) in yellow. All node sizes are proportional to the number of member genes.

Different node types are connected by different edge types:

- 1) *type (a) gene-sets are inter-connected* using the weighted overlap coefficient between their support genes. The specific choice of support genes, rather than all member genes, reflects more accurately CNV incidence on genes (**green color**);
- 2) *type (c) are inter-connected, and also connected to type (a)* using the weighted overlap coefficient between all their member genes. Type (a) are not limited to their support genes, to take full advantage of the generalization from genes to functions operated by the enrichment test (**orange color**);
- 3) *type (b) gene-sets are connected to enriched gene-sets of type (a) and (c)*. The presence of a connection corresponds to the presence of significant enrichment (**blue color**, Fisher’s exact test  $P$ -value < 0.001).

Note the different overlap index used for a-a, a-c, c-c (above in 1-2), on one hand, and b-a, b-c (above in 3) on the other hand. The rationale for this solution is that functional sets (a, c) belong to highly inter-related resources, where overlaps tend to be large; using an index evaluating overlap significance, as done for (3), would result in excessive connectivity, and would also be systematically larger for pairs of gene-sets with more member genes. On the other hand, the overlaps from disease genes to functional sets are expected to be comparatively sparse also because there are no ontological relations pre-determining overlaps, hence the choice of the FET test to evaluate overlap significance appears more natural.



Edge thickness is proportional to the value of the overlap coefficient for type (1) and (2) or to  $-\log(P\text{-value})$  for type (3).

#### *Gene coverage analysis*

Deletion gene-set enrichment identifies functions that are significantly affected in autism. The enrichment map (Fig. 3b, main text) displays a detailed account of the relationships existing between gene-sets enriched in known disease genes and in deletions. Here we evaluate if the major functional groups enriched for deletions (Fig. 3a, main text) significantly overlap with known disease genes (Fig. 3b, main text). Since only a minority of genes within enriched sets is affected by deletions, the enrichment analysis not only provides a functional summary, but also extends the number of potential candidate genes for contribution to pathogenesis.

We evaluated how many genes from the ASD-implicated and Intellectual disability sets are also present in sets enriched for deletions. Considering the 17,660 genes in 6,129 gene-sets that passed the size filter, only a small fraction of genes is not present in the analyzed gene-sets (8.6% and 2.7% respectively), arguing for good background coverage. Both disease gene-sets have higher than expected overlap with gene-sets enriched in deletions, considering that the latter contain 30.3% (5,353/17,660) of the genes covered by all filtered gene-sets (Supplementary Fig. 11A).

In addition, we calculated the ratio between the observed and the expected number of overlapping genes between disease gene-sets and the major functional clusters of gene-sets identified as enriched in deletions: (1) all gene-sets enriched in deletions, (2) cell projection, motility and cell proliferation, (3) GTPase and Ras signaling (e.g., ref<sup>40</sup>) and 4) kinase activity/regulation. For comparison, we also included 5) a collection of less significant and less connected gene-sets (Supplementary Fig. 11B). Group (2) and (3) are particularly interesting because they have several gene-sets with top enrichment scores (i.e. small q-value) and they are highly connected to disease gene-sets, either directly, or through other gene-sets. Both disease gene-sets display enrichment in genes from deletion enriched gene-sets, with higher enrichment for groups (2) and (3), and little or no enrichment for group (5). ASD-implicated genes have higher overlap rates than Intellectual Disability genes.

**G. SUPPLEMENTARY FIGURES AND TABLES**

### Supplementary Figure 1. Quality control and analysis flow chart

Flow chart (left) shows the quality control (QC) filters performed following genotyping (SNP and intensity QC), as well as the criteria used to remove CNVs following detection. Numbers of cases (trios) and controls (right) are shown corresponding to the number remaining after each QC or removal step. The final numbers correspond to the number of cases (trios) and controls of European ancestry that were included in the rare CNV discovery. *CNV analysis*: First, we used two CNV prediction algorithms (QuantiSNP<sup>14</sup> and iPattern<sup>8</sup>) to examine the ASD family and control samples passing QC-filtering. We established a stringent dataset of non-redundant CNVs (having  $\geq 5$  consecutive probes spanning 5 kb) called by both algorithms in an individual (Fig. 1). Stringent CNVs were excluded if they were pericentromeric, had  $>70\%$  GC-content or overlapped segmental duplications over  $\geq 50\%$  of their length. We also excluded 19 samples (six cases and 13 parents) with CNVs  $>7.5$  Mb, which likely represent karyotypic abnormalities or cell-line artifacts<sup>16</sup> (Supplementary Table 2). A series of validation experiments using quantitative-PCR (qPCR) and independent microarrays on subsets of samples showed validation rates of  $>90\%$  for stringent CNV calls and  $>95\%$  for stringent CNVs  $\geq 30$  kb in size (see sections *Pilot experiment to evaluate the quality of detected stringent CNVs* and *CNV verification*).

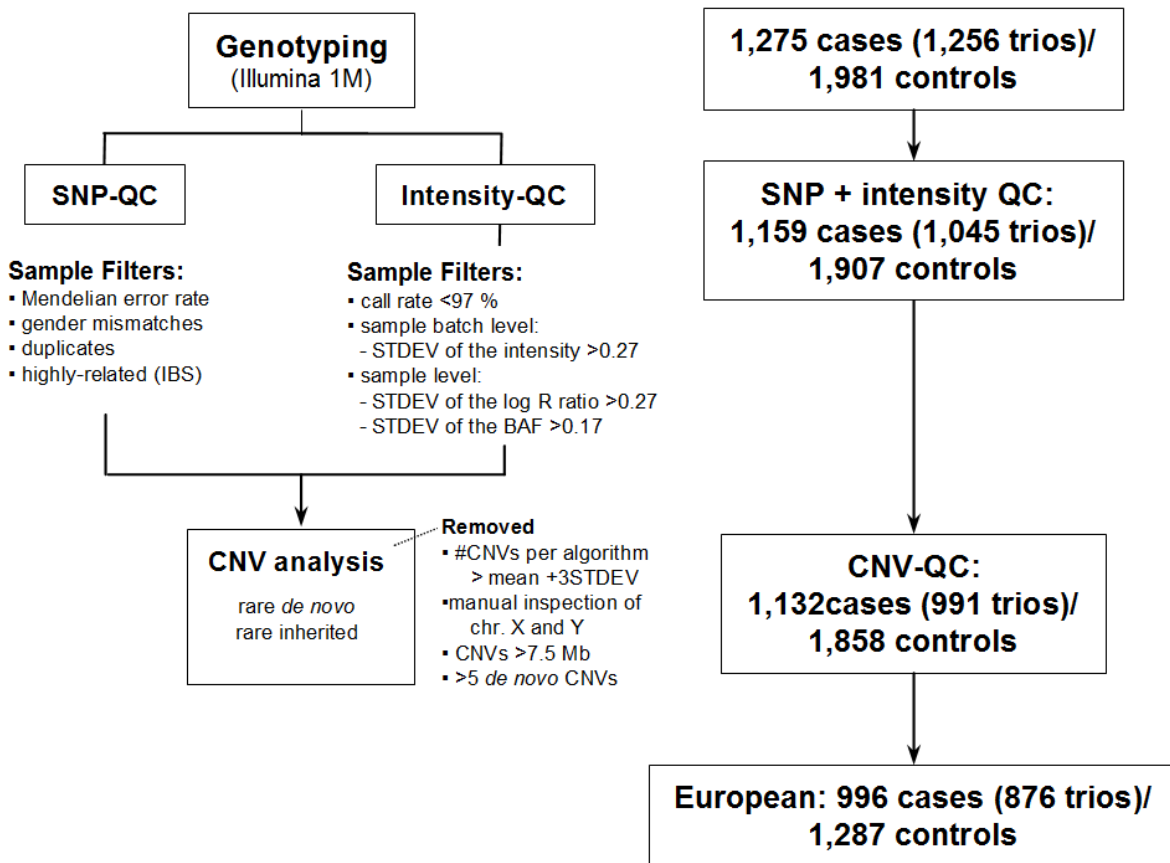

**Supplementary Figure 2. Results from ancestry analysis using genome-wide genotype data**

Presented are the first and second eigenvectors from the spectral decomposition of the genotype data. Red maps to Europeans versus non-European (blue) ancestry. Letters correspond (roughly) to Northwestern Europe (a), Southern Europe (b), other European ancestry (c), African/African-American (d), Asian (e) and Latino (f).

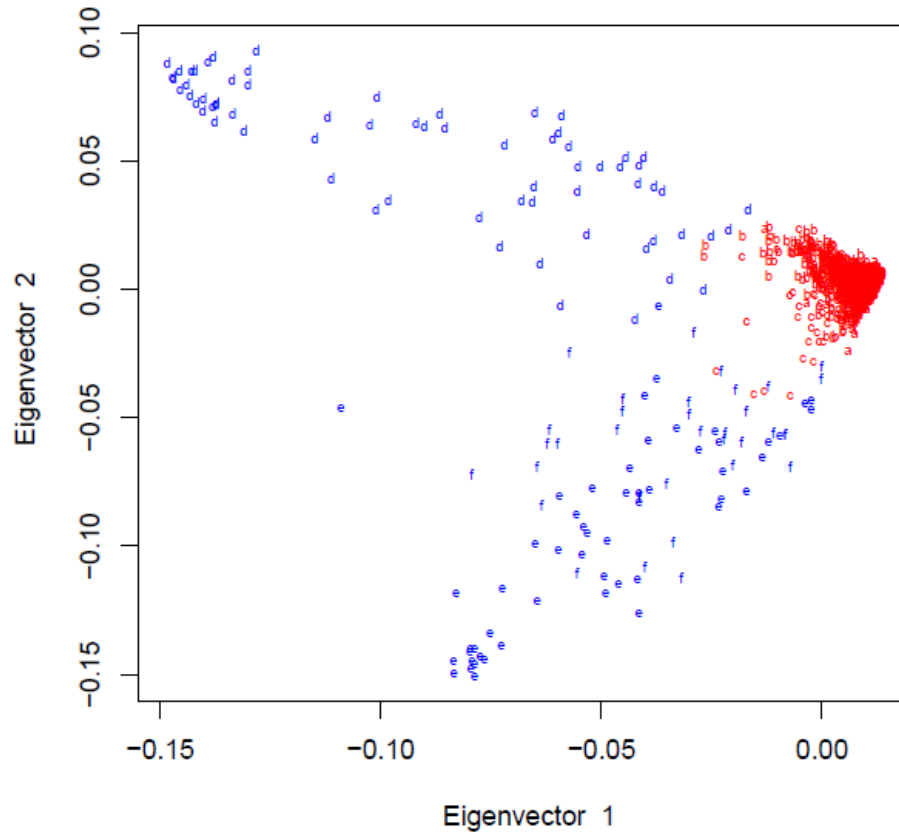

## Supplementary Figure 3. Global CNV measures for blood versus cell-line DNA-derived samples

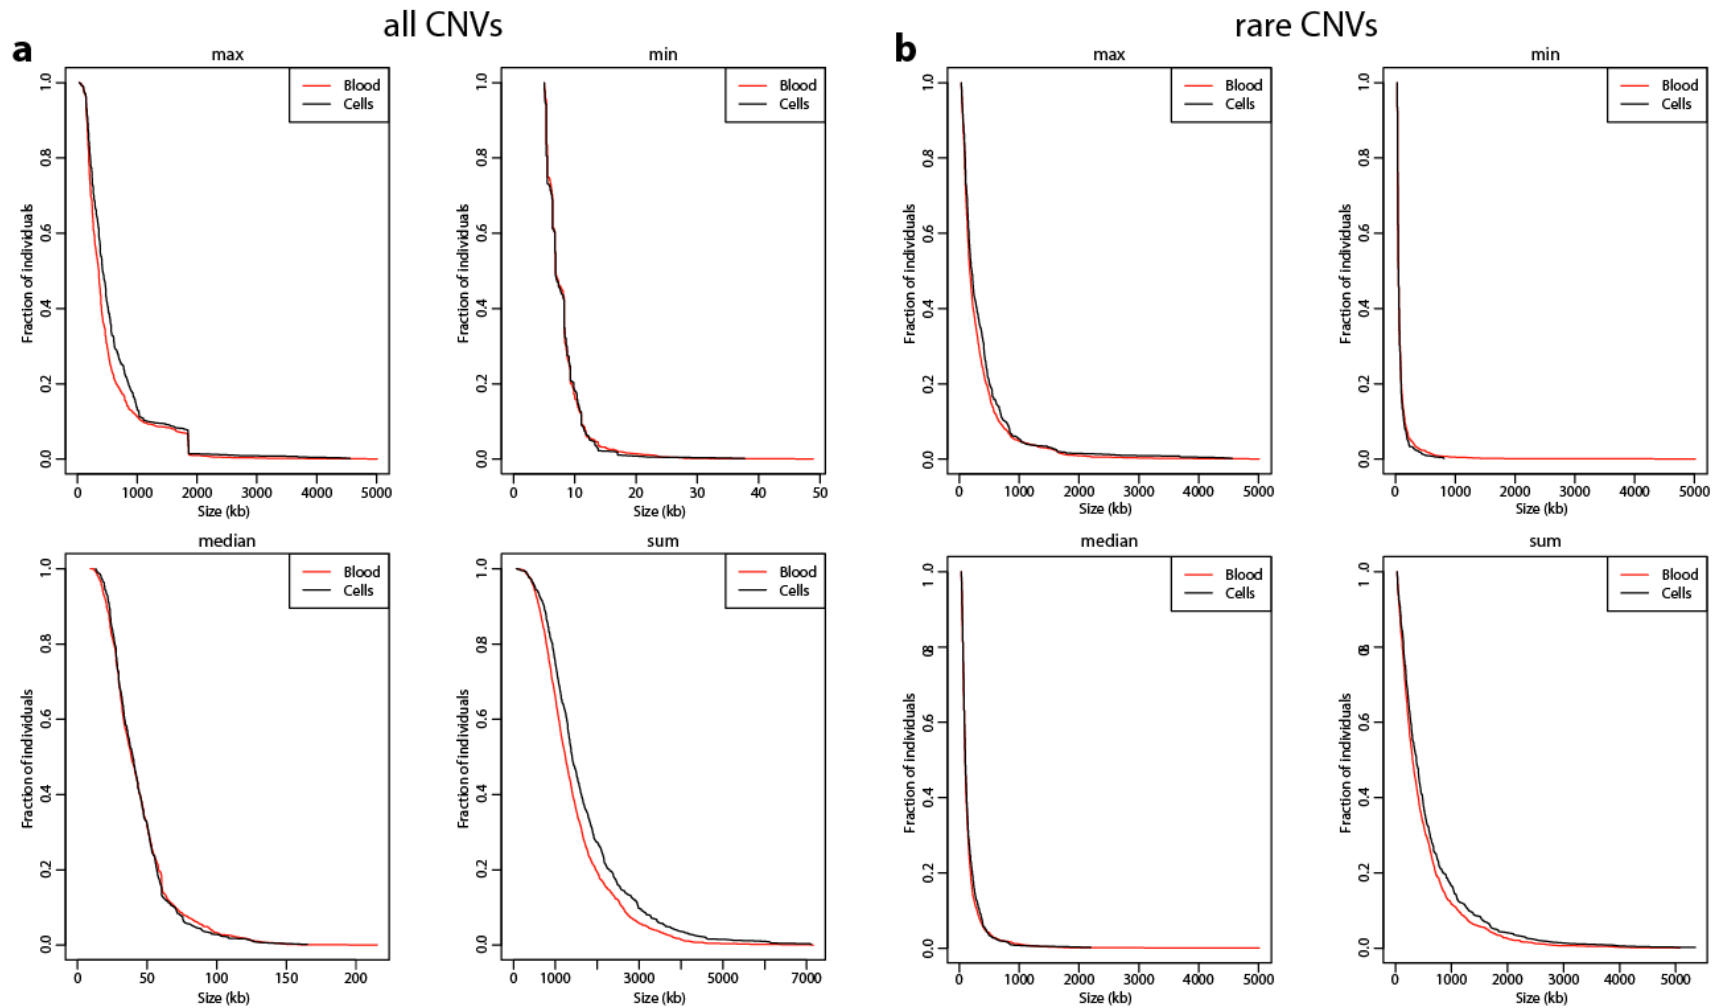

**a.** All CNVs, European-only samples; **b.** Rare CNVs, European-only samples. Cumulative distribution of the following global measures for blood (red color) and cell-lines (black color): largest (max) or smallest CNV (min.) per sample, median length and sum of all CNVs per sample. These plots indicate what proportion of samples have a median/sum/min/max CNV size greater or equal the size shown on the X-axis.

### Supplementary Figure 4. Examples of CNVs overlapping ASD candidate genes or loci

**Top level:** Genome browser image of the cytogenetic band, genomic coordinates, genes and mRNA. **Middle level:** CNVs within the IP-Q15 merged dataset (ie. identified by two algorithms) depicted as blue (deletion) or red (duplication) bars or dotted lines (when identified by only a single algorithm; either QuantiSNP: QSNP or iPattern: IP) in AGP probands and parents. Common CNVs by Conrad et al (ie. detected using a Nimblegen 42M array set)<sup>41</sup>, are also shown within the NG42M\_CNVE track. As displayed in the context of information in the Database of Genomic Variants<sup>42</sup> these regions also contain a scarcity of segmental duplications, specifically with only a maximum of one element found at, or adjacent to, the CNV boundaries. Recombination hotspots are also highlighted in the last track.

#### A. CNVs identified in the *SHANK2* region of chromosome 11q13.3

Genome browser image of the region containing *SHANK2*. Two *de novo* deletion were identified in male probands (66 kb loss in ASD case 5237\_3 and 68 kb loss in ASD case 6319\_3). No CNVs were identified in four control datasets (SAGE controls and three independent control cohorts) containing 4,964 samples.

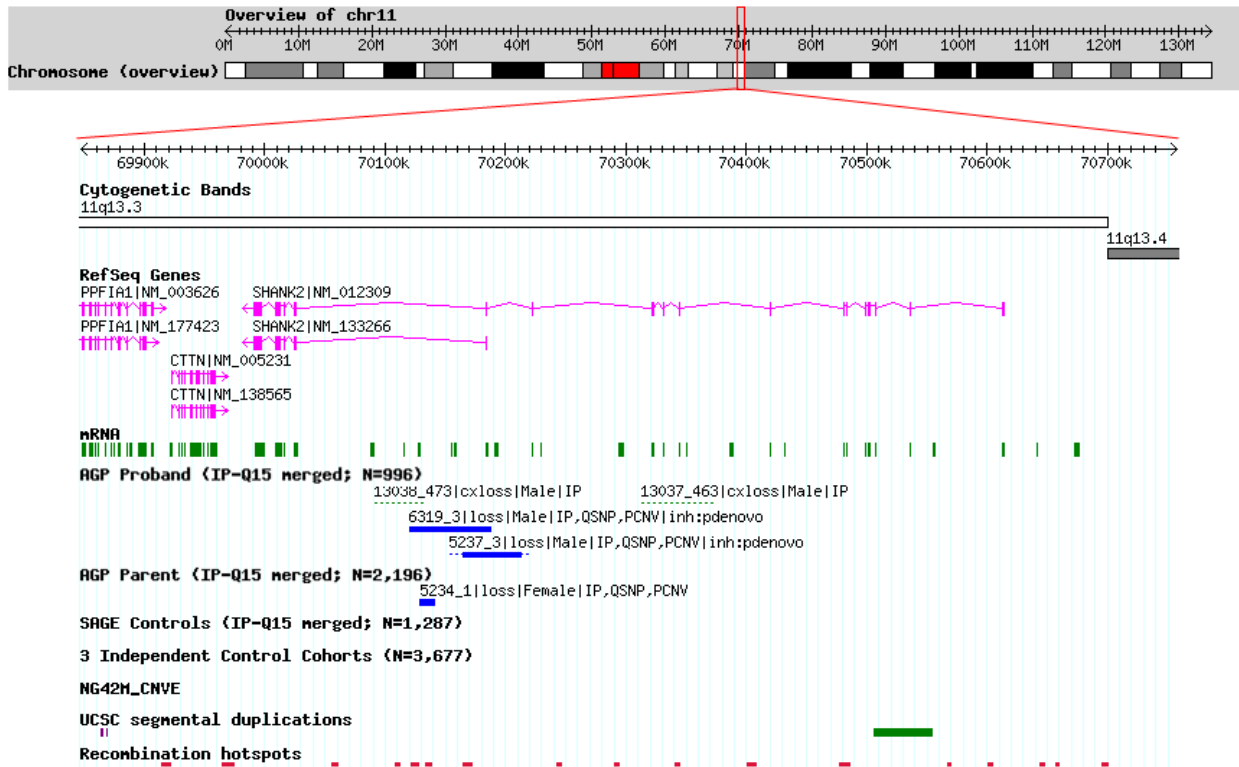

## B. CNVs identified in the *SYNGAP1* region of chromosome 6p21.32

Genome browser image of the region containing *SYNGAP1*. A single 112 kb *de novo* deletion was identified in female ASD case 5353\_3. No CNVs were identified in four control datasets (SAGE controls and three independent control cohorts) containing 4,964 samples.

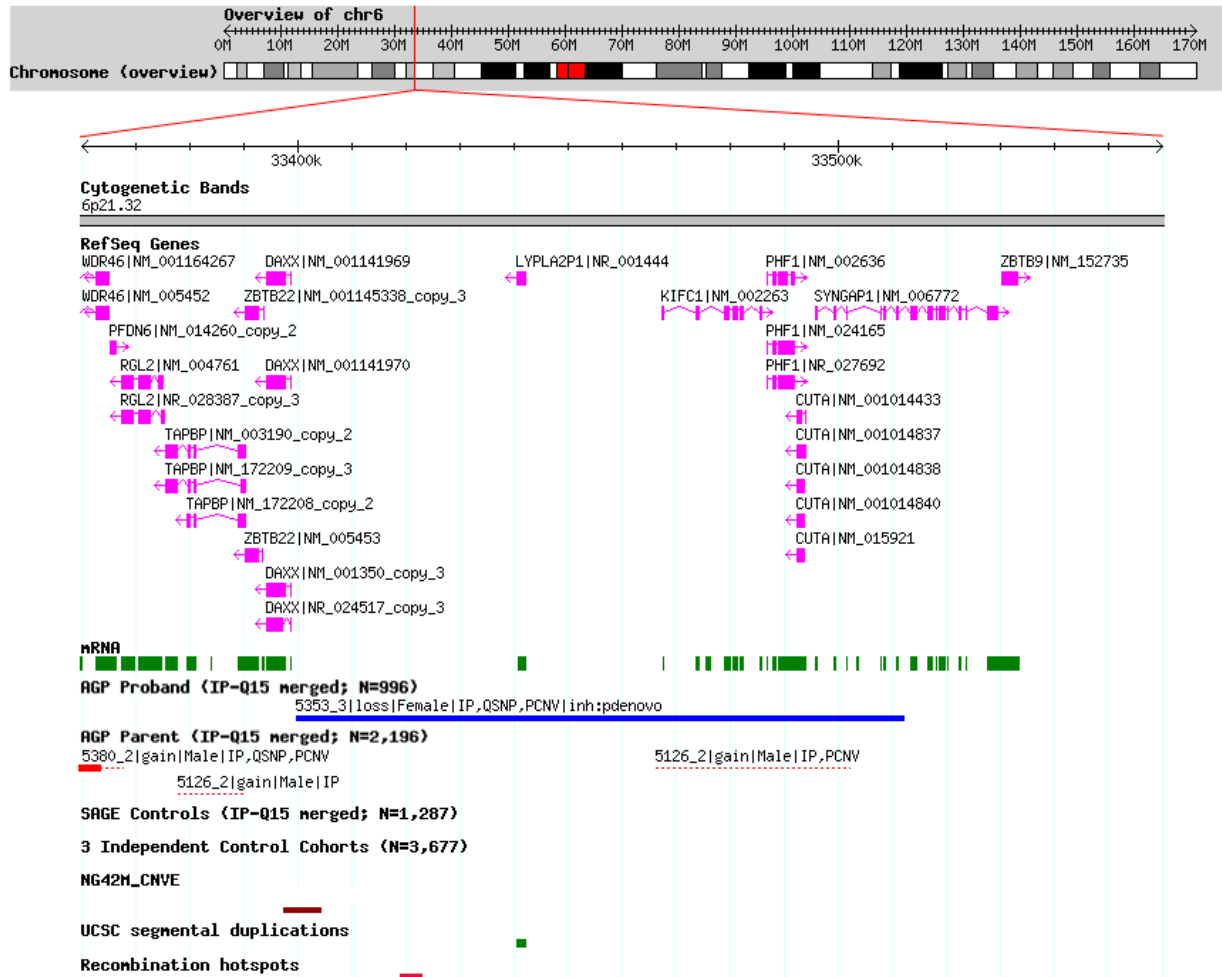

### C. CNVs identified in the *DLGAP2* region of chromosome 8p23.3

Genome browser image of the region containing *DLGAP2*. A large 817 kb *de novo* duplication was identified in a male ASD case 5290\_3 and was found to overlap the 5' end of *DLGAP2*. A single 151 kb gain overlapping *DLGAP2* was seen in a male from the Ontario Health Institute (OHI) controls<sup>6</sup> (total of 1 CNV identified in 4,964 controls from four control datasets).

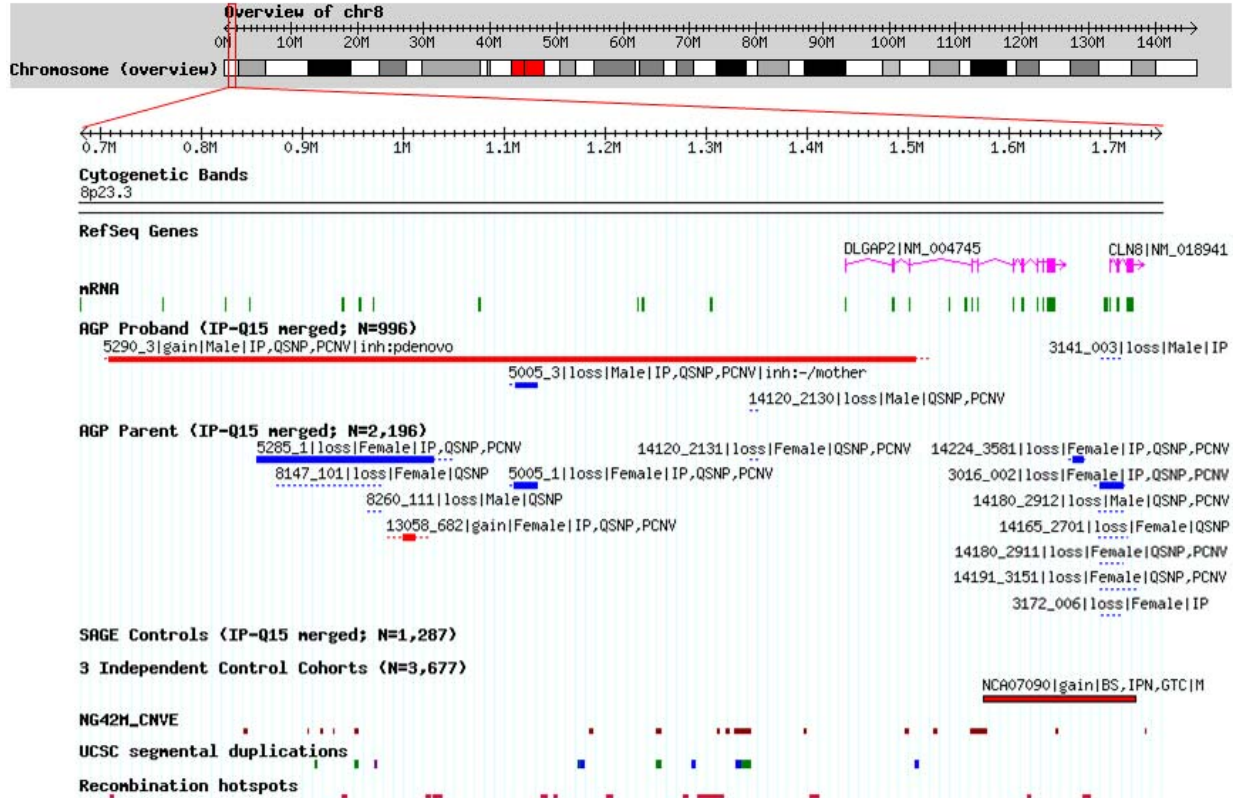



### D. CNVs identified in the *DDX53/PTCHD1* region of chromosome Xp22.11

Genome browser image of the region containing *DDX53* and *PTCHD1*. ASD case 5240\_4, which deletes exon 1 of *PTCHD1* was described previously in Marshall *et al.* 2008<sup>21</sup>. All ASD probands are males inheriting the CNV from mothers. No CNVs were identified in four control datasets (SAGE controls and three independent control cohorts) containing 4,964 samples.

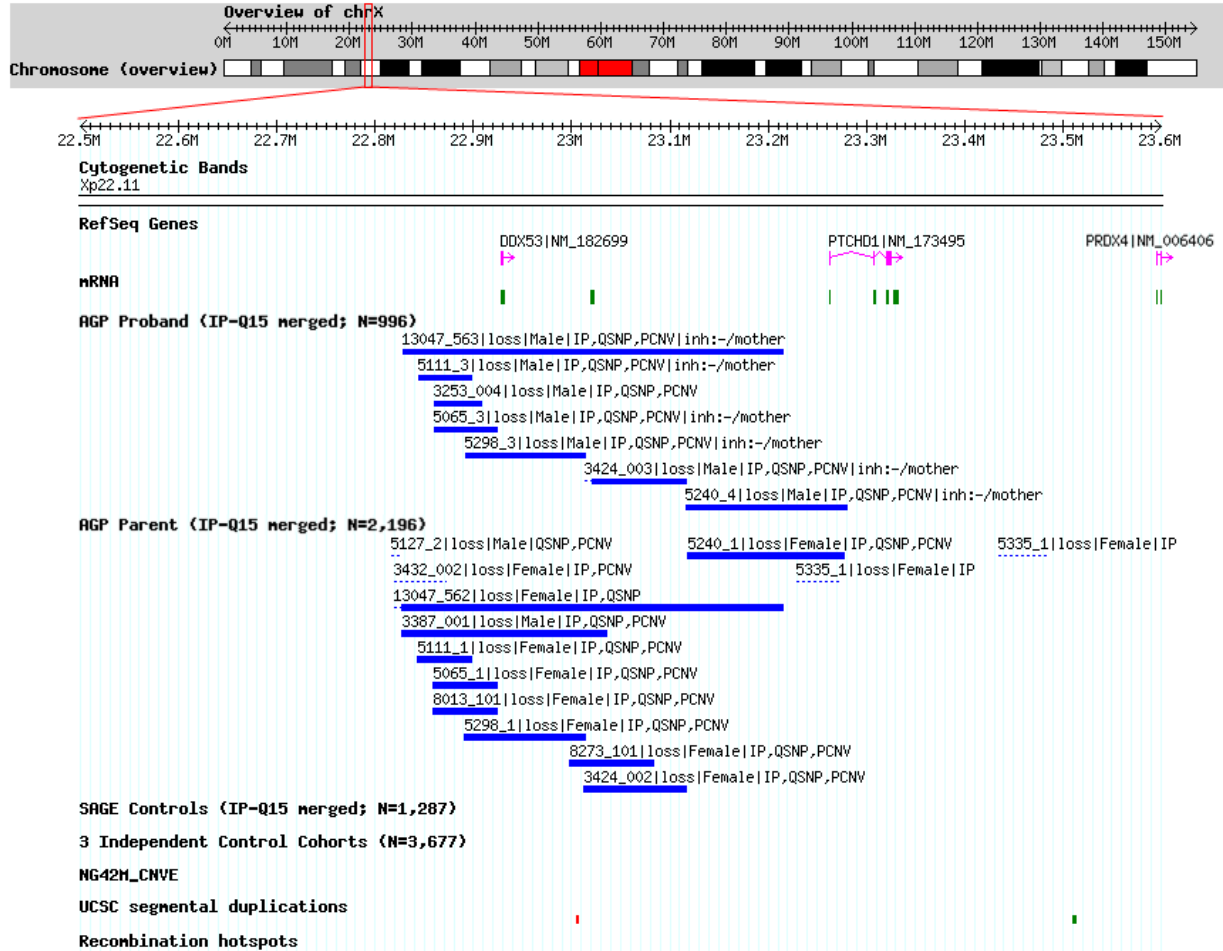

**Supplementary Figure 5. Number of enriched gene-sets at different FDR q-value thresholds**

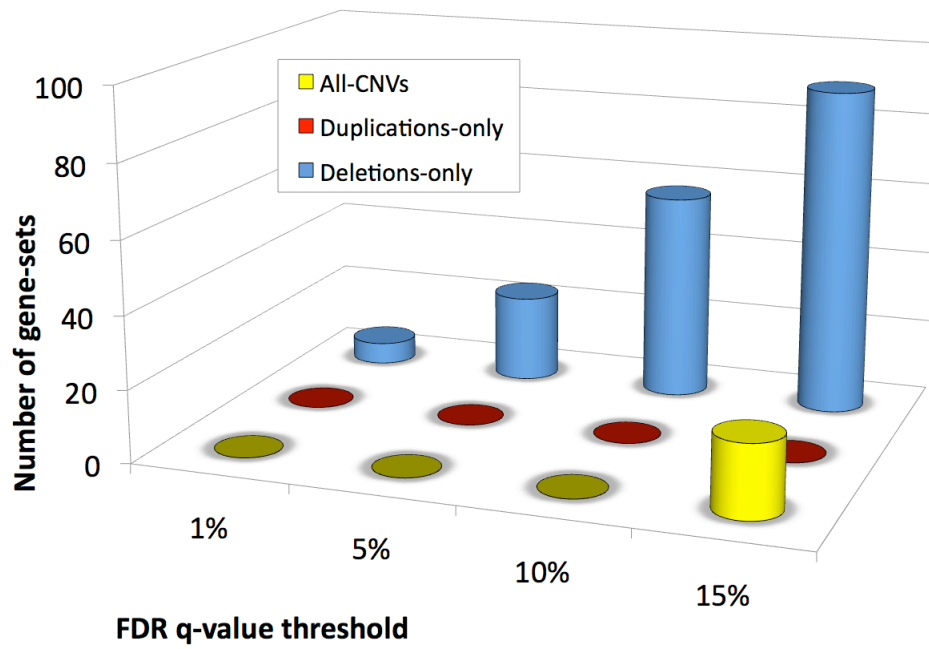

Supplementary Figure 6. Overview of all enriched gene-sets in deletions

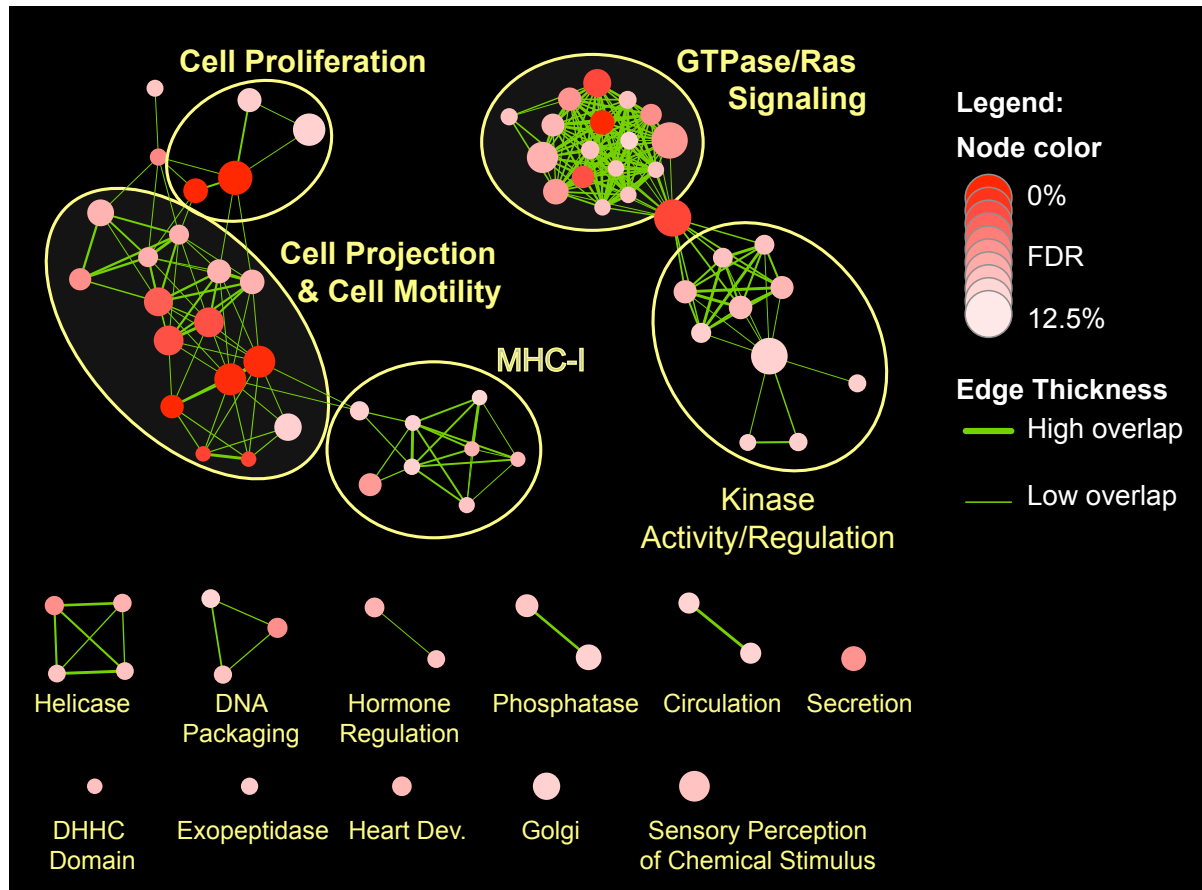

Functional enrichment map, complete view. Major gene-set clusters (57 out of 76 enriched gene-sets for deletions) are circled; they are also displayed in Fig. 3a of the main paper. The remainder 19 gene-sets form smaller clusters (i.e. composed of 2-4 gene-sets) or are not connected to any other enriched gene-set. Because they are poorly connected or 'disconnected', and their q-values are in general higher than 5% (except for protein-DNA complex assembly, helicase activity, and secretion), we chose to not display them in Fig. 3a, main text. We note though that the absence of connections to other gene-sets could be due to the paucity of gene-sets for certain biological functions, resulting in only less specific yet available gene-sets being enriched. Enrichment was also found in the MHC-I related gene-sets, however these were omitted from Fig. 3 of the main text as the enrichment was driven almost solely by the HLA-B locus. Most of such gene-sets were strictly related to MHC-I and antigen processing, with only one including a broader collection of adhesion proteins.

Supplementary Figure 7. Detailed annotation of the main enriched clusters

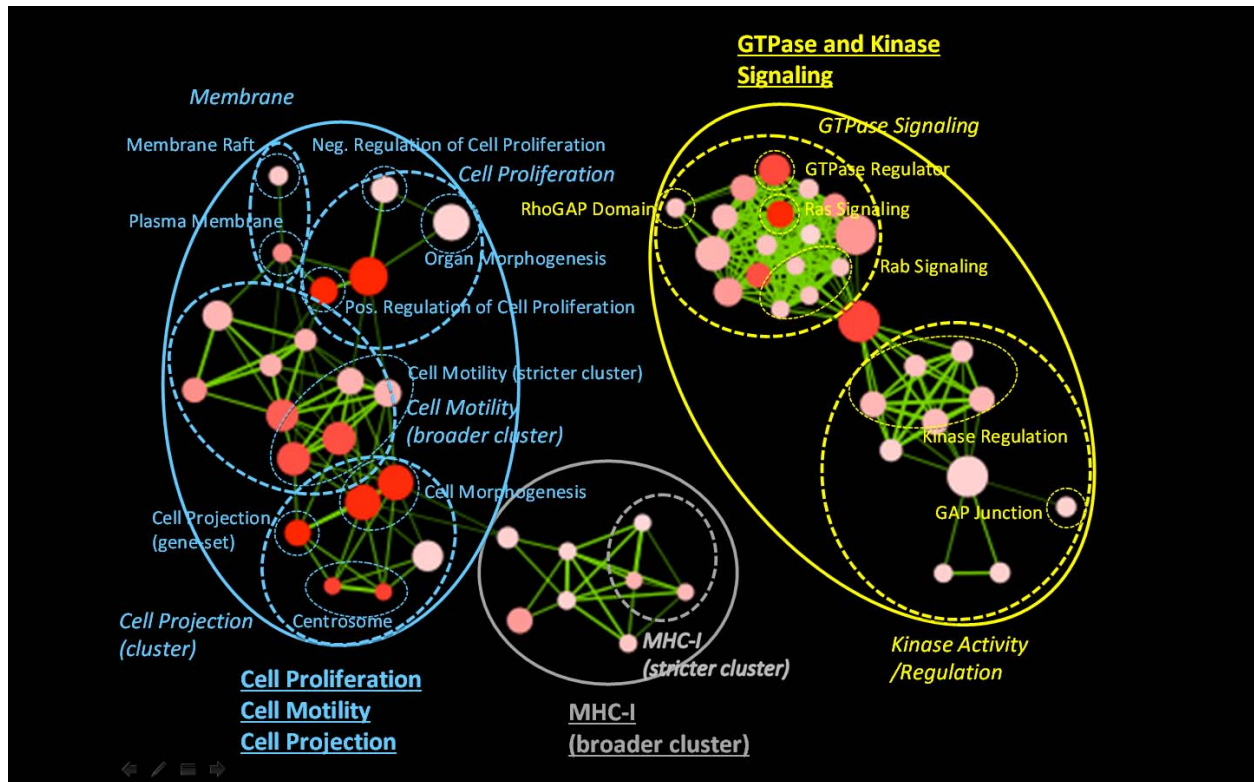

Disconnected and minor gene-set clusters are not shown. See Supplementary Fig. 6 legend for more details.

## Supplementary Figure 8. Control for bias in length and number of deletions

## A. Global measures

## Number of deletions

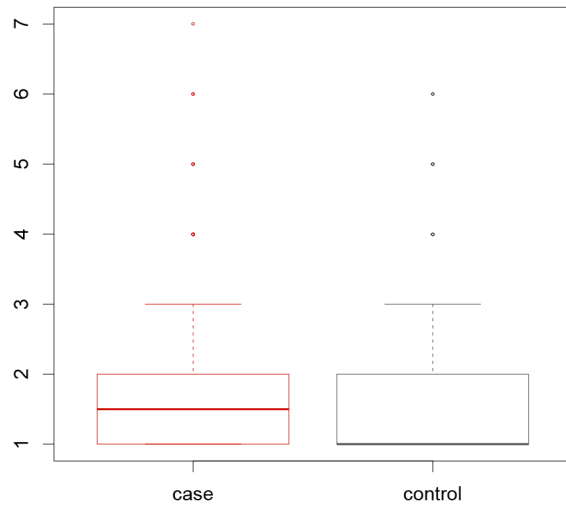

| Wilcoxon Test p-value | greater | less   |
|-----------------------|---------|--------|
| Total CNV length      | 0.7934  | 0.2067 |
| Median CNV length     | 0.9734  | 0.0266 |
| Number of CNV         | 0.2185  | 0.7816 |

## Total deletion length

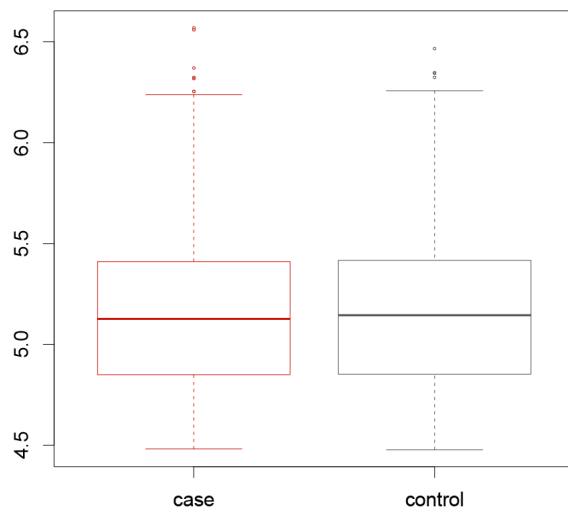

## Median deletion length

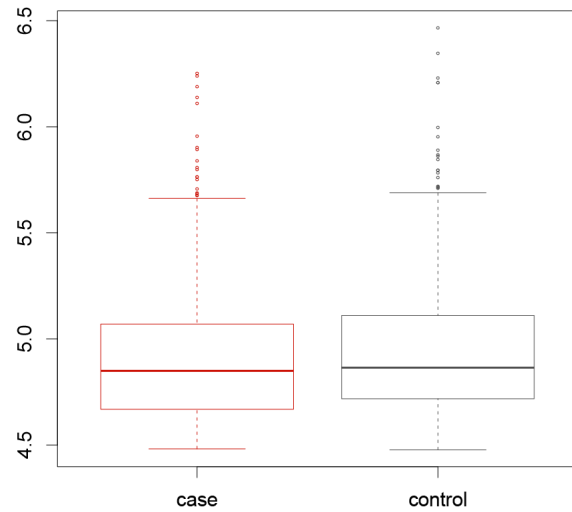

## B. Measures per gene-set

Gene-sets were grouped according to pre-fixed intervals of their q-values ( $0 < \text{q-value} \leq 0.05$ ,  $0.05 < \text{q-value} \leq 0.125$ , etc), as indicated on the x axis. The q-value on the tick marks identifies the right boundary of the interval. There were no gene-sets with q-value equal to zero. The area in grey corresponds to the sets used to draw the functional network. For every q-value interval, the total number of deletions, total deletion length and median length per gene-set were displayed as a boxplot.

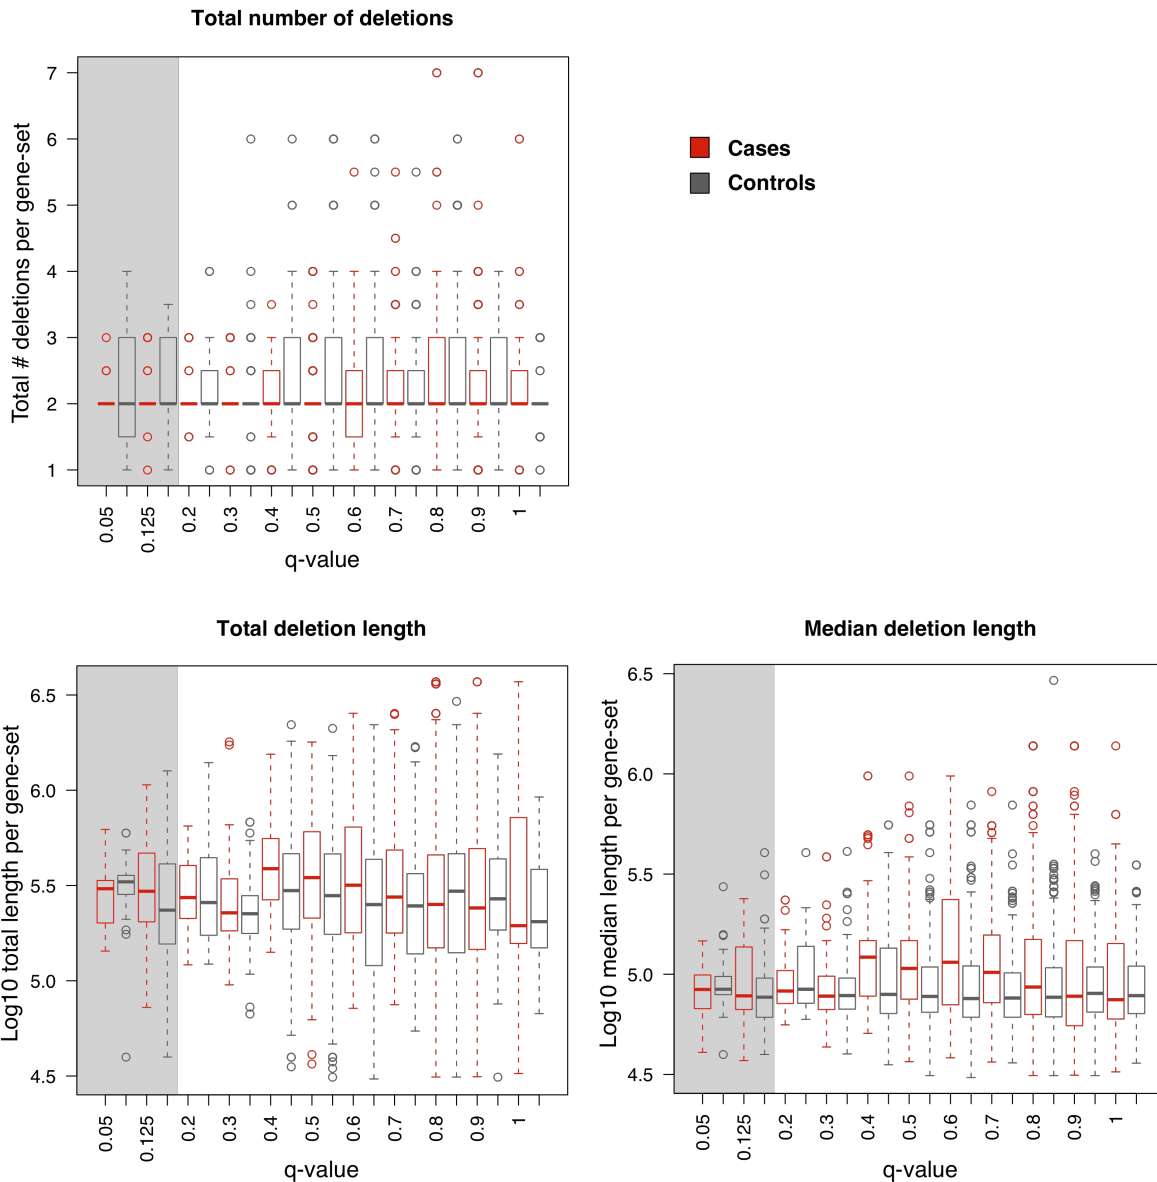

**Supplementary Figure 9. Bias control for genome proximity**

Genomic proximity scores for gene-set as a whole. Proximity criterion: **a**, Genes located on the same chromosome. **b**, Genes located on the same chromosome, within 1 Mb. Gene-sets were grouped according to pre-fixed intervals of their q-values, as described in legend of Supplementary Fig. 8B.

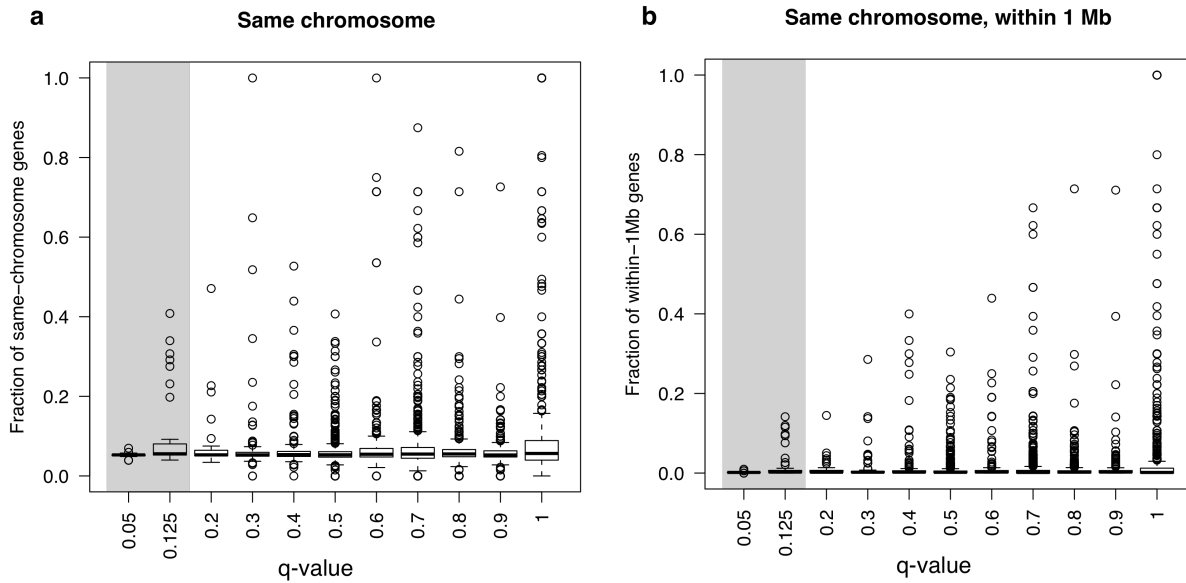

## Supplementary Figure 10. Distribution of q-values per gene-set

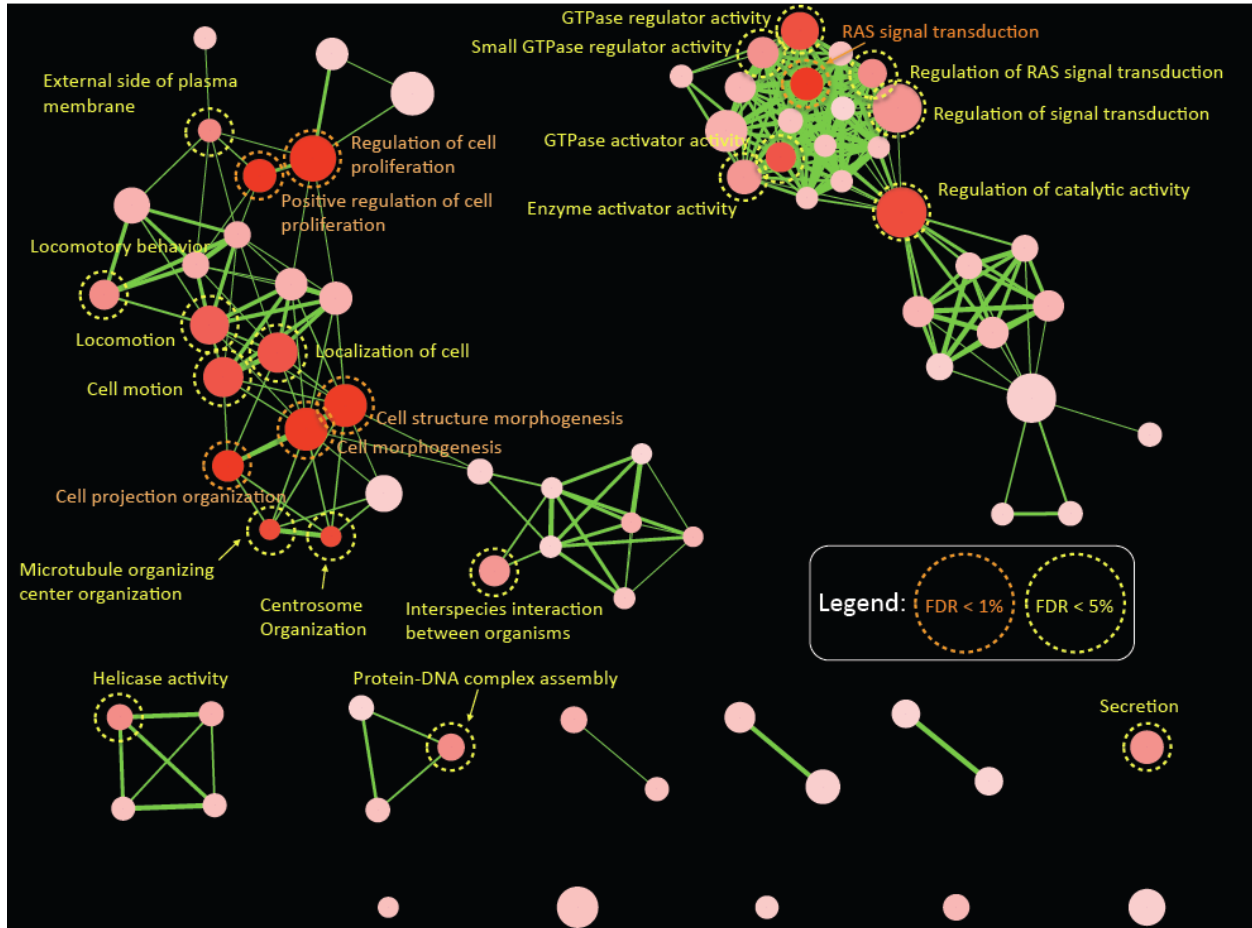

Sets colored by q-value threshold. Gene-sets passing more stringent q-value thresholds were identified in orange (<math>< 1\%</math>) and yellow (<math>< 5\%</math>) respectively. Notice that the two major clusters, Cell proliferation, motility and cell projection (1) and GTPase/RAS signaling (2) have at least one or a few gene-set passing the 1% threshold, and several passing the 5% threshold. This demonstrates the statistical reliability of larger clusters.



**Supplementary Figure 11. Gene coverage between ASD and/or ID gene-sets and sets enriched for deletions**

**A. Fraction of ASD/ID genes that are also present in gene-sets enrichment in deletions**

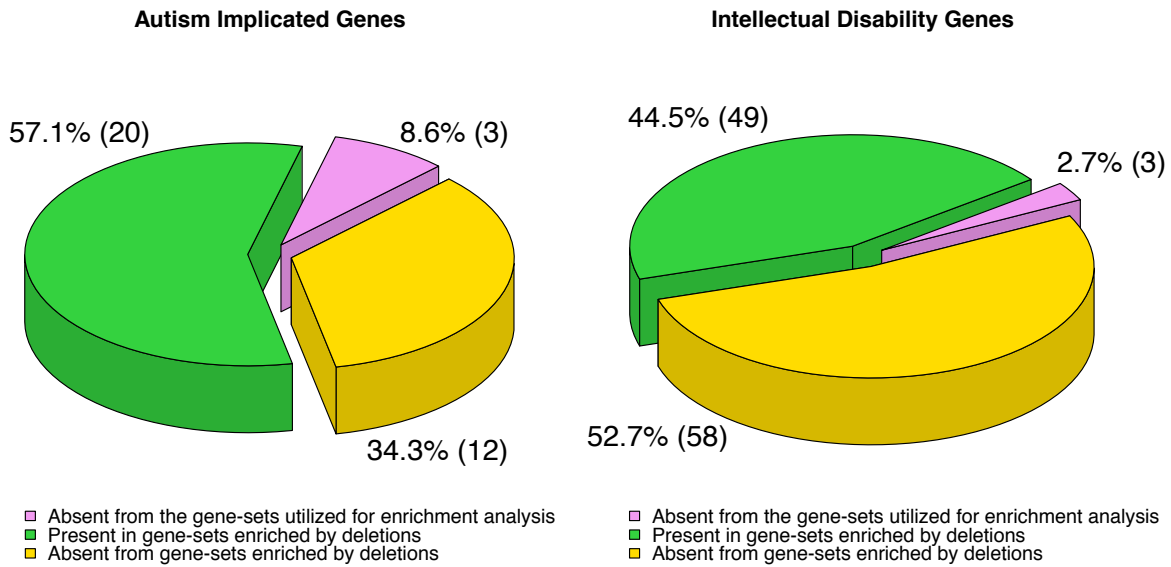

**B. Ratio of observed over expected number of overlapping genes between ASD/ID gene-sets and individual deletion-enriched gene clusters**

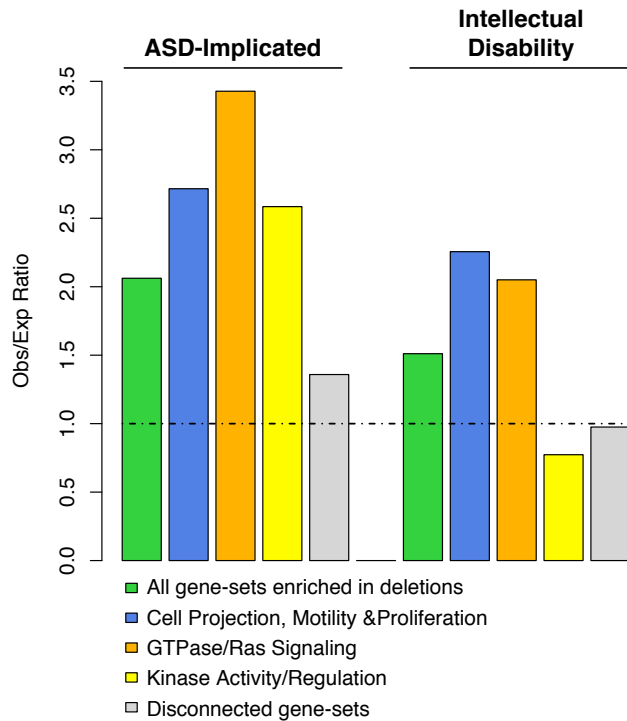

### Supplementary Figure 12: Expanded functional map with high-level of annotation detail

Most of the gene-sets were annotated, especially gene-sets highly significant or with evident connections to brain function. Zoom for the CNS Development functional group is also shown.

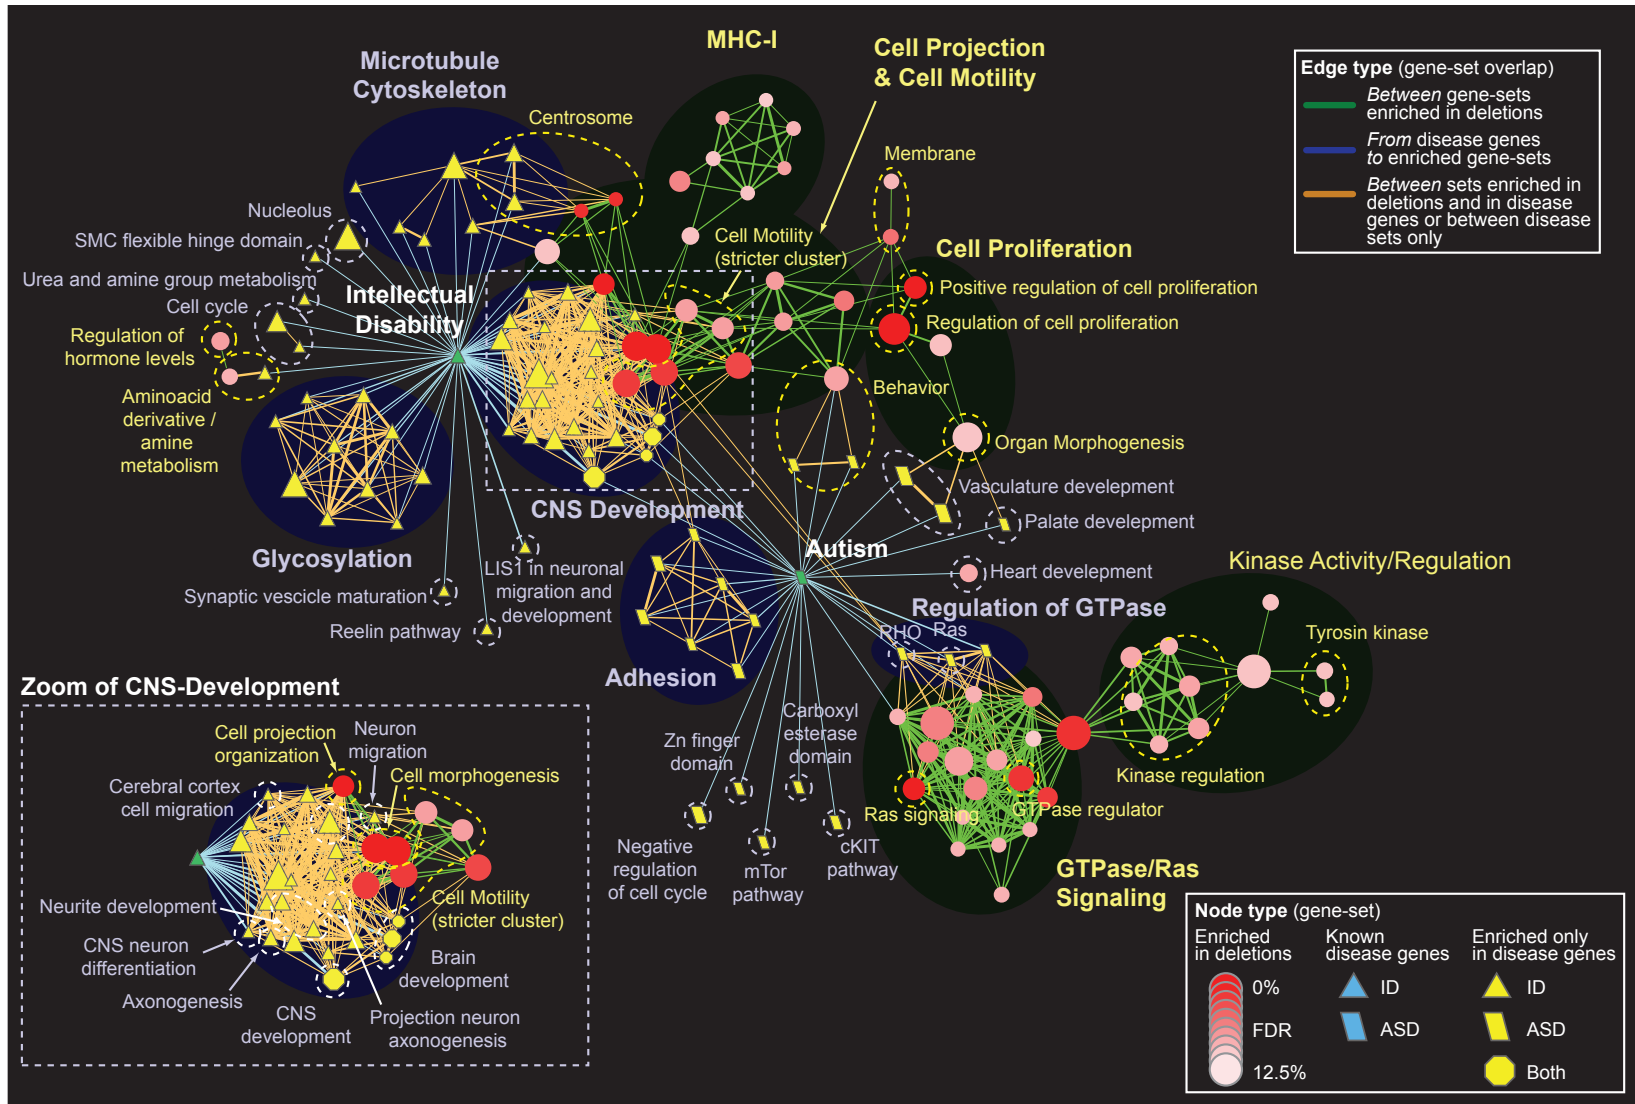

Supplementary Table 1. Quality control (QC) steps for CNV analysis of ASD cases and controls

| QC Evaluation (sample filters)                                | #AGP samples removed | #cases after QC | # trios (#duos) <sup>4</sup> | #AGP samples after QC <sup>5</sup> | #Controls removed (SAGE + HapMap) | #Controls after QC (SAGE + HapMap) | #Controls after QC (SAGE + HapMap) <sup>6</sup> |
|---------------------------------------------------------------|----------------------|-----------------|------------------------------|------------------------------------|-----------------------------------|------------------------------------|-------------------------------------------------|
| <b>Basic QC</b>                                               |                      |                 |                              |                                    |                                   |                                    |                                                 |
| # Samples                                                     | --                   | 1,275           | 1,256 (16)                   | 4,331                              | --                                | 1,880 + 101                        | 1,981                                           |
| Related samples and duplicates                                | 31                   | 1,273           | 1,254 (16)                   | 4,300                              | 18 + 23                           | 1,862 + 78                         | 1,940                                           |
| Technical controls                                            | 29                   | 1,273           | 1,254 (16)                   | 4,271                              | --                                | --                                 | 1,940                                           |
| Probands with incomplete phenotype                            | 39                   | 1,234           | 1,216 (26)                   | 4,232                              | --                                | --                                 | 1,940                                           |
| Chip call rate (<97%)                                         | 34                   | 1,226           | 1,197 (26)                   | 4,198                              | 1 + 0                             | 1,861 + 78                         | 1,939                                           |
| Mendelian error Rate (>2%)                                    | 41                   | 1,213           | 1,184 (93)                   | 4,157                              | --                                | --                                 | 1,939                                           |
| <b>Sample batch level QC</b>                                  |                      |                 |                              |                                    |                                   |                                    |                                                 |
| STDEV of the intensity <sup>1</sup> (>0.27)                   | 191                  | 1,166           | 1,065 (93)                   | 3,966                              | 31 + 0                            | 1,830 + 78                         | 1,908                                           |
| <b>Sample level QC</b>                                        |                      |                 |                              |                                    |                                   |                                    |                                                 |
| STDEV of the Log R ratio <sup>1</sup> (>0.27)                 | 19                   | 1,160           | 1,059 (102)                  | 3,947                              | 1 + 0                             | 1,829 + 78                         | 1,907                                           |
| STDEV of the BAF <sup>1</sup> (>0.17)                         | 22                   | 1,159           | 1,045 (106)                  | 3,925                              | --                                | --                                 | 1,907                                           |
| #CNV calls by iPattern (>mean + 3SD)                          | 28                   | 1,150           | 1,028 (118)                  | 3,897                              | 15 + 0                            | 1,814 + 78                         | 1,892                                           |
| #CNV calls by quantiSNP (>mean + 3SD)                         | 29                   | 1,141           | 1,007 (125)                  | 3,868                              | 9 + 0                             | 1,805 + 78                         | 1,883                                           |
| Chromosomal abnormalities (CNVs >7.5 Mb in size) <sup>2</sup> | 14                   | 1,136           | 995 (125)                    | 3,854                              | 23 + 2                            | 1,782 + 76                         | 1,858                                           |
| Excessive <i>de novo</i> CNVs (>5 <i>de novo</i> CNVs)        | 6                    | 1,134           | 993 (125)                    | 3,848                              | --                                | --                                 | --                                              |
| From same family                                              | 2                    | 1,132           | 991 (125)                    | 3,846                              | --                                | --                                 | --                                              |
| European ancestry (EA) <sup>3</sup>                           | 652                  | 996             | 876 (104)                    | 3,194                              | 521 + 50                          | 1,261 + 26                         | 1,287                                           |

<sup>1</sup>STDEV= standard deviation; BAF = B allele frequency; <sup>2</sup>In total 19 samples (six cases and 13 parents) with CNVs >7.5 Mb were excluded, ie. five of them had been excluded during previous QC steps; The two cases with duplication of the chr.Y were kept in the analyses (since CNV analyses only used autosomes and chrX; they are listed in Supplementary Table 2;

<sup>3</sup>EA: European ancestry, as estimated by spectral GEM<sup>13</sup>.

<sup>4</sup>1,275 cases (1,256 complete trios and 16 duos) were genotyped and those passing the QC filtering criteria were used in the rare CNV analysis (see also Supplementary Fig. 1). Incomplete families, where proband-father/mother duos passed QC filters were also analyzed for CNVs; <sup>5</sup>Total count includes partial families with only parents; <sup>6</sup>Two control groups genotyped with the Illumina 1M beadchip array (totaling 1,287 unrelated EA passing QC filters); i) 1,261 subjects (unrelated EA after QC) from the Study on Addiction - Genetics and Environment (SAGE) case-control GWAS study obtained through dbGAP (Study Accession: phs000092.v1.p1), and ii) 26 HapMap CEU samples (unrelated EA after QC) obtained from Illumina.

Supplementary Table 2. Chromosome abnormalities larger than 7.5 Mb detected during QC

| Sample group | Sample ID  | Status  | Gender | Tissue | Chr.           | Anomaly type                                                                                 | Karyotype                                                    | Family Type | Comments                                                                                                           |
|--------------|------------|---------|--------|--------|----------------|----------------------------------------------------------------------------------------------|--------------------------------------------------------------|-------------|--------------------------------------------------------------------------------------------------------------------|
| AGP          | 1108_2     | Father  | M      | L      | 2p             | p.arm.b.allele.freq.split                                                                    | n/a                                                          | MPX         | Mosaicism                                                                                                          |
| AGP          | 5008_1     | Mother  | F      | L      | 5q14.3-telom   | q.arm.high.inten,<br>q.arm.b.allele.freq.split                                               | n/a                                                          | MPX         | Partial duplication (5q14.3-telom); NOT found in another DNA batch by Affy500K-EA                                  |
| AGP          | 14217_3491 | Mother  | F      | B      | 9q-telom       | q.arm.b.allele.freq.split                                                                    | n/a                                                          | SPX         | Mosaicism                                                                                                          |
| AGP          | 14123_2171 | Mother  | F      | B      | 11p12-telom    | p.arm.b.allele.freq.split                                                                    | n/a                                                          | SPX         | Mosaicism (telom-p12)                                                                                              |
| AGP          | 3047_001   | Father  | M      | BBC    | 12             | high.inten,<br>b.allele.freq.split                                                           | n/a                                                          | MPX         | Whole chr12 duplication                                                                                            |
| AGP          | 1163_2     | Father  | M      | L      | 14             | high.inten,<br>b.allele.freq.split                                                           | n/a                                                          | MPX         | Whole chr14 duplication                                                                                            |
| AGP          | 1763_211   | Father  | M      | L      | 14q12-q32.33   | q.arm.high.inten,<br>q.arm.b.allele.freq.split                                               | n/a                                                          | MPX         | Partial duplication (14q12-q32.33)                                                                                 |
| AGP          | 9518_102   | Father  | M      | n/a    | 16             | high.inten,<br>b.allele.freq.split                                                           | n/a                                                          | MPX         | Whole chr16 duplication                                                                                            |
| AGP          | 5355_2     | Father  | M      | B      | 22q11.21-telom | q.arm.b.allele.freq.split                                                                    | n/a                                                          | SPX         | Mosaicism (q11.21-telom)                                                                                           |
| AGP          | 1341_1     | Mother  | F      | CL     | X              | female.low.X.inten,<br>b.allele.freq.split                                                   | XX.X0                                                        | MPX         | Mosaicism                                                                                                          |
| AGP          | 3100_002   | Mother  | F      | BBC    | X              | female.high.X.inten.<br>b.allele.freq.split                                                  | XX.XXX                                                       | MPX         | Mosaicism                                                                                                          |
| AGP          | 5134_1     | Mother  | F      | L      | X              | b.allele.freq.split                                                                          | XX.X0                                                        | MPX         | Mosaicism; NOT found in another DNA batch by Affy500K                                                              |
| AGP          | 5294_1     | Mother  | F      | B      | X              | female.low.X.inten,<br>b.allele.freq.split                                                   | XX.X0                                                        | SPX         | Mosaicism; NOT found in another DNA batch by Affy500K                                                              |
| AGP          | 5010_3     | Proband | M      | L      | 1q44, 9q-telom | 1q44.low.inten &<br>b.allele.freq.split;<br>9q.arm.high.inten,<br>9q.arm.b.allele.freq.split | n/a                                                          | MPX         | Partial duplication (9q-telom); found in the same DNA batch by Affy500K-EA                                         |
| AGP          | 14270_3930 | Proband | F      | B      | 6q25.3-q27     | high.inten,<br>b.allele.freq.split                                                           | 46,XX.ish<br>der(22)t(6;22)<br>(6q25.3;p11.2)<br>pat(6qtel+) | SPX         | ~10 Mb duplication (6q25.3-q27); confirmed by FISH, resulting from a balanced translocation in the father          |
| AGP          | 5467_3     | Proband | M      | B      | 1q42.3-q44     | high.inten,<br>b.allele.freq.split                                                           | n/a                                                          | SPX         | 13.5 Mb duplication (1q42-q44); confirmed by qPCR (probes placed in <i>PD5</i> , <i>SMYD3</i> )                    |
| AGP          | 6379_4     | Proband | M      | L      | 14             | high.inten,<br>b.allele.freq.split                                                           | 46,XY                                                        | SPX         | Mosaicism, whole chr14 duplication by one algorithm only; karyotyping excluded a chr14 trisomy; cell line artifact |
| AGP          | 5420_3     | Proband | M      | L      | 21             | male.high.X.inten,<br>b.allele.freq.split                                                    | 47,XY+21                                                     | UKN         | confirmed by karyotyping                                                                                           |

| Sample group  | Sample ID          | Status  | Gender | Tissue | Chr.            | Anomaly type                               | Karyotype              | Family Type | Comments                                                                                |
|---------------|--------------------|---------|--------|--------|-----------------|--------------------------------------------|------------------------|-------------|-----------------------------------------------------------------------------------------|
| AGP           | 13137_1543         | Proband | F      | B      | 8p12-8q12.1     | 8p-q duplication                           | 47,XX,+r[10]/46,XX[70] | UKN         | 26 Mb duplication of 8p12-8q12.1; karyotype: mosaic for a supernumerary ring chromosome |
| AGP           | 5257_3             | Proband | M      | B      | Y               | male.high.Y.inten                          | 47,XYY                 | SPX         | confirmed by karyotyping                                                                |
| AGP           | 5515_3             | Proband | M      | B      | Y               | male.high.Y.inten                          | 47,XYY                 | UKN         | confirmed by karyotyping                                                                |
| SAGE controls | B453672_1007871661 | Control | F      | L      | 7p21.2-telom    | high.inten,<br>b.allele.freq.split         | n/a                    | –           | Partial duplication (14.56 Mb; telom-p21.2)                                             |
| SAGE controls | B192507_1007872574 | Control | M      | L      | 10q21.1-q22.1   | high.inten,<br>b.allele.freq.split         | n/a                    | –           | Partial duplication (17.9 Mb; 10q21.1-q22.1)                                            |
| SAGE controls | B538284_1007874460 | Control | F      | L      | 12q24.31-q24.33 | low.inten,<br>b.allele.freq.split          | n/a                    | –           | Partial deletion (11 Mb; 12q24.31-q24.33)                                               |
| SAGE controls | B875847_1007874425 | Control | F      | L      | 12q14-telom     | b.allele.freq.split                        | n/a                    | –           | Mosaicism                                                                               |
| SAGE controls | B712092_1007853733 | Control | M      | L      | 19q13.2-telom   | b.allele.freq.split                        | n/a                    | –           | Mosaicism                                                                               |
| SAGE controls | B182886_0057061564 | Control | F      | L      | X               | b.allele.freq.split                        | XX.X0                  | –           | Mosaicism                                                                               |
| SAGE controls | B227532_1007875264 | Control | F      | L      | X               | female.low.X.inten,<br>b.allele.freq.split | XX.X0                  | –           | Mosaicism                                                                               |
| SAGE controls | B272418_1007873376 | Control | F      | L      | X               | female.low.X.inten                         | X0                     | –           | –                                                                                       |
| SAGE controls | B331706_1007843500 | Control | F      | L      | X               | female.low.X.inten                         | X0                     | –           | –                                                                                       |
| SAGE controls | B363038_1007872238 | Control | F      | L      | X               | female.low.X.inten,<br>b.allele.freq.split | XX.X0                  | –           | Mosaicism                                                                               |
| SAGE controls | B400207_1007874431 | Control | F      | L      | X               | b.allele.freq.split                        | XX.X0                  | –           | Mosaicism                                                                               |
| SAGE controls | B442361_1007872258 | Control | F      | L      | X               | b.allele.freq.split                        | XX.X0                  | –           | Mosaicism                                                                               |
| SAGE controls | B443117_1007872671 | Control | F      | L      | X               | female.low.X.inten,<br>b.allele.freq.split | XX.X0                  | –           | Mosaicism                                                                               |
| SAGE controls | B449686_1007840765 | Control | F      | L      | X               | b.allele.freq.split                        | XX.X0                  | –           | Mosaicism                                                                               |
| SAGE controls | B617470_1007872267 | Control | F      | L      | X               | b.allele.freq.split                        | XX.X0                  | –           | Mosaicism                                                                               |
| SAGE controls | B650091_1007872185 | Control | F      | L      | X               | b.allele.freq.split                        | XX.X0                  | –           | Mosaicism                                                                               |
| SAGE controls | B709845_1007875224 | Control | F      | L      | X               | b.allele.freq.split                        | XX.X0                  | –           | Mosaicism                                                                               |
| SAGE controls | B717554_1007875274 | Control | F      | L      | X               | female.low.X.inten,<br>b.allele.freq.split | XX.X0                  | –           | Mosaicism                                                                               |
| SAGE controls | B729328_1007872228 | Control | F      | L      | X               | b.allele.freq.split                        | XX.X0                  | –           | Mosaicism                                                                               |
| SAGE controls | B747337_1007873392 | Control | M      | L      | XY              | male.med.lo.Y.inten                        | XY.X0                  | –           | Mosaicism                                                                               |
| SAGE controls | B821840_1007852894 | Control | F      | L      | X               | female.low.X.inten,<br>b.allele.freq.split | XX.X0                  | –           | Mosaicism                                                                               |
| SAGE controls | B888881_1007873634 | Control | M      | B      | XY              | Multiple                                   | XY/XXY/XYY             | –           | Mosaicism                                                                               |
| SAGE controls | B915478_1007845341 | Control | M      | B      | X               | male.high.X.inten                          | XXY                    | –           | –                                                                                       |

Samples including ASD trios and controls that passed all QC filters and showed CNVs by any algorithm larger than 7.5 Mb on any of the autosomes or chrX were further inspected manually by plotting their log<sub>2</sub> ratio intensities as well as allelic genotype ratios. A molecular size cutoff of >7.5 Mb was selected to be consistent with large cytogenetically visible chromosome abnormalities. Samples containing such alterations were excluded from the analyses, except for two AGP probands with an XYY karyotype that were retained since chrY markers were not used in the CNV analysis.

Abbreviations: B: blood, BBC: buccal swab, EA: early access (Affy500K-EA vs. Affy500K), L: cell line, n/a: not available, UKN: unknown family type (extended family not evaluated for ASD).

## Supplementary Table 3: Summary of characteristics of stringent CNVs in cases and controls

## A. All-CNVs, All ancestries

|                                                             | Autism Probands      | Controls               | Parents                |
|-------------------------------------------------------------|----------------------|------------------------|------------------------|
|                                                             | All CNVs             | All CNVs               | All CNVs               |
| #Samples                                                    | 1,132                | 1,858                  | 2,712                  |
| #CNVs <sup>1</sup>                                          | 18,075               | 34,394                 | 41,946                 |
| #CNVs/genome <sup>2</sup><br>(mean / median)                | 16 / 16              | 18.5 / 18              | 15.5 / 15              |
| Mean / Median Size (kb)                                     | 111.6 / 47.5         | 92.9 / 36.6            | 106.2 / 47.5           |
| % Gain/Loss                                                 | 26.2 / 73.1          | 24.5 / 75.1            | 25.2 / 74.3            |
| #Recurrent/overlapping<br>CNVs (%) / and –Loci <sup>3</sup> | 16,650 (92.1%) / 827 | 32,741 (95.2%) / 1,239 | 39,936 (95.2%) / 1,380 |
| #CNVs >1 Mb (%)                                             | 230 (1.3%)           | 268 (0.8%)             | 461 (1.1%)             |
| #CNVs 100 kb-999 kb (%)                                     | 4,881 (27%)          | 8,017 (23.3%)          | 11,298 (26.9%)         |

<sup>1</sup> CNVs detected in the same individual by at least two algorithms were merged with the outside probes used as boundaries to identify a stringent dataset of CNVs, each CNV containing at least five consecutive probes and at least 5 kb in size.

<sup>2</sup> The number of stringent (iPattern and QuantiSNP) CNVs per genome is shown. Using iPattern and QuantiSNP alone 27 CNVs/sample and 35 CNVs/sample are detected, respectively. PennCNV called ~45 CNVs/sample, and was used to confirm inheritance status (not shown).

<sup>3</sup> The number and percentage of recurrent and/or overlapping CNVs in the dataset (%), and corresponding number of CNV loci.

## B. All-CNVs, European-only

|                                                             | Autism Probands      | Controls             | Parents                |
|-------------------------------------------------------------|----------------------|----------------------|------------------------|
|                                                             | All CNVs             | All CNVs             | All CNVs               |
| #Samples                                                    | 996                  | 1,287                | 2,196                  |
| #CNVs <sup>1</sup>                                          | 15,583               | 22,573               | 33,704                 |
| #CNVs/genome <sup>2</sup><br>(mean / median)                | 15.6 / 15            | 17.5 / 17            | 15.3 / 15              |
| Mean / Median Size (kb)                                     | 110.1 / 47.5         | 97.9 / 39.7          | 104 / 46.2             |
| % Gain/Loss                                                 | 26 / 73.4            | 24.9 / 74.7          | 25.2 / 74.3            |
| #Recurrent/overlapping<br>CNVs (%) / and –Loci <sup>3</sup> | 14,349 (92.1%) / 722 | 21,279 (94.3%) / 855 | 31,962 (94.8%) / 1,152 |
| #CNVs >1 Mb (%)                                             | 189 (1.2%)           | 201 (0.9%)           | 356 (1.1%)             |
| #CNVs 100 kb-999 kb (%)                                     | 4,205 (27%)          | 5,624 (24.9%)        | 9,045 (26.8%)          |

The table shows a summary of the characteristics of all CNVs detected in ASD cases and controls of European ancestry as estimated by Spectral GEM<sup>13</sup>. See Supplementary Table 3A for further legend details.

## Supplementary Table 4. Characteristics of rare CNVs in European ASD probands and controls

## A. Summary of rare CNVs in European probands and controls

|                                                        | ASD probands, European (n = 996 probands, 876 trios) |                        |                                                |                                   | Controls, European (n = 1,287) |                        |
|--------------------------------------------------------|------------------------------------------------------|------------------------|------------------------------------------------|-----------------------------------|--------------------------------|------------------------|
|                                                        | All CNVs                                             | Rare CNVs <sup>1</sup> | Rare putative <i>de novo</i> CNVs <sup>2</sup> | Rare inherited CNVs <sup>2‡</sup> | All CNVs                       | Rare CNVs <sup>1</sup> |
| # Samples                                              | 996                                                  | 889                    | 119                                            | 858                               | 1,287                          | 1,146                  |
| # CNVs <sup>3</sup>                                    | 15,583                                               | 2,382                  | 165                                            | 2,137                             | 22,573                         | 3,096                  |
| Mean/median # CNVs/genome <sup>4</sup>                 | 15.6/15                                              | 2.4/2                  | 0.2/0                                          | 2.1/2                             | 17.5/17                        | 2.4/2                  |
| Mean/median CNV size (kb)                              | 110.1/47.5                                           | 182.7/89.9             | 310.6/106.5                                    | 170/88.3                          | 97.9/39.7                      | 176/90.9               |
| % Gain/Loss                                            | 26/73.4                                              | 48.4/51.6              | 54.5/45.5                                      | 47.4/52.6                         | 24.9/74.7                      | 50.7/49.3              |
| # Recurrent/overlapping CNVs (%) / # Loci <sup>5</sup> | 14,349 (92.1%)<br>/722                               | 1,477 (62%)<br>/366    | 64 (39%)<br>/26                                | 1,266 (59.2%)<br>/314             | 21,279 (94.3%)<br>/855         | 2,049 (66.2%)<br>/475  |
| # CNVs >1 Mb (%)                                       | 189 (1.2%)                                           | 44 (1.8%)              | 8 (4.3%)                                       | 32 (1.5%)                         | 201 (0.9%)                     | 59 (1.9%)              |
| # CNVs >100 kb - 999 kb (%)                            | 4,205 (27%)                                          | 1,040 (43.7%)          | 78 (47.6%)                                     | 919 (43%)                         | 5,624 (24.9%)                  | 1,354 (43.7%)          |

<sup>1</sup> Rare stringent CNVs  $\geq 30$  kb present in the total sample at a frequency  $< 1\%$ . CNVs detected in the same individual by at least two algorithms were merged with the outside probes used as boundaries.

<sup>2</sup> Inheritance state was estimated for CNVs detected in 876 probands from complete trios where array data after QC was available from both parents. Using computational data only, the rate of *de novo* CNV events was initially estimated to be 6.9% (165/2,382) with 13.6% (119/876) of trio families having at least one putative *de novo* CNV. When additional computational and laboratory validation data was added (see section D. CNV Verification), we confirmed that at least 5.6% (49/876) of trio families carried at least one *de novo* CNV (average of 1.1 verified *de novo* CNVs/sample). ‡ Inheritance status could not be assigned to 80 CNVs, either because at least one of the parents did not pass QC or because the results were ambiguous. Therefore, inherited and *de novo* CNVs do not sum to 100%.

<sup>3</sup> Samples containing CNVs larger than 7.5 Mb were excluded (Supplementary Table 2).

<sup>4</sup> The number of stringent (iPattern and QuantiSNP) CNVs per genome is shown. Using iPattern and QuantiSNP alone 27 CNVs/sample and 35 CNVs/sample are detected, respectively. PennCNV called ~45 CNVs/sample.

<sup>5</sup> The number and percentage of recurrent and/or overlapping CNVs in the dataset (%), and corresponding number of CNV loci.

B. Rare *de novo* and inherited CNVs in ASD probands

|                                                            | ASD Probands, European |                                |                                         |                                         |                                                              |                                                                       |                                                                       |
|------------------------------------------------------------|------------------------|--------------------------------|-----------------------------------------|-----------------------------------------|--------------------------------------------------------------|-----------------------------------------------------------------------|-----------------------------------------------------------------------|
| <i>De novo</i> CNVs                                        | Rare (all)<br>(N=996)  | Rare <i>de novo</i><br>(N=876) | Rare <i>de novo</i><br>(MPX)<br>(N=348) | Rare <i>de novo</i><br>(SPX)<br>(N=393) | Rare <i>de novo</i> -<br>after exp.<br>validation<br>(N=876) | Rare <i>de novo</i> -<br>after exp.<br>validation<br>(MPX)<br>(N=348) | Rare <i>de novo</i> -<br>after exp.<br>validation<br>(SPX)<br>(N=393) |
| #Samples                                                   | 889                    | 119                            | 46                                      | 50                                      | 50                                                           | 19                                                                    | 22                                                                    |
| #CNVs <sup>3</sup>                                         | 2,382                  | 165                            | 69                                      | 67                                      | 55                                                           | 20                                                                    | 26                                                                    |
| Mean / median<br>#CNVs/genome                              | 2.4 / 2                | 0.2 / 0                        | 0.2 / 0                                 | 0.2 / 0                                 | 0.06 / 0                                                     | 0.06 / 0                                                              | 0.07 / 0                                                              |
| Mean / median CNV size<br>(kb)                             | 182.7 / 89.9           | 310.6 / 106.5                  | 306.6 / 117.9                           | 265.5 / 112.2                           | 524.5 / 167.9                                                | 531.3 / 129.1                                                         | 341.1 / 194.7                                                         |
| % Gain/Loss                                                | 48.4 / 51.6            | 54.5 / 45.5                    | 55 / 44.9                               | 47.8 / 52.2                             | 33.4 / 65.5                                                  | 25 / 75                                                               | 38.5 / 61.5                                                           |
| #Recurrent/overlapping<br>CNVs (%) / and Loci <sup>1</sup> | 1,477 (62%)<br>/ 366   | 64 (39%)<br>/ 26               | 16 (23.2%)<br>/ 7                       | 14 (20.9%)<br>/ 5                       | 19 (35.2%)<br>/ 9                                            | 2 (10%)<br>/ 1                                                        | 6 (23.1%)<br>/ 3                                                      |
| #CNVs >1 Mb (%)                                            | 44 (1.8%)              | 8 (4.3%)                       | 3 (4.3%)                                | 3 (4.5%)                                | 5 (9.1%)                                                     | 2 (10%)                                                               | 1 (3.8%)                                                              |
| #CNVs 100 kb-999 kb (%)                                    | 1,040 (43.7%)          | 78 (47.6%)                     | 36 (52.2%)                              | 33 (49.3%)                              | 29 (53.7%)                                                   | 10 (50%)                                                              | 16 (61.5%)                                                            |

This table shows a summary of the characteristics of *de novo* rare CNVs in multiplex (MPX) and simplex (SPX) families, before and after adding evidence from experimental laboratory validation. Inheritance state was estimated computationally for CNVs detected in 876 probands from complete trios where array data after quality control was available from both parents (i.e., up to a maximum of 876 complete trios). The *de novo* CNV rate was initially estimated to be 6.9% (165/2,382) with 13.6% of trio families (119/876) having at least one *de novo* CNV.

SPX= simplex ASD family (no first-third degree relatives with ASD); MPX= multiplex ASD family (two or more first-third degree relatives affected with ASD); U= unknown family type (extended family not evaluated);

<sup>1</sup> The number and percentage of recurrent and/or overlapping CNVs in the dataset, and corresponding number of CNV loci.



## C. Rare inherited CNVs in ASD probands

| Inherited CNVs                                           | ASD Probands, European       |                              |                              |                                   |                                       |                                       |                                   |                                       |                                       |
|----------------------------------------------------------|------------------------------|------------------------------|------------------------------|-----------------------------------|---------------------------------------|---------------------------------------|-----------------------------------|---------------------------------------|---------------------------------------|
|                                                          | Rare inherited (all) (N=876) | Rare inherited (MPX) (N=389) | Rare inherited (SPX) (N=434) | Rare inherited (maternal) (N=996) | Rare inherited (maternal-MPX) (N=389) | Rare inherited (maternal-SPX) (N=434) | Rare inherited (paternal) (N=996) | Rare inherited (paternal-MPX) (N=389) | Rare inherited (paternal-SPX) (N=434) |
| #Samples                                                 | 858                          | 340                          | 382                          | 666                               | 261                                   | 297                                   | 606                               | 240                                   | 281                                   |
| #CNVs <sup>3</sup>                                       | 2,137                        | 850                          | 977                          | 1,107                             | 436                                   | 491                                   | 983                               | 387                                   | 469                                   |
| Mean / median #CNVs/genome                               | 2.1 / 2                      | 2.2 / 2                      | 2.3 / 2                      | 1.1 / 1                           | 1.1 / 1                               | 1.1 / 1                               | 1 / 1                             | 1 / 1                                 | 1.1 / 1                               |
| Mean / median CNV size (kb)                              | 170 / 88.3                   | 182.8 / 88.3                 | 160 / 88.3                   | 163.8 / 88.6                      | 176.8 / 92.9                          | 148.9 / 85.2                          | 178.1 / 88.3                      | 190.2 / 82.4                          | 173.6 / 94.5                          |
| % Gain/Loss                                              | 47.4 / 52.6                  | 51.1 / 48.9                  | 45.8 / 54.2                  | 47.2 / 52.8                       | 48.2 / 1.8                            | 46.8 / 53.2                           | 47.7 / 52.3                       | 53.7 / 46.3                           | 45 / 55                               |
| #Recurrent/overlapping CNVs (%) / and –Loci <sup>1</sup> | 1,266 (59.2%) / 314          | 389 (45.8%) / 136            | 455 (46.6%) / 155            | 551 (49.8%) / 181                 | 149 (34.2%) / 58                      | 164 (33.4%) / 68                      | 459 (46.7%) / 142                 | 126 (32.6%) / 53                      | 155 (33%) / 62                        |
| #CNVs >1 Mb (%)                                          | 32 (1.5%)                    | 17 (2%)                      | 11 (1.1%)                    | 16 (1.4%)                         | 8 (1.8%)                              | 5 (1%)                                | 16 (1.6%)                         | 9 (2.3%)                              | 6 (1.3%)                              |
| #CNVs 100 kb-999 kb (%)                                  | 919 (43%)                    | 362 (42.6%)                  | 425 (43.5%)                  | 475 (42.9%)                       | 193 (44.3%)                           | 204 (41.5%)                           | 418 (42.5%)                       | 149 (38.5%)                           | 216 (46.1%)                           |

This table shows a summary of the characteristics of rare inherited CNVs in multiplex (MPX) and simplex (SPX) families, as well as further before and after experimental validation. See Supplementary Table 4B for further legend details. ‡ Inheritance status could not be assigned to 80 CNVs, either because at least one of the parents did not pass all QC filters or because the results were ambiguous. Therefore the columns “Rare *de novo* (N=876)” in Supplementary Table 4B and “Rare inherited (all) (N=876)” in this table do not sum up to 100%.

<sup>1</sup> The number and percentage of recurrent and/or overlapping CNVs in the dataset, and corresponding number of CNV loci.

Supplementary Table 5. Global rare CNV burden analyzes with respect to CNV size and CNV rate

| Type                             | Classification | Total CNVs (n) | CNV rate <sup>1</sup> |                 |                      | CNV sample proportion <sup>2</sup> |                 |                      | Total CNV size (kb) |                 |                      | Average CNV size (kb) |                 |                      |
|----------------------------------|----------------|----------------|-----------------------|-----------------|----------------------|------------------------------------|-----------------|----------------------|---------------------|-----------------|----------------------|-----------------------|-----------------|----------------------|
|                                  |                |                | P                     | Case/ctrl ratio | Baseline rate (ctrl) | P                                  | Case/ctrl Ratio | Baseline rate (ctrl) | P                   | Case/ctrl ratio | Baseline rate (ctrl) | P                     | Case/ctrl ratio | Baseline rate (ctrl) |
| All                              | All            | 5,478          | 0.578                 | 0.99            | 2.41                 | 0.465                              | 1.00            | 0.89                 | 0.293               | 1.03            | 475.7                | 0.276                 | 1.03            | 176.2                |
| Deletions                        | All            | 2,757          | 0.158                 | 1.04            | 1.19                 | 0.299                              | 1.02            | 0.68                 | 0.534               | 0.99            | 236.7                | 0.652                 | 0.97            | 138.2                |
| Duplications                     | All            | 2,721          | 0.884                 | 0.95            | 1.22                 | 0.892                              | 0.97            | 0.69                 | 0.124               | 1.08            | 381.4                | 0.165                 | 1.07            | 217.1                |
| <b>CNV frequency<sup>3</sup></b> |                |                |                       |                 |                      |                                    |                 |                      |                     |                 |                      |                       |                 |                      |
| All                              | 2-6x           | 1,831          | 0.437                 | 1.01            | 0.80                 | 0.805                              | 0.97            | 0.53                 | 0.030               | 1.17            | 222.9                | 0.233                 | 1.06            | 148.7                |
|                                  | 1x             | 1,419          | 0.469                 | 1.01            | 0.62                 | 0.520                              | 1.00            | 0.46                 | 0.817               | 0.93            | 183.1                | 0.874                 | 0.91            | 137.9                |
| Deletions only                   | 2-6x           | 1,094          | 0.111                 | 1.08            | 0.46                 | 0.486                              | 1.00            | 0.37                 | 0.079               | 1.20            | 171.4                | 0.188                 | 1.13            | 138.6                |
|                                  | 1x             | 880            | 0.231                 | 1.05            | 0.38                 | 0.165                              | 1.06            | 0.32                 | 0.550               | 0.99            | 125.6                | 0.613                 | 0.97            | 107.9                |
| Duplications only                | 2-6x           | 977            | 0.809                 | 0.94            | 0.44                 | 0.946                              | 0.91            | 0.34                 | 0.035               | 1.23            | 287.6                | 0.167                 | 1.12            | 232.2                |
|                                  | 1x             | 896            | 0.825                 | 0.94            | 0.40                 | 0.853                              | 0.94            | 0.33                 | 0.758               | 0.93            | 227.6                | 0.772                 | 0.93            | 183.3                |
| <b>CNV size</b>                  |                |                |                       |                 |                      |                                    |                 |                      |                     |                 |                      |                       |                 |                      |
| All                              | 30 – 500 kb    | 5,086          | 0.642                 | 0.99            | 2.24                 | 0.429                              | 1.00            | 0.87                 | 0.665               | 0.98            | 305.9                | 0.457                 | 1.00            | 116.9                |
|                                  | ≥ 500 kb       | 392            | 0.293                 | 1.06            | 0.17                 | 0.571                              | 0.99            | 0.15                 | 0.061               | 1.12            | 1,016.0              | 0.193                 | 1.07            | 941.6                |
| Deletions only                   | 30 – 500 kb    | 2,645          | 0.132                 | 1.05            | 1.14                 | 0.294                              | 1.02            | 0.67                 | 0.629               | 0.99            | 170.8                | 0.841                 | 0.96            | 101.1                |
|                                  | ≥ 500 kb       | 112            | 0.740                 | 0.90            | 0.05                 | 0.686                              | 0.93            | 0.05                 | 0.198               | 1.10            | 957.7                | 0.146                 | 1.13            | 934.5                |
| Duplications only                | 30 – 500 kb    | 2,441          | 0.944                 | 0.93            | 1.10                 | 0.863                              | 0.97            | 0.65                 | 0.416               | 1.01            | 234.8                | 0.112                 | 1.04            | 136.9                |
|                                  | ≥ 500 kb       | 280            | 0.167                 | 1.14            | 0.12                 | 0.432                              | 1.03            | 0.11                 | 0.130               | 1.11            | 992.5                | 0.333                 | 1.04            | 939.0                |

Samples and CNVs that failed stringent quality criteria had previously been excluded, maintaining CNVs with  $\geq 30$  kb in size. We tested for global CNV burden in European cases (n=996) compared to European controls (n=1,287) considering rare CNVs, i.e., CNVs that are present in less than 1% of our total sample. Analyses were further stratified according to CNV type (deletions-only and duplications-only) and frequency (CNVs observed 2-6 times and in isolated cases). Genome-wide *P*-values were estimated by permutation (one-sided, 100,000 permutations), and report on four tests for CNV burden: number of CNVs (CNV rate), CNV sample proportion (proportion of samples with one or more CNVs), total kb size spanned, and average CNV size. The baseline rate in controls and the fold increase in cases (case/control ratio) are listed for each analysis.

<sup>1</sup> #CNVs per sample

<sup>2</sup> Proportion of samples with one or more CNVs

<sup>3</sup> CNV frequency: CNVs observed 2-6 times in the total sample (2-6x) and one time (1x).

Supplementary Table 6. Examples of ASD candidate genes or loci identified by *de novo* and rare-inherited CNVs<sup>1</sup>

| Gene/locus <sup>1</sup>                 | Cyto-band     | # <i>de novo</i> CNVs in ASD, sample id (gender:parental origin:family:tissue)                                                                        | # rare inherited CNVs in ASD, sample id (gender:inheritance:family:tissue)                                                                                                                                                                                     | #rare CNVs in 1,287 controls | P (n=1,287 controls) <sup>2</sup> | Description                                                                                                                                                                                                                                                                                                                                                                                                                                                                                                                        |
|-----------------------------------------|---------------|-------------------------------------------------------------------------------------------------------------------------------------------------------|----------------------------------------------------------------------------------------------------------------------------------------------------------------------------------------------------------------------------------------------------------------|------------------------------|-----------------------------------|------------------------------------------------------------------------------------------------------------------------------------------------------------------------------------------------------------------------------------------------------------------------------------------------------------------------------------------------------------------------------------------------------------------------------------------------------------------------------------------------------------------------------------|
| <i>SHANK2</i> <sup>#</sup>              | 11q13.3-q13.4 | 66 kb del, 5237_3 (M:Mat:SPX:B)<br>68 kb del, 6319_3 (M:Pat:SPX:B)                                                                                    | 0                                                                                                                                                                                                                                                              | 0                            | (n.s.) ‡                          | Exonic deletions in <i>SHANK2</i> . Case 6319_3 also carries a rare recurrent paternally inherited 468 kb deletion at 15q11.2 between BP1-BP2 of the Prader-Willi/Angelman syndrome region. Both have PDD-NOS and mild ID.                                                                                                                                                                                                                                                                                                         |
| <i>SYNGAP1</i> <sup>#</sup>             | 6p21.32       | 112 kb del, 5353_3 (F:na:SPX:B)                                                                                                                       | 0                                                                                                                                                                                                                                                              | 0                            | (n.s.) ‡                          | Deletion of 5 genes including the <i>SYNGAP1</i> ID gene. Nonsyndromic ASD and ID.                                                                                                                                                                                                                                                                                                                                                                                                                                                 |
| <i>DLGAP2</i> <sup>#</sup>              | 8p23.3        | 817 kb dup, 5290_3 (M:Pat:SPX:B)                                                                                                                      | 0                                                                                                                                                                                                                                                              | 0                            | (n.s.)                            | Duplication intersects <i>DLGAP2</i> (interacts with <i>DLG4</i> and <i>SHANK2</i> ); also carries an 828 kb rare paternal duplication intersecting <i>PSD3</i> (found as a rare inherited deletion or duplication in two other cases). Nonsyndromic ASD.                                                                                                                                                                                                                                                                          |
| <i>CSNK1D/SLC16A3</i> <sup>#</sup>      | 17q25.3       | 2 consecutive <i>de novo</i> , 5444_3<br>829 kb dup and 64 kb del, (M:Pat:SPX:B)                                                                      | 42 kb dup, 6164_3 (F:Mat:SPX:na)                                                                                                                                                                                                                               | 0                            | (n.s.) ‡                          | Duplication in 5444_3 intersects <i>SLC16A3</i> and deletion removes exons of <i>SLC16A3</i> and <i>CSNK1D</i> . <i>CSNK1D</i> is involved in circadian rhythms. Translocation in parents has been ruled out. The maternal duplication in 6164_3 spans <i>SLC16A3</i> and intersects <i>CCDC57</i> and <i>CSNK1D</i> . Both subjects have nonsyndromic ASD.                                                                                                                                                                        |
| <i>NRXN1</i>                            | 2p16.3        | 184 kb dup, 14068_1180 (M:Mat:SPX:B)<br>191 kb del, 13017_223 (F:Pat:U:B)<br>155 kb del, 13037_463 (M:Pat:U:B)<br>232 kb del, 13153_1703 (M:Pat?:U:B) | 4 del (4M:3xPat, 1xMat)                                                                                                                                                                                                                                        | 4 del, 1 dup                 | (n.s.)**                          | <i>De novo</i> CNVs delete or duplicate exons. Rare-inherited CNVs in ASD cases and controls are intronic. ASD cases with <i>de novo</i> CNVs have nonsyndromic ASD with varying degrees of ID; the patient with the duplication and one with a deletion have normal IQ.<br><br>**There is an excess of exonic CNVs overlapping <i>NRXN1</i> in cases compared to controls. <i>P</i> -value for 4,964 controls is $7.7 \times 10^{-4}$ .                                                                                           |
| DiGeorge syndrome region - 22q11 (CNVR) | 22q11.21      | 2.58 Mb del, 3183_007 (M:Mat:MPX:BBC)                                                                                                                 | 2.54 Mb dup, 3127_004 (M:Pat:MPX:L)<br>2.54 Mb dup, 5261_4 (M:Pat:MPX:L)<br>-----<br>742 kb dup, 6125_4 (M:Pat:SPX:na)<br>744 kb dup, 3067_005 (M:Pat:MPX:L)<br>730 kb dup, 14230_3640 (M:Mat:SPX:B)                                                           | 0<br>-----<br>1 dup          | 0.030                             | A typical 22q11.2 deletion associated with DiGeorge syndrome is in 3183_007 with Asperger syndrome; his first-degree cousin, affected with autism, does not have the deletion. Reciprocal 22q11.2 microduplications were identified in 3127_004 and 5261_4. Smaller CNVs outside the DiGeorge critical region were identified in 6125_4, 3067_005, 14230_3640, and in one control sample.                                                                                                                                          |
| <i>DDX53/PTCHD1</i> <sup>#</sup> (CNVR) | Xp22.1        | 0                                                                                                                                                     | 385 kb del, 13047_563 (M:Mat:MPX:B)<br>54 kb del, 5111_3 (M:Mat:MPX:B)<br>47 kb del, 3253_004 (M:Mat:MPX:BBC)<br>63 kb del, 5065_3 (M:Mat:MPX:B)<br>121 kb del, 5298_3 (M:Mat:SPX:B)<br>103 kb del, 3424_003 (M:Mat:SPX:B)<br>164 kb del, 5240_4 (M:Mat:SPX:B) | 0                            | $3.1 \times 10^{-3}$ ‡**          | CNVR: All seven CNVs are in males and are maternally inherited. <i>DDX53</i> and <i>PTCHD1</i> are separated by ~330 kb. The first deletion encompasses <i>DDX53</i> and is less than 50 kb upstream of <i>PTCHD1</i> . The next three deletions are between 5-30 kb upstream of <i>DDX53</i> . The last three fall within 350 kb upstream of <i>PTCHD1</i> (with 5240_4 deleting exon 1)(see Supplementary Fig. 4). No CNVs seen in an additional 3,677 controls. ** <i>P</i> -value for 4,964 controls is $3.6 \times 10^{-6}$ . |
| <i>IL1RAPL1</i>                         | Xp21.2        | 0                                                                                                                                                     | 547 kb dup, 5126_4 (M:Mat:MPX:L)<br>112 kb del, 5036_4 (M:Mat:MPX:L)                                                                                                                                                                                           | 1 del                        | (n.s.)                            | Maternally-inherited CNVs in ASD males. The 547 kb intragenic duplication involves exons. The 112 kb deletion is intronic. <i>IL1RAPL1</i> is a known ID locus. Both subjects have ASD without ID. The control carrying a 412 kb deletion is a female.                                                                                                                                                                                                                                                                             |
| <i>DMD</i>                              | Xp21.1        | 0                                                                                                                                                     | 381 kb dup, 5126_4 (M:Mat:MPX:L)<br>215 kb dup, 3019_003 (M:Mat:MPX:BBC)                                                                                                                                                                                       | 1 del                        | (n.s.)                            | Maternally-inherited exonic duplications in ASD males. Case 5126_4 also carries a rare duplication of <i>IL1RAPL1</i> . The control carrying the 128 kb exonic deletion is female. The ASD brother of 3019_003 also has the duplication.                                                                                                                                                                                                                                                                                           |
| <i>AGBL4</i> <sup>#</sup>               | 1p33          | 0                                                                                                                                                     | 13 del (~85 kb)                                                                                                                                                                                                                                                | 6 del                        | 0.02                              | ATP/GTP-binding protein-like 4 gene; highly expressed in brain.                                                                                                                                                                                                                                                                                                                                                                                                                                                                    |

<sup>1</sup>Based on the analysis of 996 EA ASD cases and 1,287 SAGE controls. Additional phenotypic data is found in Supplementary Tables 7A and 7B. # = novel ASD loci detected in this study; del = deletion; dup = duplication; M = male; F = female; Pat = CNV inherited or arising *de novo* on father's chromosome; Mat = CNV inherited or arising *de novo* on mother's chromosome; SPX = simplex ASD family; MPX = multiplex ASD family; U = unknown family type; B = blood-derived DNA; L = cell-line derived DNA; BBC = buccal swab DNA; na = origin of DNA not available; ID, intellectual disability; CNVR (copy number variable region) = CNVs were merged by any overlap into one CNVR. The dashed line within a cell represents CNV regions overlapping and/or immediately adjacent to each other. CNV comparison data is found at the Autism Chromosome Rearrangement Database (<http://projects.tcag.ca/autism/>)<sup>21</sup>.

<sup>2</sup>Nominal *P*-values obtained by permutation for gene or CNVR tests. n.s. = non-significant. All *P*-values <0.1 are explicitly listed. ‡ No CNVs seen in additional 3,677 European controls.

Supplementary Table 7a. Rare *de novo* CNVs confirmed experimentally

| #  | AGP ID | Gender | ASD family type | Tissue <sup>a</sup> | Cytoband      | Start-End <sup>b</sup> | Size (bp) | CNV  | RefSeq Genes                                                                | Inheritance    | Assay location/<br>Gene      | Method                                             | Segregation in sibs                                                                                                        | Phenotype                                                                                                                                                                                                                                                                       |
|----|--------|--------|-----------------|---------------------|---------------|------------------------|-----------|------|-----------------------------------------------------------------------------|----------------|------------------------------|----------------------------------------------------|----------------------------------------------------------------------------------------------------------------------------|---------------------------------------------------------------------------------------------------------------------------------------------------------------------------------------------------------------------------------------------------------------------------------|
| 1  | 5437_3 | M      | Familial        | CL                  | 1p31.3        | 61653274-61906852      | 253 579   | Gain | <i>NFIA</i> exonic                                                          | <i>De novo</i> | <i>NFIA</i>                  | qPCR, Agilent 1M                                   | MZ twin with ASD, no CNV                                                                                                   | Autism (based on ADI-R and ADOS), average IQ, language delay, diffuse pontine glioma                                                                                                                                                                                            |
| 2  | 5437_3 | M      | Familial        | CL                  | 16p12.3       | 16538314-18268877      | 1 730 564 | Loss | <i>XYLT1</i> whole                                                          | <i>De novo</i> | <i>XYLT1</i>                 | qPCR, Agilent 1M                                   | MZ twin with ASD, no CNV                                                                                                   | (see above)                                                                                                                                                                                                                                                                     |
| 3  | 5437_3 | M      | Familial        | CL                  | 6p21.31       | 36440905-36633025      | 192 121   | Gain | <i>ETV7</i> , <i>PXT1</i> , <i>KCTD20</i> , <i>STK38</i>                    | <i>De novo</i> | <i>KCTD20</i> , <i>STK38</i> | qPCR, Agilent 1M                                   | MZ twin with ASD, no CNV                                                                                                   | (see above)                                                                                                                                                                                                                                                                     |
| 4  | 5089_5 | M      | Familial        | CL                  | 2q12.1        | 102292943-102345460    | 52 518    | Loss | <i>IL1RL1</i> whole, <i>IL18R1</i> exonic                                   | <i>De novo</i> | <i>IL1RL1</i>                | qPCR                                               | MZ twin with autism also carries CNV (1 sister with ASD, no DNA)                                                           | Autism (based on ADI-R and ADOS), severe MR (unable to complete IQ measure), below average language, no epilepsy, aplastic kidney removed, no dysmorphic features                                                                                                               |
| 5  | 5451_3 | M      | Sporadic        | Blood               | 2q31.2        | 179151463-179256105    | 104 643   | Loss | <i>TTN</i> exonic                                                           | <i>De novo</i> | <i>TTN</i>                   | qPCR                                               | (1 non-ASD brother and 1 non-ASD sister, not tested)                                                                       | Autism (based on ADI-R and ADOS), average IQ, language delay, speech/language impairment, chronic abdominal discomfort, diarrhea, no dysmorphic features                                                                                                                        |
| 6  | 5220_3 | F      | Sporadic        | Blood               | 3p24.3        | 19127998-19640299      | 512 302   | Gain | <i>KCNH8</i> whole                                                          | <i>De novo</i> | <i>KCNH8</i>                 | qPCR, Agilent 1M                                   | (1 non-ASD maternal half-sister, no DNA)                                                                                   | ASD (based on ADI-R and ADOS), average IQ, no language delay, no epilepsy; born with asymmetric head, fontanelle closed at age 4 y; dysmorphic features                                                                                                                         |
| 7  | 5245_3 | M      | Familial        | CL                  | 3q13.31       | 117285007-117477191    | 192 185   | Loss | <i>LSAMP</i> exonic                                                         | <i>De novo</i> | <i>LSAMP</i>                 | qPCR, Agilent 1M (seems mosaic)                    | 1 sister with ASD, no CNV detected by qPCR                                                                                 | Autism (based on ADI-R and ADOS), below average non-verbal IQ (<1%ile), language delay, below average language (1%ile), apraxia, abnormal sleep EEG without seizures; born at 29 wks, intraventricular hemorrhage, mild cerebral palsy; alopecia areata, no dysmorphic features |
| 8  | 5353_3 | F      | Sporadic        | Blood               | 6p21.32       | 33399849-33512042      | 112 194   | Loss | <i>CUTA</i> , <i>LYPLA2P1</i> , <i>PHF1</i> , <i>SYNGAP1</i> exonic         | <i>De novo</i> | <i>SYNGAP1</i> , <i>PHF1</i> | qPCR                                               | (2 non-ASD brothers and 1 non-ASD sister, not tested)                                                                      | Autism (based on ADI-R and ADOS), below average non-verbal IQ (<1%ile), language delay, very little spontaneous communication; EEG at age 1-2 y, possible seizure activity                                                                                                      |
| 9  | 5386_3 | M      | Familial        | Blood               | 6q25.3        | 156785155-158489874    | 1 704 720 | Loss | <i>SERAC1</i> , <i>ARID1B</i> , <i>SNX9</i> , <i>SYNJ2</i> , <i>ZDHHC14</i> | <i>De novo</i> | <i>ARID1B</i> , <i>SNX9</i>  | qPCR, Illumina 1M-duo for sib                      | 1 brother with high functioning form of ASD (with none of the abnormalities present in his brother), no CNV by Illumina 1M | Autism (based on ADI-R and ADOS), deafness (no words, 15-20 signs), epilepsy, facial dysmorphism, agenesis of the corpus callosum, loss of white matter in the occipital lobes, undescended testes                                                                              |
| 10 | 5370_3 | M      | Sporadic        | Blood               | 7q36.2        | 153775586-153844747    | 69 162    | Loss | <i>DPP6</i> exonic                                                          | <i>De novo</i> | <i>DPP6</i>                  | qPCR, Affy 500K (Marshall et al. 2008), Agilent 1M | (no sibs)                                                                                                                  | Autism (based on ADI-R and ADOS), no epilepsy, no dysmorphic features, brain CT normal                                                                                                                                                                                          |
| 11 | 5290_3 | M      | Sporadic        | Blood               | 8p23.3        | 704383-1521910         | 817 528   | Gain | <i>DLGAP2</i> exonic                                                        | <i>De novo</i> | <i>DLGAP2</i>                | qPCR, Affy 500K (Marshall AJHG 2008), Agilent 1M   | 1 brother with ASD features, no CNV by qPCR                                                                                | Autism (based on ADI-R and ADOS), unable to complete IQ measure, below average language (1%ile), no epilepsy, no dysmorphic features                                                                                                                                            |
| 12 | 5032_4 | M      | Familial        | Blood               | 9p24.3        | 98998-334508           | 235 510   | Loss | <i>DOCK8</i> exonic                                                         | <i>De novo</i> | <i>DOCK8</i>                 | qPCR                                               | 1 sister with ASD, no CNV                                                                                                  | Autism (based on ADI-R and ADOS), above average non-verbal IQ, below average language, history of seizures, no dysmorphic features                                                                                                                                              |
| 13 | 5237_3 | M      | Sporadic        | Blood               | 11q13.3-q13.4 | 70154458-70220632      | 66 175    | Loss | <i>SHANK2</i> exonic                                                        | <i>De novo</i> | <i>SHANK2</i>                | qPCR, Agilent 1M                                   | 1 non-ASD sister, no CNV                                                                                                   | Autism (based on ADI-R and ADOS), below average non-verbal IQ (1%ile), below average language (<1%ile), no epilepsy, 5th finger clinodactyly, several curled toes                                                                                                               |
| 14 | 5272_3 | M      | Familial        | Blood               | 12q23.1       | 98445422-98540678      | 95 257    | Loss | <i>ANKS1B</i> intronic                                                      | <i>De novo</i> | <i>ANKS1B</i>                | qPCR, Agilent 1M, Illumina 1M-duo for sib          | one brother with autism, no CNV                                                                                            | ASD (based on ADI-R and ADOS), average non-verbal IQ (45%ile), delayed early language development but average language abilities, no epilepsy, no dysmorphic features                                                                                                           |
| 15 | 5068_3 | F      | Familial        | Blood               | 16p11.2       | 29502984-30127026      | 624 042   | Loss | 36 genes                                                                    | <i>De novo</i> | <i>MVP</i> , <i>GDPD3</i>    | qPCR, Affy 500K (Marshall et al. 2008), Agilent 1M | 1 brother with ASD, no CNV                                                                                                 | Autism (based on ADI-R and ADOS), low average IQ, language delay, motor delay, neurologic assessment negative, adherent ear lobes; <a href="#">16p11.2 microdeletion syndrome, 50% mosaicism</a> (reported in Marshall et al. 2008; Fernandez et al. 2009; MM0088-003)          |

| #  | AGP ID | Gender | ASD family type | Tissue <sup>a</sup> | Cytoband      | Start-End <sup>b</sup> | Size (bp) | CNV  | RefSeq Genes                                                               | Inheritance    | Assay location/ Gene   | Method                                                   | Segregation in sibs                                                                                                                                          | Phenotype                                                                                                                                                                                                                                                                                                                                                                                                                                                                                                                    |
|----|--------|--------|-----------------|---------------------|---------------|------------------------|-----------|------|----------------------------------------------------------------------------|----------------|------------------------|----------------------------------------------------------|--------------------------------------------------------------------------------------------------------------------------------------------------------------|------------------------------------------------------------------------------------------------------------------------------------------------------------------------------------------------------------------------------------------------------------------------------------------------------------------------------------------------------------------------------------------------------------------------------------------------------------------------------------------------------------------------------|
| 16 | 5359_4 | M      | Sporadic        | Blood               | 16p11.2       | 29554843-30195224      | 640 381   | Loss | 39 genes                                                                   | <i>De novo</i> | <i>MVP, GDDP3</i>      | qPCR, Affy 500K (Marshall et al. 2008), Agilent 1M       | 1 non-ASD sister, no CNV                                                                                                                                     | Autism (based on ADI-R and ADOS), anxiety disorder, sleep disturbance, average IQ, delayed early language development but average language abilities, obese, macrocephaly, dysmorphic features, 2-3 toe syndactyly, micropenis, hemivertebra (T10); brain CT normal; <a href="#">16p11.2 microdeletion syndrome</a> (reported in Marshall et al. 2008; Fernandez et al. 2009; SK0019-004)                                                                                                                                    |
| 17 | 5262_4 | M      | Sporadic        | CL                  | 16p11.2       | 29502984-30210849      | 707 865   | Gain | 40 genes                                                                   | <i>De novo</i> | <i>MVP, GDDP3</i>      | qPCR, Affy 500K (Marshall et al. 2008)                   | 1 non-ASD brother and 1 non-ASD sister, no CNV in either                                                                                                     | Autism (based on ADI-R and ADOS), anxiety symptoms, below average non-verbal IQ (4%ile), below average language (<1%ile), cleft palate, congenital diaphragmatic hernia, epilepsy, recurrent ear infections, short stature, alopecia in left parietal area, hypertelorism, epicanthic folds, small ears with curved pinnae, smooth philtrum, 5th finger clinodactyly, hyperextensibility, scoliosis; <a href="#">16p11.2 microduplication syndrome</a> (reported in Marshall et al. 2008; Fernandez et al. 2009; SK0102-004) |
| 18 | 5056_4 | M      | Familial        | Blood               | 17q12         | 34612208-34732327      | 120 120   | Gain | <i>STAC2</i> whole, <i>FBXL20</i> exonic                                   | <i>De novo</i> | <i>FBXL20</i>          | qPCR                                                     | one brother with autism (5056_3), no CNV; 3 other non-ASD brothers: 5056_5, CNV (could be mosaic); 5056_6, CNV; 5056_7, no CNV (all tested with Illumina 1M) | Autism (based on ADI-R and ADOS), severe MR, below average language (<1%ile), no epilepsy, no dysmorphic features, normal neurological exam                                                                                                                                                                                                                                                                                                                                                                                  |
| 19 | 5444_3 | M      | Sporadic        | Blood               | 17q25.3       | 76953064-77782267      | 829 204   | Gain | 40 genes; distal breakpoint intersects <i>SLC16A3</i> ; tandem duplication | <i>De novo</i> | <i>BAHCC1, FASN</i>    | qPCR, Affy 500K (Marshall et al. 2008), Agilent 1M, FISH | 1 non-ASD sister, no CNV                                                                                                                                     | Autism (based on ADI-R and ADOS), MR (unable to complete IQ measure), below average language (1%ile), regression of language and motor skills at age 3 y, myoclonic epilepsy, self-injurious behavior, sleep disorder (altered circadian rhythm according to parents), no dysmorphic features                                                                                                                                                                                                                                |
| 20 | 5444_3 | M      | Sporadic        | Blood               | 17q25.3       | 77785939-77849717      | 63 779    | Loss | <i>SLC16A3</i> exonic, <i>CSNK1D</i> whole                                 | <i>De novo</i> | <i>CSNK1D, SLC16A3</i> | qPCR, Agilent 1M                                         | (see above)                                                                                                                                                  | (see above)                                                                                                                                                                                                                                                                                                                                                                                                                                                                                                                  |
| 21 | 5046_3 | M      | Familial        | CL                  | 20p12.3       | 8607242-8637441        | 30 200    | Loss | <i>PLCB1</i> exonic                                                        | <i>De novo</i> | <i>PLCB1</i>           | qPCR                                                     | 1 brother with ASD, no CNV                                                                                                                                   | Autism (based on ADI-R and ADOS), unable to complete IQ measure, below average language (1%ile), no epilepsy, no dysmorphic features                                                                                                                                                                                                                                                                                                                                                                                         |
| 22 | 5335_3 | M      | Sporadic        | CL                  | 20p12.1       | 14545734-14948785      | 403 052   | Loss | <i>MACROD2</i> exonic                                                      | <i>De novo</i> | <i>MACROD2</i>         | qPCR, Agilent 1M                                         | one healthy sib (not tested)                                                                                                                                 | Autism (based on ADI-R and ADOS), MR (IQ Leiter = 36)                                                                                                                                                                                                                                                                                                                                                                                                                                                                        |
| 23 | 6164_3 | F      | Sporadic        | U (blood or CL)     | 6q25.3        | 160023074-160081618    | 58 545    | Gain | <i>WTAP</i> exonic, <i>SOD2</i> exonic                                     | <i>De novo</i> | <i>SOD2</i>            | qPCR                                                     | (1 healthy sister, no DNA)                                                                                                                                   | Autism, mild MR, language delay, normal physical exam, normal brain MRI                                                                                                                                                                                                                                                                                                                                                                                                                                                      |
| 24 | 6321_3 | M      | Sporadic        | U (blood or CL)     | 8q12.3-8q13.1 | 65354366-66254869      | 900 504   | Loss | <i>CYP7B1</i> whole, <i>BHLHB5</i> whole                                   | <i>De novo</i> | <i>CYP7B1</i>          | qPCR                                                     | (2 healthy sisters, no DNA)                                                                                                                                  | Autism, mild MR, language delay, no dysmorphic features, flat feet, normal neurological exam                                                                                                                                                                                                                                                                                                                                                                                                                                 |
| 25 | 6246_4 | M      | Sporadic        | U (blood or CL)     | 9p23          | 9399606-9631169        | 231 564   | Loss | <i>PTPRD</i> exonic                                                        | <i>De novo</i> | <i>PTPRD</i>           | qPCR                                                     | absent in 1 healthy sister                                                                                                                                   | Autism, mild MR, no language delay, neonatal hypotonia, marfanoid habitus, arachnodactyilia                                                                                                                                                                                                                                                                                                                                                                                                                                  |
| 26 | 6319_3 | M      | Sporadic        | Blood               | 11q13.3       | 70119917-70187872      | 67 956    | Loss | <i>SHANK2</i> exonic                                                       | <i>De novo</i> | <i>SHANK2</i>          | qPCR                                                     | (1 healthy brother, no DNA)                                                                                                                                  | PDD-NOS, mild MR, language delay, functional language, no epilepsy, hypermetropia, large and prominent ears, no other dysmorphic features, flat feet, normal brain MRI                                                                                                                                                                                                                                                                                                                                                       |
| 27 | 6240_4 | M      | Sporadic        | Blood               | 11q24.2-q25   | 126633939-132060374    | 5 426 436 | Loss | 20 genes                                                                   | <i>De novo</i> | <i>OPCML, KCNJ1</i>    | qPCR                                                     | absent in 1 healthy sister                                                                                                                                   | Autism, mild MR, language delay, macrocephaly, automutilations, minor dysmorphic facial features (low ears flat nose and nasal bridge high forehead), normal neurological exam; brain MRI: white matter abnormalities; <a href="#">chromosome 11q deletion syndrome (Jacobsen syndrome)</a>                                                                                                                                                                                                                                  |
| 28 | 6053_3 | M      | Familial        | U (blood or CL)     | 12q13.3-q14.1 | 54218922-58779615      | 4 560 694 | Gain | 94 genes                                                                   | <i>De novo</i> | <i>TSMF, LRIG3</i>     | qPCR                                                     | absent in 1 sister with Asperger syndrome                                                                                                                    | Autism, moderate MR, language delay, normal physical exam                                                                                                                                                                                                                                                                                                                                                                                                                                                                    |
| 29 | 6101_4 | M      | Familial        | U (blood or CL)     | 15q24.3       | 74735339-74929817      | 194 479   | Loss | <i>SCAPER</i> exonic                                                       | <i>De novo</i> | <i>SCAPER</i>          | qPCR                                                     | absent in 1 brother with autism and 1 unaffected sister                                                                                                      | Autism, moderate MR, language delay, articulation defect, normal physical exam                                                                                                                                                                                                                                                                                                                                                                                                                                               |

| #  | AGP ID     | Gender | ASD family type | Tissue <sup>a</sup> | Cytoband | Start-End <sup>b</sup> | Size (bp) | CNV  | RefSeq Genes                                                                  | Inheritance    | Assay location/<br>Gene    | Method                                     | Segregation in sibs                         | Phenotype                                                                                                                                                                                                                                                                                                                                                                                                                                                                                            |
|----|------------|--------|-----------------|---------------------|----------|------------------------|-----------|------|-------------------------------------------------------------------------------|----------------|----------------------------|--------------------------------------------|---------------------------------------------|------------------------------------------------------------------------------------------------------------------------------------------------------------------------------------------------------------------------------------------------------------------------------------------------------------------------------------------------------------------------------------------------------------------------------------------------------------------------------------------------------|
| 30 | 6358_6     | M      | Sporadic        | U (blood or CL)     | 19p13.3  | 4548413-5287389        | 738 977   | Loss | <i>PTPRS, TNFAIP8L1, ARRD5, JMJD2B, M6PRBP1, DPP9, C19orf10, UHRF1, FEM1A</i> | <i>De novo</i> | <i>DPP9, JMJD2B, FEM1A</i> | qPCR                                       | (3 healthy sibs, no DNA)                    | Autism, low normal IQ, language delay, cleft palate, retrognathia, short philtrum, hypotelorism, strabismus, sandal gap, normal neurological exam, normal brain MRI                                                                                                                                                                                                                                                                                                                                  |
| 31 | 14068_1180 | M      | Sporadic        | Blood               | 2p16.3   | 50493827-50677835      | 184 009   | Gain | <i>NRXN1</i> exonic                                                           | <i>De novo</i> | <i>NRXN1</i>               | qPCR                                       | (not tested)                                | Autism (ADOS and ADI-R positive), normal IQ, neurodevelopmental delay with onset at 2 y (first words 9 m, first phrases 36 m, walked at 14 m), functional language; no dysmorphic features, no sleep problems, no epilepsy; brain MRI cortical atrophy                                                                                                                                                                                                                                               |
| 32 | 14070_1230 | M      | Familial        | Blood               | 15q26.1  | 91200007-91283004      | 82 998    | Loss | <i>CHD2</i> exonic                                                            | <i>De novo</i> | <i>CHD2</i>                | qPCR                                       | (1 brother with ASD not tested)             | Autism, mild MR, no language delay, no epilepsy; micrognathia, protruding ears; brain MRI: altered angular gyrus (normal variant, unknown pathological significance)                                                                                                                                                                                                                                                                                                                                 |
| 33 | 3174_003   | M      | Familial        | Blood               | 3p24.3   | 19921061-20096832      | 175 772   | Loss | <i>RAB5A, KAT2B, EFHB</i>                                                     | <i>De novo</i> | array CGH                  | Agilent 1M (SNP array indicated mosaicism) | absent in 1 brother with autism             | ADI and ADOS dx Autism, low average IQ, language delay, some gross and fine motor coordination difficulties, no dysmorphic features or associated medical or psychiatric problems, no epilepsy. This patient also carries a paternally-inherited 16p12.1 microdeletion                                                                                                                                                                                                                               |
| 34 | 3183_7     | M      | Familial        | BBC                 | 22q11.21 | 17241748-19819918      | 2 578 171 | Loss | 50 genes                                                                      | <i>De novo</i> | <i>HIRA, SNAP29</i>        | qPCR                                       | absent in 1 first degree cousin with autism | Asperger (meets criteria for autism on ADI-R and ADOS), complex language disorder with receptive and expressive difficulties; neonatal feeding difficulties, frequent diarrhea, failure to thrive, constant noisy respirations, recurrent chest and ear infections, walked at 18 m, no epilepsy, no dysmorphic features noted, head circumference P93, height P20, intermittent squint; normal brain MRI and sleep EEG; <a href="#">22q11 deletion syndrome (DiGeorge/velocardiofacial syndrome)</a> |
| 35 | 13041_503  | M      | Sporadic        | Blood               | 1q24.2   | 167493526-167507362    | 13 837    | Loss | <i>NME7</i> intronic                                                          | <i>De novo</i> | <i>NME7</i>                | qPCR                                       | (not tested)                                | Autism, non-verbal, severe MR                                                                                                                                                                                                                                                                                                                                                                                                                                                                        |
| 36 | 13153_1703 | M      | Sporadic        | Blood               | 2p16.3   | 50990306-51222043      | 231 738   | Loss | <i>NRXN1</i> exonic                                                           | <i>De novo</i> | <i>NRXN1</i>               | qPCR                                       | (not tested)                                | Autism, verbal, mild MR, Wilms tumor                                                                                                                                                                                                                                                                                                                                                                                                                                                                 |
| 37 | 13017_223  | F      | Sporadic        | Blood               | 2p16.3   | 50539877-50730546      | 190 670   | Loss | <i>NRXN1</i> exonic                                                           | <i>De novo</i> | <i>NRXN1</i>               | qPCR                                       | (not tested)                                | Autism by ADI-R and ADOS, severe learning disability (IQ < 30), non-verbal, no dysmorphic features or associated medical conditions                                                                                                                                                                                                                                                                                                                                                                  |
| 38 | 13037_463  | M      | Sporadic        | Blood               | 2p16.3   | 51002576-51157742      | 155 167   | Loss | <i>NRXN1</i> exonic                                                           | <i>De novo</i> | <i>NRXN1</i>               | qPCR                                       | (not tested)                                | Autism, mild MR, no dysmorphic features                                                                                                                                                                                                                                                                                                                                                                                                                                                              |
| 39 | 13082_963  | M      | Sporadic        | Blood               | 2p25.1   | 11712589-11741036      | 28 448    | Gain | <i>NTSR2</i> whole                                                            | <i>De novo</i> | <i>NTSR2</i>               | qPCR                                       | (not tested)                                | Autism, verbal, normal IQ                                                                                                                                                                                                                                                                                                                                                                                                                                                                            |
| 40 | 13046_553  | M      | Sporadic        | Blood               | 3q26.1   | 164004033-164101579    | 97 546    | Loss | —                                                                             | <i>De novo</i> | not in gene                | qPCR                                       | (not tested)                                | Autism, verbal, normal IQ                                                                                                                                                                                                                                                                                                                                                                                                                                                                            |
| 41 | 13046_553  | M      | Sporadic        | Blood               | 12p13.2  | 11407199-11436086      | 28 887    | Loss | <i>PRB2</i> exonic                                                            | <i>De novo</i> | not in gene                | qPCR                                       | (not tested)                                | (see above)                                                                                                                                                                                                                                                                                                                                                                                                                                                                                          |
| 42 | 13108_1253 | M      | Familial        | Blood               | 3q26.1   | 164004033-164101579    | 97 547    | Loss | —                                                                             | <i>De novo</i> | not in gene                | qPCR                                       | (not tested)                                | Autism, verbal, borderline IQ                                                                                                                                                                                                                                                                                                                                                                                                                                                                        |
| 43 | 13022_293  | M      | Sporadic        | Blood               | 4q13.1   | 63820936-63833261      | 12 325    | Loss | —                                                                             | <i>De novo</i> | not in gene                | qPCR                                       | (not tested)                                | Autism, non-verbal, MR                                                                                                                                                                                                                                                                                                                                                                                                                                                                               |
| 44 | 13007_83   | M      | Sporadic        | Blood               | 6p25.3   | 757136-794087          | 36 952    | Gain | —                                                                             | <i>De novo</i> | not in gene                | qPCR                                       | (not tested)                                | Autism, verbal, mild MR, bilateral strabismus, atypical gait                                                                                                                                                                                                                                                                                                                                                                                                                                         |
| 45 | 13094_1113 | M      | Familial        | Blood               | 6q21     | 108415352-108444960    | 29 608    | Gain | —                                                                             | <i>De novo</i> | not in gene                | qPCR                                       | (not tested)                                | Autism, non-verbal, normal IQ                                                                                                                                                                                                                                                                                                                                                                                                                                                                        |

| #  | AGP ID         | Gender | ASD family type | Tissue <sup>a</sup> | Cytoband                      | Start-End <sup>b</sup>  | Size (bp) | CNV  | RefSeq Genes                                                                                                     | Inheritance    | Assay location/ Gene | Method                                                             | Segregation in sibs | Phenotype                                                                                                                                                                                                                                                                                                                |
|----|----------------|--------|-----------------|---------------------|-------------------------------|-------------------------|-----------|------|------------------------------------------------------------------------------------------------------------------|----------------|----------------------|--------------------------------------------------------------------|---------------------|--------------------------------------------------------------------------------------------------------------------------------------------------------------------------------------------------------------------------------------------------------------------------------------------------------------------------|
| 46 | 13123_1<br>403 | F      | Sporadic        | Blood               | 9p24.3-<br>9p24.2             | 98998-<br>3682923       | 3 583 926 | Loss | <i>DMRT1, DMRT2, DMRT3, CBWD1, FLJ35024, FOXD4, KIAA0020, DOCK8, RFX3, C9orf66, KANK1, SMARCA2, KCNV2, VLDLR</i> | <i>De novo</i> | KCNV2                | qPCR                                                               | (not tested)        | Autism by ADI and ADOS, moderate/mild MR, verbal, normal birth but developed bilateral congenital diaphragmatic hernia; epilepsy, on anti-convulsants; asthma, no dysmorphic features                                                                                                                                    |
| 47 | 13094_1<br>113 | M      | Familial        | Blood               | 13q21.31                      | 63231043-<br>63277373   | 46 331    | Gain | <i>OR7E156P</i> whole                                                                                            | <i>De novo</i> | <i>OR7E156P</i>      | qPCR                                                               | (not tested)        | (see above)                                                                                                                                                                                                                                                                                                              |
| 48 | 13050_5<br>93  | M      | Sporadic        | Blood               | 15q11.2,<br>15q13.1,<br>15q12 | 21190624-<br>26203954   | 5 013 331 | Gain | 100 genes                                                                                                        | <i>De novo</i> | <i>UBE3A, GABRB3</i> | qPCR                                                               | (not tested)        | Autism by ADI and ADOS, mild MR, verbal; anoxia at birth due to cord around neck; EEG yielded inconclusive results (abnormalities in one hemisphere); asthma, no dysmorphic features. Family history of autism (nephew Asperger syndrome), depression and Down's syndrome; <a href="#">maternal 15q11-13 duplication</a> |
| 49 | 1960_30<br>1   | F      | Familial        | CL                  | 7q22.1                        | 102699832-<br>102798745 | 98 914    | Loss | <i>DNAJC2, DPY19L2P2, PMPCB, PSMC2, SLC26A5</i>                                                                  | <i>De novo</i> | SNP array            | Illumina 550K (Glessner et al. 2009)                               | (not tested)        | Autism by ADI-R and ADOS, verbal, MR, floppy infant, gastrointestinal problems (AGRE ID AU1558301)                                                                                                                                                                                                                       |
| 50 | 1142_4         | F      | Familial        | CL                  | 8q11.21                       | 48631388-<br>48802529   | 171 142   | Gain | <i>KIAA0146</i> exonic                                                                                           | <i>De novo</i> | SNP array            | Affy 5.0 (Bucan et al. 2009)                                       | (not tested)        | Autism by ADI-R and ADOS, verbal, normal IQ, seizures, gastrointestinal problems (AGRE ID AU035004)                                                                                                                                                                                                                      |
| 51 | 1050_3         | F      | Familial        | CL                  | 14q11.2                       | 20279711-<br>20345174   | 65 464    | Gain | <i>FAM12A, FAM12B, RNASE1, RNASE6</i>                                                                            | <i>De novo</i> | SNP array            | Illumina 550K (Glessner et al. 2009), Affy 5.0 (Bucan et al. 2009) | (not tested)        | Autism by ADI-R and ADOS, verbal, no MR (AGRE ID AU013303)                                                                                                                                                                                                                                                               |

<sup>a</sup> DNA source: CL, cell line (peripheral blood lymphoblastoid cell line); BBC, buccal swab; U, unknown (most were either blood or buccal swab).

<sup>b</sup> Human reference genome NCBI v36, hg18.

Abbreviations: ADI-R, Autism Diagnostic Interview-Revised; ADOS, Autism Diagnostic Observation Schedule; ASD, autism spectrum disorder; dx, diagnosis; FISH, fluorescent *in situ* hybridization; IQ, intellectual quotient; MR, mental retardation; MZ, monozygotic; PDD-NOS, pervasive developmental disorder-not otherwise specified

Supplementary Table 7b. Rare inherited CNVs confirmed experimentally

| #  | AGP ID | Gender | ASD family type | Tissue <sup>a</sup> | Cytoband | Start-End <sup>b</sup> | Size (bp) | CNV  | RefSeq Genes                                                    | Inheritance | Assay location/<br>Gene | Method                         | Segregation in sibs                                                                                | Phenotype                                                                                                                                                                                                                                                                           | Parental phenotype                     |
|----|--------|--------|-----------------|---------------------|----------|------------------------|-----------|------|-----------------------------------------------------------------|-------------|-------------------------|--------------------------------|----------------------------------------------------------------------------------------------------|-------------------------------------------------------------------------------------------------------------------------------------------------------------------------------------------------------------------------------------------------------------------------------------|----------------------------------------|
| 1  | 5072_3 | M      | Familial        | CL                  | 2p16.3   | 50912249-50955087      | 42 839    | Loss | <i>NRXN1</i> intronic                                           | Maternal    | <i>NRXN1</i>            | qPCR, Illumina 1M-duo for sib  | present in 1 brother with autism                                                                   | ASD (based on ADI-R and ADOS), average IQ, no epilepsy, no dysmorphic features                                                                                                                                                                                                      | Mother unaffected                      |
| 2  | 5110_3 | M      | Familial        | Blood               | 2q35     | 217291508-217317701    | 26 194    | Gain | —                                                               | Paternal    | not in gene             | qPCR                           | (1 brother with autism, not tested)                                                                | Autism (based on ADI-R and ADOS), average IQ                                                                                                                                                                                                                                        | Father unaffected                      |
| 3  | 5355_3 | M      | Sporadic        | Blood               | 3p26.3   | 1978504-2151165        | 172 662   | Gain | <i>CNTN4</i> exonic                                             | Maternal    | <i>CNTN4</i>            | qPCR, Illumina 1M-duo for sib  | present in 1 non-ASD sister                                                                        | Autism (based on ADI-R and ADOS), average IQ, no language delay, no epilepsy, integrative sensory dysfunction                                                                                                                                                                       | Mother unaffected, social difficulties |
| 4  | 5269_3 | M      | Sporadic        | Blood               | 3p26.3   | 2644708-2876647        | 231 940   | Gain | <i>CNTN4</i> exonic                                             | Paternal    | <i>CNTN4</i>            | qPCR, Illumina 1M-duo for sib  | present in 1 non-ASD brother                                                                       | Autism (based on ADI-R and ADOS), above average IQ, delayed language development but average language (53%ile), no epilepsy, no dysmorphic features                                                                                                                                 | Father ADHD                            |
| 5  | 5269_3 | M      | Sporadic        | Blood               | 12p13.33 | 2115897-2127756        | 11 860    | Loss | <i>CACNA1C</i> intronic                                         | Paternal    | <i>CACNA1C</i>          | qPCR, Illumina 1M-duo for sib  | 1 non-ASD brother, no CNV                                                                          | (see above)                                                                                                                                                                                                                                                                         | (see above)                            |
| 6  | 5267_3 | M      | Sporadic        | Blood               | 3p26.3   | 3098326-3184518        | 86 193    | Loss | <i>CRBN</i> , <i>IL5RA</i> , <i>TRNT1</i>                       | Paternal    | <i>CRBN</i>             | qPCR                           | (1 non-ASD sister, no DNA)                                                                         | Autism (based on ADI-R and ADOS), average IQ, no language delay, no epilepsy, no dysmorphic features                                                                                                                                                                                | Father unaffected                      |
| 7  | 5210_4 | M      | Familial        | Blood               | 3q26.31  | 174722147-174771975    | 49 829    | Gain | <i>NLGN1</i> intronic                                           | Paternal    | not in gene             | qPCR                           | (1 brother with ASD, not tested; 1 baby sister, no phenotype data, no DNA)                         | Autism (based on ADI-R and ADOS), average nonverbal IQ, language delay; born at 35 wks by emergency C-section, respiratory distress; cerebral palsy, right hemiplegia, anomalies on MRI compatible with motor deficits; at age 2 y: head circumference P20, weight P90; no epilepsy | Father unaffected                      |
| 8  | 5003_3 | F      | Familial        | CL                  | 3p21.31  | 50,098,421-50,197,697  | 99 277    | Gain | <i>RBMS</i> whole, <i>SEMA3F</i> exonic                         | Paternal    | <i>SEMA3F</i>           | qPCR, Affy500K (proband)       | 2 brothers with autism: 1 with CNV (5003_5), 1 without (5003_4)                                    | ASD (based on ADI-R and ADOS), average IQ, average language, no epilepsy, curved 5th finger, toe syndactyly                                                                                                                                                                         | Father unaffected                      |
| 9  | 5070_4 | M      | Familial        | Blood               | 4p15.31  | 20944461-20960842      | 16 382    | Loss | <i>KCNIP4</i> intronic                                          | Paternal    | <i>KCNIP4</i>           | qPCR                           | (1 brother with ASD, not tested)                                                                   | Autism (based on ADI-R and ADOS), average nonverbal IQ (34%ile), below average language (<1%ile), no epilepsy, no dysmorphic features                                                                                                                                               | Father unaffected                      |
| 10 | 5332_3 | M      | Sporadic        | CL                  | 5p12     | 43037358-43096689      | 59 332    | Loss | <i>C5orf39</i> whole, <i>LOC153684</i> whole                    | Maternal    | <i>C5orf39</i>          | qPCR, Illumina 1M-duo for sibs | 1 non-ASD twin brother (5332_5, zygosity unknown) and 1 non-ASD brother (5332_4), no CNV in either | Autism (based on ADI-R and ADOS), ADHD, below average nonverbal IQ (<1%ile), language delay, no epilepsy; strabismus, mildly slanted eyes, epicanthic folds, sandal gap                                                                                                             | Mother unaffected                      |
| 11 | 5521_3 | M      | Sporadic        | Blood               | 6p22.1   | 26240643-26359580      | 118 938   | Gain | 17 genes                                                        | Maternal    | <i>HIST1H2AE</i>        | qPCR                           | 2 non-ASD sisters, no CNV in either                                                                | Autism (based on ADI-R and ADOS), below average IQ (<1%ile), nonverbal, seizure disorder, coarse facial features                                                                                                                                                                    | Mother unaffected                      |
| 12 | 5521_3 | M      | Sporadic        | Blood               | Xp22.12  | 19471138-19861338      | 390 201   | Gain | <i>CXorf23</i> exonic, <i>SH3KBP1</i> exonic                    | Maternal    | <i>SH3KBP1</i>          | qPCR                           | 2 non-ASD sisters, no CNV in either                                                                | (see above)                                                                                                                                                                                                                                                                         | (see above)                            |
| 13 | 5122_3 | M      | Familial        | CL                  | 7p21.1   | 17868378-18192733      | 324 356   | Gain | <i>PRPS1L1</i> whole, <i>SNX13</i> exonic                       | Maternal    | not in gene             | qPCR, Illumina 1M-duo for sib  | 1 brother with autism, no CNV (1 non-ASD sister, not tested)                                       | Autism (based on ADI-R and ADOS), severe MR, below average language (<1%ile), seizures, small built, wasted thin extremities, protruding abdomen                                                                                                                                    | Mother unaffected                      |
| 14 | 5200_3 | M      | Sporadic        | Blood               | 7q21.13  | 89626742-89825983      | 199 242   | Gain | <i>C7orf63</i> , <i>GTPBP10</i> , <i>STEAP1</i> , <i>STEAP2</i> | Paternal    | <i>C7orf63</i>          | qPCR, Illumina 1M-duo for sib  | 1 non-ASD sister, no CNV                                                                           | Autism (based on ADI-R and ADOS), below average IQ (5%ile), below average language (3%ile), no epilepsy, no dysmorphic features                                                                                                                                                     | Father unaffected                      |
| 15 | 5014_4 | M      | Familial        | CL                  | 7q36.2   | 153118877-153487764    | 368 888   | Gain | <i>DPP6</i> exonic                                              | Paternal    | <i>DPP6</i>             | qPCR                           | (1 brother with ASD, 1 non-ASD brother and 1 non-ASD sister, not tested)                           | ASD (based on ADI and ADOS), normal IQ, below average language (1%ile), no epilepsy, no dysmorphic features                                                                                                                                                                         | Father unaffected                      |
| 16 | 5130_3 | M      | Familial        | Blood               | 7q36.2   | 153742175-153788452    | 46 278    | Loss | <i>DPP6</i> exonic                                              | Paternal    | <i>DPP6</i>             | qPCR, Illumina 1M-duo for sib  | present in 1 brother with ASD                                                                      | Autism (based on ADI-R and ADOS), average IQ, oxygen deprivation at birth, tonic clonic seizures from birth to age 6 m, treated with phenobarbital until age 18 m, seizure free since then; right ptosis, no dysmorphic features                                                    | Father unaffected                      |



| #  | AGP ID | Gender | ASD family type            | Tissue <sup>a</sup> | Cytoband | Start-End <sup>b</sup> | Size (bp) | CNV  | RefSeq Genes                                                                                                      | Inheritance | Assay location/ Gene         | Method                         | Segregation in sibs                                        | Phenotype                                                                                                                                                                                                                                                                                                                                                                                                                                                                       | Parental phenotype                               |
|----|--------|--------|----------------------------|---------------------|----------|------------------------|-----------|------|-------------------------------------------------------------------------------------------------------------------|-------------|------------------------------|--------------------------------|------------------------------------------------------------|---------------------------------------------------------------------------------------------------------------------------------------------------------------------------------------------------------------------------------------------------------------------------------------------------------------------------------------------------------------------------------------------------------------------------------------------------------------------------------|--------------------------------------------------|
| 17 | 5354_3 | F      | Sporadic                   | Blood               | 8p23.1   | 10653990-10729568      | 75 579    | Loss | <i>PINX1</i> exonic                                                                                               | Paternal    | <i>PINX1</i>                 | qPCR, Illumina 1M-duo for sib  | 1 non-ASD sister, no CNV                                   | Autism (based on ADI-R and ADOS), below average IQ (1%ile), below average language (<1%ile), no epilepsy, no dysmorphic features                                                                                                                                                                                                                                                                                                                                                | Father unaffected, with some social difficulties |
| 18 | 5275_3 | F      | Sporadic (identical twins) | Blood               | 9p24.3   | 288719-676170          | 387 452   | Gain | <i>DOCK8</i> exonic, <i>KANK1</i> exonic                                                                          | Paternal    | <i>DOCK8</i>                 | qPCR                           | (1 MZ twin with ASD, not tested)                           | ASD (based on ADI-R and ADOS), low average nonverbal IQ (13%ile), below average language (2%ile), no epilepsy, no dysmorphic features                                                                                                                                                                                                                                                                                                                                           | Father unaffected                                |
| 19 | 5136_4 | M      | Familial                   | Blood               | 9q34.3   | 138753347-138762844    | 9 498     | Loss | <i>LCN10</i> , <i>LCN6</i> , <i>LCN8</i>                                                                          | Maternal    | <i>LCN10</i>                 | qPCR                           | (1 brother with ASD and 1 non-ASD half-sister, not tested) | Autism (based on ADI-R and ADOS), average IQ, language delay, no epilepsy, no dysmorphic features                                                                                                                                                                                                                                                                                                                                                                               | Mother depression                                |
| 20 | 5136_4 | M      | Familial                   | Blood               | 12p13.33 | 2115897-2127756        | 11 860    | Loss | <i>CACNA1C</i> intronic                                                                                           | Paternal    | <i>CACNA1C</i>               | qPCR                           | (see above)                                                | (see above)                                                                                                                                                                                                                                                                                                                                                                                                                                                                     | Father unaffected, some obsessive behavior noted |
| 21 | 5262_4 | M      | Sporadic                   | CL                  | 10q11.21 | 42600836-43271395      | 670 560   | Gain | <i>BMS1</i> , <i>CSGALNACT2</i> , <i>FXD4</i> , <i>HNRNPF</i> , <i>RASGEF1A</i> , <i>RET</i> , <i>ZNF487</i>      | Paternal    | not in gene                  | qPCR, Illumina 1M-duo for sibs | 1 non-ASD brother and 1 non-ASD sister, no CNV in either   | Autism (based on ADI-R and ADOS), anxiety symptoms, below average non-verbal IQ (4%ile), below average language (<1%ile), cleft palate, congenital diaphragmatic hernia, epilepsy, recurrent ear infections, short stature, alopecia in left parietal area, hypertelorism, epicanthic folds, small ears with curved pinnae, smooth philtrum, fifth finger clinodactyly, hyperextensibility, scoliosis. This patient also has a <i>de novo</i> 16p11.2 microduplication syndrome | Father unaffected, cleft palate                  |
| 22 | 5349_3 | M      | Sporadic                   | CL                  | 10q21.1  | 58409439-58421439      | 12 001    | Gain | —                                                                                                                 | Paternal    | not in gene                  | qPCR                           | (1 non-ASD brother and 1 non-ASD sister, not tested)       | Autism (based on ADI-R and ADOS), below average nonverbal IQ (<1%ile), below average language (<1%ile), no epilepsy                                                                                                                                                                                                                                                                                                                                                             | Father unaffected                                |
| 23 | 5004_3 | M      | Familial                   | Blood               | 10q26.3  | 134591133-134689210    | 98 078    | Gain | <i>C10orf93</i> whole                                                                                             | Paternal    | not in gene                  | qPCR, Illumina 1M-duo for sib  | present in 1 brother with autism                           | Autism (based on ADI-R and ADOS), below average nonverbal IQ (<1%ile), language delay, no epilepsy, no dysmorphic features                                                                                                                                                                                                                                                                                                                                                      | Father unaffected                                |
| 24 | 5004_3 | M      | Familial                   | Blood               | 12p13.33 | 2115897-2127756        | 11 860    | Loss | <i>CACNA1C</i> intronic                                                                                           | Maternal    | <i>CACNA1C</i>               | qPCR, Illumina 1M-duo for sib  | 1 brother with autism, no CNV                              | (see above)                                                                                                                                                                                                                                                                                                                                                                                                                                                                     | Mother unaffected                                |
| 25 | 5017_3 | M      | Familial                   | CL                  | 10q26.3  | 135134088-135230489    | 59 332    | Gain | <i>CYP2E1</i> , <i>LOC619207</i> , <i>SYCE1</i>                                                                   | Maternal    | <i>FLJ00268</i>              | qPCR                           | (1 brother with autism, not tested)                        | Autism (based on ADI-R and ADOS), MR (unable to complete IQ measure), below average language (1 %ile), no epilepsy, no dysmorphic features                                                                                                                                                                                                                                                                                                                                      | Mother unaffected                                |
| 26 | 5263_3 | M      | Sporadic                   | Blood               | 11p15.4  | 5397196-5454375        | 57 180    | Gain | <i>OR51I1</i> , <i>OR51I2</i> , <i>OR51Q1</i>                                                                     | Maternal    | not in gene                  | qPCR                           | (1 non-ASD brother with possible ADHD, not tested)         | Autism (based on ADI and ADOS), below average IQ (<1%ile), below average language (1%ile), no epilepsy, no dysmorphic features                                                                                                                                                                                                                                                                                                                                                  | Mother unaffected                                |
| 27 | 5263_3 | M      | Sporadic                   | Blood               | 15q11.2  | 20235613-20807351      | 571 739   | Gain | <i>CYFIP1</i> , <i>GOLGA9P</i> , <i>LOC283767</i> , <i>NIPA1</i> , <i>NIPA2</i> , <i>TUBGCP5</i> , <i>WHDC1L1</i> | Maternal    | <i>CYFIP1</i> , <i>NIPA1</i> | qPCR                           | (see above)                                                | (see above)                                                                                                                                                                                                                                                                                                                                                                                                                                                                     | (see above)                                      |
| 28 | 5119_3 | F      | Familial                   | CL                  | 11q23.3  | 117452643-117537452    | 84 810    | Gain | <i>SCN2B</i> , <i>SCN4B</i> , <i>TMPRSS4</i>                                                                      | Paternal    | <i>TMPRSS4</i>               | qPCR                           | (1 sister with autism, not tested)                         | Autism (based on ADI-R and ADOS), average nonverbal IQ, language delay, no epilepsy; coarse facial features, high hairline, frontal bossing, hypertelorism, clinodactyly                                                                                                                                                                                                                                                                                                        | Father unaffected                                |
| 29 | 5106_3 | M      | Familial                   | Blood               | 12p13.33 | 2115897-2127756        | 11 860    | Loss | <i>CACNA1C</i> intronic                                                                                           | Maternal    | <i>CACNA1C</i>               | qPCR                           | CNV present in 1 sister with autism (5106-4)               | ASD (based on ADI-R and ADOS), below average non-verbal IQ (<1%ile), language delay, no epilepsy, no dysmorphic features, CT scan normal. Sister (5106_4): Autism (based on ADI-R and ADOS), below average non-verbal IQ (<1%ile), language delay, no dysmorphic features                                                                                                                                                                                                       | Mother unaffected                                |

| #  | AGP ID | Gender | ASD family type                             | Tissue <sup>a</sup> | Cytoband      | Start-End <sup>b</sup> | Size (bp) | CNV  | RefSeq Genes                                                                  | Inheritance | Assay location/ Gene     | Method                                                       | Segregation in sibs                                                                                  | Phenotype                                                                                                                                                                        | Parental phenotype                            |
|----|--------|--------|---------------------------------------------|---------------------|---------------|------------------------|-----------|------|-------------------------------------------------------------------------------|-------------|--------------------------|--------------------------------------------------------------|------------------------------------------------------------------------------------------------------|----------------------------------------------------------------------------------------------------------------------------------------------------------------------------------|-----------------------------------------------|
| 30 | 5106_3 | M      | Familial                                    | Blood               | 12p13.32      | 3244089-3279231        | 35 143    | Gain | <i>TSPAN9</i> exonic                                                          | Paternal    | <i>TSPAN9</i>            | qPCR, Affy500K (Marshall AJHG 2008), Illumina 1M-duo for sib | CNV present in 1 sister with autism (5106-4)                                                         | (see above)                                                                                                                                                                      | Father unaffected                             |
| 31 | 5347_3 | M      | Sporadic                                    | CL                  | 12p13.31      | 9760538-9911534        | 150 997   | Loss | <i>CD69, CLEC2B, CLECL1, KLRF1</i>                                            | Paternal    | <i>CD69</i>              | qPCR                                                         | (1 non-ASD sister, not tested)                                                                       | Autism (based on ADI-R and ADOS), average IQ, language delay, no epilepsy, no dysmorphic features                                                                                | Father unaffected, mild academic difficulties |
| 32 | 5065_3 | M      | Familial                                    | Blood               | 12p13.33      | 2115897-2127756        | 11 860    | Loss | <i>CACNA1C</i> intronic                                                       | Paternal    | <i>CACNA1C</i>           | qPCR                                                         | (1 brother with autism, not tested)                                                                  | Autism (based on ADI-R and ADOS), below average nonverbal IQ (<1%ile), language delay, no epilepsy, spina bifida occulta, high arched palate, no other dysmorphic features noted | Father unaffected                             |
| 33 | 5065_3 | M      | Familial                                    | Blood               | Xp22.11       | 22860224-22923580      | 63 356    | Loss | upstream of <i>DDX53</i>                                                      | Maternal    | upstream of <i>DDX53</i> | qPCR                                                         | 1 brother with autism, no CNV                                                                        | (see above)                                                                                                                                                                      | Mother unaffected                             |
| 34 | 5250_4 | M      | Familial                                    | Blood               | 15q11.2       | 20303106-20800564      | 497 459   | Gain | <i>CYFIP1, GOLGA9P, HERC2P2, LOC283767, NIPA1, NIPA2, TUBGCP5, WHDC1L1</i>    | Paternal    | <i>TUBGCP5, CYFIP1</i>   | qPCR, Illumina 1M-duo for sib                                | present in 1 brother with ASD (5250_3)                                                               | Autism (based on ADI-R and ADOS), below average IQ (<1%ile), no epilepsy, adherent ear lobes                                                                                     | Father unaffected                             |
| 35 | 5250_4 | M      | Familial                                    | Blood               | 20p12.1       | 14729684-14773787      | 44 104    | Loss | <i>MACROD2</i> intronic                                                       | Paternal    | <i>MACROD2</i>           | qPCR                                                         | (1 brother with ASD, no CNV data)                                                                    | (see above)                                                                                                                                                                      | (see above)                                   |
| 36 | 5453_4 | M      | Sporadic (but has a second cousin affected) | Blood               | 15q11.2       | 20303106-20836955      | 533 850   | Loss | <i>HERC2P2, CYFIP1, NIPA2, NIPA1, TUBGCP5, WHDC1L1, GOLGA9P</i>               | Paternal    | <i>CYFIP1, NIPA1</i>     | qPCR, Agilent 1M, Illumina 1M-duo for sibs                   | 2 non-ASD brothers, no CNV                                                                           | Autism (based on ADI-R and ADOS), low-functioning (unable to complete IQ measure), language delay, no epilepsy, no dysmorphic features                                           | Father unaffected                             |
| 37 | 5453_4 | M      | (see above)                                 | Blood               | 22q12.1       | 25718110-25730447      | 12 338    | Gain | —                                                                             | Maternal    | not in gene              | qPCR                                                         | 1 non-ASD brother, no CNV (another non-ASD brother, no CNV data)                                     | (see above)                                                                                                                                                                      | Mother unaffected                             |
| 38 | 5225_3 | M      | Sporadic                                    | Blood               | 15q13.1-q13.2 | 26887815-28157206      | 1 269 392 | Gain | <i>TJP1, KIAA0574, NDNL2, APBA2</i>                                           | Paternal    | <i>APBA2</i>             | qPCR, Agilent 1M, Illumina 1M-duo for sibs                   | present in 1 brother (5225_4, under phenotype assessment) and 1 sister (5225_5, mild cerebral palsy) | Autism (based on ADI-R and ADOS)                                                                                                                                                 | Mother has cerebral palsy                     |
| 39 | 5114_3 | M      | Familial                                    | CL                  | 15q15.3       | 42350178-42386578      | 36 401    | Loss | <i>CASC4</i> exonic                                                           | Maternal    | <i>CASC4</i>             | qPCR                                                         | 1 brother with autism, no CNV                                                                        | Autism (based on ADI-R and ADOS), low average IQ, no language delay, no epilepsy, no dysmorphic features                                                                         | NA                                            |
| 40 | 5258_3 | M      | Sporadic                                    | Blood               | 16p13.11      | 15387380-16270740      | 883 360   | Gain | <i>MYH11, KIAA0430, C16orf63, MPV17L, NOMO3, NDE1, C16orf45, ABCC6, ABCC1</i> | Paternal    | <i>NDE1</i>              | qPCR, Illumina 1M-duo for sib                                | 1 non-ASD paternal half-sister, no CNV                                                               | Autism (based on ADI-R and ADOS), average IQ, language delay, hx of torticollis and hydrocele, no epilepsy, brain CT normal; <a href="#">16p13.11 microduplication</a>           | Father unaffected                             |

| #  | AGP ID | Gender | ASD family type                       | Tissue <sup>a</sup> | Cytoband | Start-End <sup>b</sup> | Size (bp) | CNV  | RefSeq Genes                                                | Inheritance | Assay location/<br>Gene                 | Method                                        | Segregation in sibs                                                              | Phenotype                                                                                                                                                                                                                                                                                                                                                                                                                                                                                                    | Parental phenotype                                  |
|----|--------|--------|---------------------------------------|---------------------|----------|------------------------|-----------|------|-------------------------------------------------------------|-------------|-----------------------------------------|-----------------------------------------------|----------------------------------------------------------------------------------|--------------------------------------------------------------------------------------------------------------------------------------------------------------------------------------------------------------------------------------------------------------------------------------------------------------------------------------------------------------------------------------------------------------------------------------------------------------------------------------------------------------|-----------------------------------------------------|
| 41 | 5208_3 | M      | Familial                              | Blood               | 16p13.2  | 8636625-8714816        | 78 192    | Gain | <i>ABAT</i> exonic, <i>C16orf68</i> exonic                  | Paternal    | <i>ABAT</i>                             | qPCR, Illumina 1M-duo for sib                 | 1 brother with autism, no CNV                                                    | ASD (based on ADI-R and ADOS), above average nonverbal IQ, low average language, no epilepsy; mother treated with valproic acid for epilepsy during pregnancy, fetal tachycardia during labor, forceps delivery at 33 1/2 wks, poor respiratory effort, on ventilation; CT scan: mild cortical atrophy, normal EEGs; neurological exam: tight hamstrings, toe walking; dysmorphic features: thin upper lip, small chin, flattened naso-labial fold, flattened occiput, small hands/fingers, lingual frenulum | Father unaffected, mild academic difficulties       |
| 42 | 5208_3 | M      | Familial                              | Blood               | 16q23.1  | 74997300-75007489      | 10 190    | Loss | <i>CNTNAP4</i> intronic                                     | Maternal    | <i>CNTNAP4</i>                          | qPCR, Illumina 1M-duo for sib                 | 1 brother with autism, no CNV                                                    | (see above)                                                                                                                                                                                                                                                                                                                                                                                                                                                                                                  | Mother unaffected                                   |
| 43 | 5108_3 | M      | Familial                              | CL                  | 19q13.32 | 52318905-52334620      | 15 716    | Gain | <i>SAE1</i> exonic                                          | Paternal    | <i>SAE1</i>                             | qPCR                                          | (1 brother with autism, not tested)                                              | ASD (based on ADI-R and ADOS), average IQ, no language delay, no epilepsy, normal physical and neurological exams                                                                                                                                                                                                                                                                                                                                                                                            | Father unaffected                                   |
| 44 | 5228_3 | F      | Sporadic                              | CL                  | 19q13.42 | 59844904-59870590      | 25 687    | Gain | <i>LILRB4</i> exonic                                        | Maternal    | <i>LILRB4</i> , <i>LIR5</i>             | qPCR                                          | (1 non-ASD brother, SLI, hyperlexic, not tested)                                 | ASD (based on ADI-R and ADOS), average non-verbal IQ (42%ile), below average language (3%ile), no epilepsy, no dysmorphic features                                                                                                                                                                                                                                                                                                                                                                           | Mother unaffected                                   |
| 45 | 5021_5 | M      | Familial                              | CL                  | 20p12.1  | 14999717-15091806      | 92 090    | Loss | <i>MACROD2</i> intronic                                     | Paternal    | <i>MACROD2</i>                          | qPCR                                          | (1 non-ASD brother and 1 sister with autism, not tested)                         | Autism (based on ADI-R and ADOS), average non-verbal IQ (55%ile), below average language (<1%ile), no epilepsy, no dysmorphic features                                                                                                                                                                                                                                                                                                                                                                       | Father unaffected                                   |
| 46 | 5061_3 | M      | Familial                              | Blood               | 20p12.1  | 14820313-14879494      | 59 182    | Loss | <i>MACROD2</i> intronic                                     | Maternal    | <i>MACROD2</i>                          | qPCR, Illumina 1M-duo for sibs                | 1 brother with ASD and 1 with autism, no CNV in either                           | ASD (based on ADI-R and ADOS), below average IQ (<1%ile), no epilepsy, premature (28 wks), brain dysfunction, soft neurological signs, amblyopia, hair whorls, 5th finger clinodactyly, long 3rd toe, toe syndactyly                                                                                                                                                                                                                                                                                         | Mother unaffected                                   |
| 47 | 5066_4 | M      | Familial                              | Blood               | 20p12.1  | 14818398-14879494      | 61 097    | Loss | <i>MACROD2</i> intronic                                     | Maternal    | <i>MACROD2</i>                          | qPCR                                          | (1 brother with autism and 1 non-ASD brother, not tested)                        | Autism (based on ADI-R and ADOS), average IQ, language delay, no epilepsy, malformed ears                                                                                                                                                                                                                                                                                                                                                                                                                    | Mother unaffected                                   |
| 48 | 5244_3 | M      | Sporadic                              | Blood               | 20p12.1  | 14778453-14888687      | 110 235   | Loss | <i>MACROD2</i> intronic                                     | Paternal    | <i>MACROD2</i>                          | qPCR, Illumina 1M-duo for sibs                | present in 1 non-ASD brother; 1 non-ASD sister, no CNV                           | Autism (based on ADI-R and ADOS), above average non-verbal IQ (95%ile), average language (55%ile), apraxia, possible seizures, microcephaly                                                                                                                                                                                                                                                                                                                                                                  | Father unaffected; mother has epilepsy              |
| 49 | 5147_9 | M      | Familial                              | CL                  | 21q21.1  | 18979790-19000295      | 20 505    | Gain | no gene, BC028044 transcript                                | Maternal    | BC028044                                | qPCR, Agilent 1M                              | (2 non-ASD sisters and 1 maternal first-degree male cousin with ASD, not tested) | Autism (based on ADI-R and ADOS), low average IQ, language delay, no epilepsy, no dysmorphic features                                                                                                                                                                                                                                                                                                                                                                                                        | Mother unaffected                                   |
| 50 | 5261_4 | F      | Familial                              | Blood               | 22q11.21 | 17257787-19795780      | 2 537 993 | Gain | 34 genes                                                    | Paternal    | <i>SNAP29</i> , <i>TBX1</i>             | qPCR, Illumina 1M-duo for sibs                | 1 maternal half-brother with autism and 1 non-ASD sister; no CNV in either       | Autism (based on ADI and ADOS), above average non-verbal IQ (96%ile), below average language (4%ile), no epilepsy, no dysmorphic features; <a href="#">22q11 duplication syndrome</a>                                                                                                                                                                                                                                                                                                                        | Father unaffected                                   |
| 51 | 5378_3 | M      | Familial                              | Blood               | 22q11.21 | 19063495-19358946      | 295 452   | Gain | <i>MED15</i> , <i>SCARF2</i> , <i>ZNF74</i> , <i>KLHL22</i> | Paternal    | intergenic region close to <i>MED15</i> | qPCR                                          | present in 1 brother with ASD                                                    | Autism (based on ADI-R and ADOS), unable to complete IQ measure, below average language (1%ile), no epilepsy, sleep problems. Brother: ASD (based on ADI-R and ADOS), normal IQ, sleep problems                                                                                                                                                                                                                                                                                                              | Father unaffected                                   |
| 52 | 5111_3 | M      | Familial                              | Blood               | Xp22.11  | 22844170-22897714      | 53 544    | Loss | upstream of <i>DDX53</i>                                    | Maternal    | upstream of <i>DDX53</i>                | qPCR, Illumina 1M-duo for sibs                | 1 brother with autism, no CNV; present in 1 non-ASD sister                       | Autism (based on ADI-R and ADOS), below average nonverbal IQ (<1%ile), language delay, non-verbal at age 8, no epilepsy, physical examination normal except for some mild dysmorphic facial features and a large head circumference; brain MRI normal                                                                                                                                                                                                                                                        | Mother unaffected, some academic difficulties noted |
| 53 | 5298_3 | M      | Sporadic (2nd degree cousin Asperger) | Blood               | Xp22.11  | 22892380-23013494      | 121 114   | Loss | <i>DDX53</i> exonic, upstream of <i>PTCHD1</i>              | Maternal    | <i>DDX53</i>                            | qPCR, Agilent 1M and Illumina 1M-duo for sibs | present in 1 non-ASD sister (5298_4)                                             | Autism (based on ADI-R and ADOS), moderate MR; severe language impairment, speech and oral motor deficit; possible history of seizures; pes planus and genu varus bilaterally, no other dysmorphic features; normal brain CT scan                                                                                                                                                                                                                                                                            | Mother unaffected                                   |

| #  | AGP ID | Gender | ASD family type | Tissue <sup>a</sup> | Cytoband      | Start-End <sup>b</sup> | Size (bp) | CNV  | RefSeq Genes                                  | Inheritance  | Assay location/<br>Gene        | Method                         | Segregation in sibs                                                                                                                                | Phenotype                                                                                                                                                                                                                                                                       | Parental phenotype                                                             |
|----|--------|--------|-----------------|---------------------|---------------|------------------------|-----------|------|-----------------------------------------------|--------------|--------------------------------|--------------------------------|----------------------------------------------------------------------------------------------------------------------------------------------------|---------------------------------------------------------------------------------------------------------------------------------------------------------------------------------------------------------------------------------------------------------------------------------|--------------------------------------------------------------------------------|
| 54 | 5240_4 | M      | Familial        | Blood               | Xp22.11       | 23116188-23280628      | 164 441   |      | <i>PTCHD1</i> exonic                          | Maternal     | <i>PTCHD1</i>                  | qPCR, Illumina 1M-duo for sibs | present in 1 DZ twin brother with autism (5240_5) and 1 non-ASD sister (5240_3)                                                                    | Autism (based on ADI and ADOS), average non-verbal IQ (42%ile), low average language (18%ile), no epilepsy, sleep problems, no dysmorphic features. DZ twin brother: Autism (based on ADI and ADOS), average IQ                                                                 | Mother unaffected, some academic difficulties noted                            |
| 55 | 5036_4 | M      | Familial        | CL                  | Xp21.2        | 29446046-29557942      | 111 897   | Loss | <i>IL1RAPL1</i> intronic                      | Maternal     | <i>IL1RAPL1</i>                | qPCR, Agilent 1M               | present in 1 sister with Asperger and 1 non-ASD DZ triplet brother; absent in 1 non-ASD DZ triplet brother and 1 non-ASD sister                    | Autism (based on ADI and ADOS), average non-verbal IQ (32%ile), below average language (1%ile), no epilepsy, no dysmorphic features; triplet with 2 non-ASD brothers                                                                                                            | Mother unaffected                                                              |
| 56 | 5126_4 | M      | Familial        | CL                  | Xp21.3-Xp21.2 | 28931559-29478966      | 547 408   | Gain | <i>IL1RAPL1</i> exonic                        | Maternal     | <i>IL1RAPL1</i>                | qPCR, Agilent 1M               | (1 brother with ASD, average IQ, epilepsy, abnormal brain MRI, no DNA) 4 unaffected sisters: CNV present in 2, absent in 1, no DNA for the other 2 | Autism (based on ADI-R and ADOS), anxiety disorder, low average IQ (5%ile), delayed language development, sat at 6 m and walked at 12 m, health history uneventful except for asthma as an infant. When last evaluated at age 10 y, no obvious muscular difficulties were noted | Mother unaffected                                                              |
| 57 | 5126_4 | M      | Familial        | CL                  | Xp21.1        | 32948977-33330592      | 381 615   | Gain | <i>DMD</i> exonic                             | Maternal     | <i>DMD</i>                     | Agilent 1M                     | (see above)                                                                                                                                        | (see above)                                                                                                                                                                                                                                                                     | (see above)                                                                    |
| 58 | 5241_3 | M      | Familial        | Blood               | Xp21.1        | 31793278-31822704      | 29 427    | Loss | <i>DMD</i> exonic; exon 48                    | Maternal     | <i>DMD</i>                     | qPCR                           | 1 brother with ASD, no CNV                                                                                                                         | Autism (based on ADI-R and ADOS), low non-verbal IQ (9%ile), average language (47%ile), no language delay, no epilepsy, right 2-3 toe syndactyly, right ear malformation                                                                                                        | Mother anxiety disorder, OCD, history of seizures, mild attention difficulties |
| 59 | 5007_3 | M      | Familial        | Blood               | Xp11.3        | 46255974-46292959      | 36 986    | Gain | <i>LOC401588</i> whole, <i>ZNF674</i> exonic  | Maternal     | <i>ZNF674</i>                  | qPCR, Illumina 1M-duo for sibs | 1 brother with autism and 1 non-ASD brother, no CNV in either                                                                                      | Autism (based on ADI-R and ADOS), anxiety, below average IQ, language delay, no epilepsy, no dysmorphic features                                                                                                                                                                | Mother unaffected                                                              |
| 60 | 5419_3 | M      | Sporadic        | CL                  | Xp11.4        | 41441499-41478503      | 37 005    | Gain | <i>CASK</i> intronic, <i>GPR82</i> whole      | Maternal     | <i>CASK</i>                    | qPCR                           | (no sibs)                                                                                                                                          | Autism (based on ADI-R and ADOS), no epilepsy; long, wide palpebral fissures, wide mouth, protruding ears, no other dysmorphic features                                                                                                                                         | NA                                                                             |
| 61 | 5209_3 | M      | Familial        | CL                  | Xq21.33       | 95936387-95949943      | 13 557    | Gain | <i>DIAPH2</i> intronic                        | Maternal     | <i>DIAPH2</i>                  | qPCR                           | present in 1 brother with autism (5209_4); absent in 1 non-ASD sister                                                                              | Autism (based on ADI-R and ADOS), average nonverbal IQ (50%ile), below average language (<1%ile), no epilepsy, no dysmorphic features                                                                                                                                           | Mother unaffected                                                              |
| 62 | 5468_3 | M      | Sporadic        | Blood               | Xq22.3        | 107765808-107890152    | 124 345   | Gain | <i>COL4A5</i> exonic, <i>IRS4</i> whole       | Maternal     | <i>IRS4</i> , <i>COL4A5</i>    | qPCR, Illumina 1M-duo for sib  | present in 1 non-ASD sister                                                                                                                        | Autism (based on ADI-R and ADOS), average nonverbal IQ (27%ile), below average language (<1%ile), no epilepsy, no dysmorphic features                                                                                                                                           | Mother unaffected                                                              |
| 63 | 5286_3 | M      | Sporadic        | Blood               | Xq28          | 148493841-148543935    | 50 095    | Loss | <i>HSFX1</i> intronic, <i>TMEM185A</i> exonic | Maternal     | <i>HSFX1</i> , <i>TMEM185A</i> | qPCR, Illumina 1M-duo for sibs | present in 1 non-ASD brother and absent in 1 non-ASD maternal half-sister                                                                          | Autism (based on ADI-R and ADOS), below average non-verbal IQ (4%ile), below average language (1%ile), no epilepsy, no dysmorphic features                                                                                                                                      | NA                                                                             |
| 64 | 6180_4 | M      | Sporadic        | Blood               | 1p31.1        | 75508955-75788048      | 279 094   | Loss | <i>SLC44A5</i> exonic                         | Maternal     | <i>SLC44A5</i>                 | qPCR                           | (1 unaffected sister, no DNA)                                                                                                                      | Autism, severe MR, non verbal, normal physical exam, no epilepsy                                                                                                                                                                                                                | Mother Hashimoto's thyroiditis                                                 |
| 65 | 6340_3 | M      | Sporadic        | U (blood or CL)     | 1q25.1        | 172142024-172310899    | 168 876   | Gain | <i>RC3H1</i> whole, <i>SERPINC1</i>           | Paternal     | <i>RC3H1</i>                   | qPCR                           | (3 sibs, no DNA)                                                                                                                                   | Autism, mild MR, no language delay, chronic otitis, normal physical exam, no epilepsy, brain MRI: Arnold Chiari type I                                                                                                                                                          | Father unaffected                                                              |
| 66 | 6340_3 | M      | Sporadic        | U (blood or CL)     | 22q11.21      | 20247190-20277644      | 30 455    | Loss | <i>UBE2L3</i> exonic                          | Both parents | <i>UBE2L3</i>                  | qPCR                           | (see above)                                                                                                                                        | (see above)                                                                                                                                                                                                                                                                     | Father unaffected, mother bulimia                                              |
| 67 | 6125_4 | M      | Sporadic        | U (blood or CL)     | 2p16.3        | 50822312-50886363      | 64 052    | Loss | <i>NRXN1</i> intronic                         | Maternal     | <i>NRXN1</i>                   | qPCR                           | (1 healthy brother, no DNA)                                                                                                                        | Autism, moderate MR, hyperactivity, language delay, limited language, inguinal hernia, retrognathia, narrow palate, anteverted nares, 3rd finger clinodactyly. Two tonic-clonic seizures during adolescence, treated with Depakine; normal brain CT                             | Mother unaffected                                                              |

| #  | AGP ID | Gender | ASD family type                     | Tissue <sup>a</sup> | Cytoband | Start-End <sup>b</sup> | Size (bp) | CNV  | RefSeq Genes                                                                                                                 | Inheritance | Assay location/<br>Gene                                              | Method | Segregation in sibs                                                    | Phenotype                                                                                                                                                                                                                                                                                                                    | Parental phenotype               |
|----|--------|--------|-------------------------------------|---------------------|----------|------------------------|-----------|------|------------------------------------------------------------------------------------------------------------------------------|-------------|----------------------------------------------------------------------|--------|------------------------------------------------------------------------|------------------------------------------------------------------------------------------------------------------------------------------------------------------------------------------------------------------------------------------------------------------------------------------------------------------------------|----------------------------------|
| 68 | 6125_4 | M      | Sporadic                            | U (blood or CL)     | 22q11.21 | 19051464-19793730      | 742 267   | Gain | 17 genes                                                                                                                     | Paternal    | <i>ZNF74</i> ,<br><i>KLHL22</i> ,<br><i>MED15</i> ,<br><i>SNAP29</i> | MLPA   | (see above)                                                            | (see above)                                                                                                                                                                                                                                                                                                                  | Father unaffected                |
| 69 | 6197_4 | F      | UKN (Asperger suspected in brother) | Blood               | 2p16.3   | 50822312-50900862      | 78 551    | Gain | <i>NRXN1</i> intronic                                                                                                        | Maternal    | <i>NRXN1</i>                                                         | qPCR   | (1 healthy brother, no DNA)                                            | Autism, mild MR, phrase speech delay, irregularly implanted teeth, thin upper lip, physical exam otherwise normal, no epilepsy; normal brain CT                                                                                                                                                                              | Mother unaffected                |
| 70 | 6203_4 | M      | Sporadic                            | Blood               | 3q11.2   | 94994003-95230688      | 236 686   | Gain | <i>STX19</i> exonic,<br><i>ARL13B</i> exonic,<br><i>PROS1</i> whole                                                          | Maternal    | <i>PROS1</i>                                                         | qPCR   | absent in 1 unaffected brother                                         | Autism, severe MR, language delay, normal physical exam, no epilepsy                                                                                                                                                                                                                                                         | Mother unaffected                |
| 71 | 6356_5 | M      | Sporadic                            | Blood               | 4q31.1   | 140478322-140522239    | 43 918    | Loss | <i>NARG1</i> exonic                                                                                                          | Paternal    | <i>NARG1</i>                                                         | qPCR   | (2 healthy sibs, no DNA)                                               | Autism, moderate MR, no language delay, normal physical exam, no epilepsy                                                                                                                                                                                                                                                    | Father unaffected                |
| 72 | 6356_5 | M      | Sporadic                            | Blood               | 16q24.1  | 82800294-82887663      | 87 370    | Loss | <i>WFDC1</i> exonic,<br><i>KCNG4</i> whole                                                                                   | Maternal    | <i>KCNG4</i>                                                         | qPCR   | (see above)                                                            | (see above)                                                                                                                                                                                                                                                                                                                  | Mother unaffected                |
| 73 | 6033_3 | M      | Familial                            | Blood               | 5p14.3   | 19532212-20357961      | 825 750   | Loss | <i>CDH18</i> exonic                                                                                                          | Maternal    | <i>CDH18</i>                                                         | qPCR   | absent in 1 sister with autism                                         | High-functioning autism, IQ above normal, early speech development, neonatal hypothyroidism, normal physical exam, no epilepsy                                                                                                                                                                                               | Mother unaffected                |
| 74 | 6127_3 | F      | Sporadic                            | Blood               | 7p15.1   | 29175877-29503232      | 327 356   | Gain | <i>CHN2</i> exonic                                                                                                           | Paternal    | <i>CHN2</i>                                                          | qPCR   | (1 healthy sister, no DNA)                                             | Autism, severe MR, language delay, normal physical exam, no epilepsy                                                                                                                                                                                                                                                         | Father unaffected                |
| 75 | 6266_3 | F      | Sporadic                            | Blood               | 7q35     | 145853798-145885593    | 31 796    | Gain | <i>CNTNAP2</i> intronic                                                                                                      | Maternal    | <i>CNTNAP2</i>                                                       | qPCR   | present in 1 brother with ADHD, absent in 1 healthy sister             | Autism, ADHD, sleep disorder, mild MR, language delay, normal physical exam, no epilepsy                                                                                                                                                                                                                                     | Mother unaffected                |
| 76 | 6320_4 | M      | Sporadic                            | Blood               | 7q35     | 145853798-145885593    | 31 796    | Gain | <i>CNTNAP2</i> intronic                                                                                                      | Maternal    | <i>CNTNAP2</i>                                                       | qPCR   | (3 healthy sibs, no DNA)                                               | Autism, low normal IQ, language delay, normal physical exam, no epilepsy, normal brain MRI                                                                                                                                                                                                                                   | Mother unaffected                |
| 77 | 6240_4 | M      | Sporadic                            | Blood               | 8q22.3   | 104451635-104607137    | 155 503   | Loss | <i>WDSOF1</i> ,<br><i>CTHRC1</i> , <i>RIMS2</i> ,<br><i>SLC25A32</i>                                                         | Paternal    | <i>RIMS2</i>                                                         | qPCR   | (1 healthy sister, not tested)                                         | Autism, mild MR, language delay, macrocephaly, automutilations, minor dysmorphic features (low ears, flat nose and nasal bridge, high forehead), normal neurological exam, no epilepsy, brain MRI: white matter abnormalities. This patient was also found to carry a 5.4 Mb <i>de novo</i> 11q deletion (Jacobsen syndrome) | Father unaffected                |
| 78 | 6191_3 | M      | Sporadic                            | U (blood or CL)     | 11q22.1  | 98412813-98476682      | 63 870    | Gain | <i>CNTN5</i> intronic                                                                                                        | Maternal    | <i>CNTN5</i>                                                         | qPCR   | absent in 1 unaffected sister (no DNA available for 1 brother with MR) | Autism, mild MR, no language delay, macrocephaly, no dysmorphic features, no epilepsy                                                                                                                                                                                                                                        | Mother unaffected                |
| 79 | 6362_3 | M      | Sporadic                            | Blood               | 14q31.1  | 78536692-78578318      | 41 627    | Loss | <i>NRXN3</i> intronic                                                                                                        | Paternal    | <i>NRXN3</i>                                                         | qPCR   | (1 healthy paternal half-sister, no DNA)                               | Autism, moderate MR, language delay, normal physical exam, no epilepsy, normal brain MRI                                                                                                                                                                                                                                     | Father dysthymia                 |
| 80 | 6319_3 | M      | Sporadic                            | Blood               | 15q11.2  | 20305097-20773130      | 468 034   | Loss | <i>NIPA2</i> , <i>NIPA1</i> ,<br><i>CYFIP1</i> ,                                                                             | Paternal    | <i>CYFIP1</i> ,<br><i>TUBGCP5</i>                                    | MLPA   | (1 healthy brother, no DNA)                                            | PDD-NOS, mild MR, language delay, functional language, no epilepsy, hypermetropia, no dysmorphic features, flat feet,                                                                                                                                                                                                        | Father unaffected                |
| 81 | 6261_3 | M      | Sporadic                            | Blood               | 16p12.1  | 21854731-22331199      | 476 469   | Loss | <i>EEF2K</i> ,<br><i>C16orf65</i> ,<br><i>CDR2</i> , <i>POLR3E</i> ,<br><i>C16orf52</i> ,<br><i>UQCRC2</i> ,<br><i>VWA3A</i> | Maternal    | <i>POLR3E</i> ,<br><i>VWA3A</i>                                      | qPCR   | (2 healthy sibs, no DNA)                                               | Autism, mild MR, language delay; hearing deficit detected at 1 y, treated with hearing aid, audiogram at 4 yrs normal; normal physical exam, no epilepsy, normal brain CT; <a href="#">16p12.1 microdeletion</a>                                                                                                             | Mother unaffected                |
| 82 | 6261_3 | M      | Sporadic                            | Blood               | 16p12.1  | 61650712-61824330      | 173 619   | Loss | <i>PRKCA</i> exonic,<br><i>APOH</i> exonic                                                                                   | Paternal    | <i>APOH</i>                                                          | qPCR   | (see above)                                                            | (see above)                                                                                                                                                                                                                                                                                                                  |                                  |
| 83 | 6164_3 | F      | Sporadic                            | U (blood or CL)     | 17q25.3  | 77760278-77802222      | 41 945    | Gain | <i>CCDC57</i> exonic,<br><i>SLC16A3</i> whole,<br><i>CSNK1D</i> exonic                                                       | Maternal    | <i>CSNK1D</i> ,<br><i>SLC64A</i>                                     | qPCR   | (1 healthy sister, no DNA)                                             | Autism, mild MR, language delay, functional language, sleep difficulties, normal physical exam, no epilepsy, normal brain MRI                                                                                                                                                                                                | Mother unaffected, breast cancer |

| #   | AGP ID     | Gender | ASD family type | Tissue <sup>a</sup> | Cytoband | Start-End <sup>b</sup> | Size (bp) | CNV  | RefSeq Genes                                                 | Inheritance  | Assay location/<br>Gene                    | Method     | Segregation in sibs                                                            | Phenotype                                                                                                                                                                                                          | Parental phenotype                                |
|-----|------------|--------|-----------------|---------------------|----------|------------------------|-----------|------|--------------------------------------------------------------|--------------|--------------------------------------------|------------|--------------------------------------------------------------------------------|--------------------------------------------------------------------------------------------------------------------------------------------------------------------------------------------------------------------|---------------------------------------------------|
| 84  | 6164_3     | F      | Sporadic        | U (blood or CL)     | Xq28     | 153248612-153264501    | 15 890    | Gain | <i>FLNA</i> exonic, <i>EMD</i> whole                         | Maternal     | <i>EMD</i>                                 | qPCR       | (see above)                                                                    | (see above)                                                                                                                                                                                                        | (see above)                                       |
| 85  | 6023_3     | M      | Familial        | U (blood or CL)     | 20p12.1  | 14948785-15161293      | 212 509   | Loss | <i>MACROD2</i> exonic                                        | Maternal     | <i>MACROD2</i>                             | qPCR       | present in 1 brother with PDD-NOS                                              | High-functioning autism, normal IQ, language delay, normal physical exam, no epilepsy                                                                                                                              | Mother unaffected                                 |
| 86  | 6057_3     | M      | Familial        | Blood               | 22q11.21 | 19221842-19341132      | 119 291   | Gain | <i>MED15</i>                                                 | Paternal     | <i>MED15</i>                               | qPCR, MLPA | present in 1 brother with autism                                               | Autism, MR, no phrases, normal physical exam, no epilepsy; brain MRI: white matter hyperintensities. Younger brother: autism, MR, no language, normal physical exam, no epilepsy; brain MRI: delayed myelinization | Father unaffected                                 |
| 87  | 6046_4     | M      | Familial        | Blood               | 22q13.33 | 49452422-49567307      | 114 886   | Gain | <i>SHANK3</i> , <i>ACR</i> , <i>RABL2B</i> , <i>MGC70863</i> | Both parents | <i>SHANK3</i> , <i>ACR</i> , <i>RABL2B</i> | qPCR, MLPA | present in 1 brother with autism                                               | Autism, severe MR, no language, normal physical exam, no epilepsy, normal brain MRI. Younger brother: autism, severe MR, no language, normal physical exam                                                         | Both parents unaffected                           |
| 88  | 6239_3     | M      | Sporadic        | U (blood or CL)     | Xp22.2   | 11324498-11418698      | 94 201    | Gain | <i>ARHGAP6</i> intronic                                      | Maternal     | <i>ARHGAP6</i>                             | qPCR       | (no sibs)                                                                      | Autism, severe MR, no language, strabism, no dysmorphic features, no epilepsy                                                                                                                                      | Mother unaffected                                 |
| 89  | 6239_3     | M      | Sporadic        | U (blood or CL)     | Xq27.1   | 138549326-138716662    | 167 337   | Gain | <i>MCF2</i> exonic, <i>ATP11C</i> exonic                     | Maternal     | <i>ATP11C</i>                              | qPCR       | (no sibs)                                                                      | (see above)                                                                                                                                                                                                        | Mother unaffected                                 |
| 90  | 6323_3     | M      | Sporadic        | U (blood or CL)     | Xp22.2   | 14603137-14746120      | 143       | Loss | <i>GLRA2</i> exonic                                          | Maternal     | <i>GLRA2</i>                               | qPCR       | (no sibs)                                                                      | Autism, normal IQ, language delay, bilateral myopia, normal physical exam, no epilepsy                                                                                                                             | Mother unaffected                                 |
| 91  | 6032_4     | F      | Familial        | U (blood or CL)     | Xp21.3   | 28732962-28751750      | 18 789    | Loss | <i>IL1RAPL1</i> intronic                                     | Paternal     | <i>IL1RAPL1</i>                            | qPCR       | absent in 1 maternal half-brother with autism, present in 1 healthy sister     | High-functioning autism, normal IQ, language delay, normal physical exam, no epilepsy                                                                                                                              | Father unaffected                                 |
| 92  | 6379_4     | M      | Sporadic        | U (blood or CL)     | Xq21.1   | 76915420-77030430      | 115 011   | Gain | <i>MAGT1</i> exonic                                          | Maternal     | <i>MAGT1</i>                               | qPCR       | (no sibs)                                                                      | Autism, mild MR, language delay, normal physical exam, no epilepsy                                                                                                                                                 | Mother OCD                                        |
| 93  | 13135_1523 | F      | UKN             | Blood               | 1q21.1   | 144838594-146308287    | 1 469 694 | Gain | 14 genes                                                     | Maternal     | <i>BCL9</i>                                | qPCR       | (1 brother with Aspergers and dyspraxia, not tested)                           | Autism, low average IQ, normal physical exam, no epilepsy; <a href="#">1q21.1 microduplication syndrome</a>                                                                                                        | Mother unaffected                                 |
| 94  | 13133_1503 | M      | Sporadic        | Blood               | 1q42.2   | 229977634-230015444    | 37 810    | Gain | <i>DISC1</i> exonic                                          | Maternal     | <i>DISC1</i>                               | qPCR       | (1 healthy sister, no DNA)                                                     | Autism, moderate-severe MR, non-verbal, normal physical exam, no epilepsy                                                                                                                                          | NA                                                |
| 95  | 13043_523  | M      | Sporadic        | Blood               | 15q11.2  | 21914925-22008680      | 93 755    | Gain | <i>PWRN2</i> whole                                           | Both parents | <i>PWRN2</i>                               | qPCR       | (1 healthy sister and 2 healthy DZ twin brothers, no DNA)                      | Autism, normal IQ, fluent speech, no epilepsy, narrow face, elongated ears, physical exam otherwise normal                                                                                                         | Father may have Asperger syndrome (not evaluated) |
| 96  | 13047_563  | M      | Familial        | Blood               | Xp22.11  | 22829183-23214712      | 385 529   | Loss | <i>DDX53</i> exonic, upstream of <i>PTCHD1</i>               | Maternal     | <i>DDX53</i>                               | qPCR       | (2 brothers with autism and 1 sister with pragmatic language disorder, no DNA) | ASD, normal IQ, no dysmorphic features, history of allergies and recurrent ear infections                                                                                                                          | Mother unaffected                                 |
| 97  | 3017_3     | M      | Familial        | Blood               | 2p12     | 76782603-76809810      | 27 207    | Loss | downstream of <i>LRRTM4</i>                                  | Paternal     | downstream of <i>LRRTM4</i>                | LR-PCR     | absent in 1 affected brother                                                   | Autism, moderate MR                                                                                                                                                                                                | NA                                                |
| 98  | 3160_3     | M      | Familial        | Blood               | 2p12     | 76782603-76809810      | 27 207    | Loss | downstream of <i>LRRTM4</i>                                  | Paternal     | downstream of <i>LRRTM4</i>                | LR-PCR     | present in 1 affected sister                                                   | Autism, normal IQ, no language delay                                                                                                                                                                               | Father unaffected                                 |
| 99  | 3092_3     | F      | Familial        | Blood               | 2p12     | 76782603-76809810      | 27 207    | Loss | downstream of <i>LRRTM4</i>                                  | Maternal     | downstream of <i>LRRTM4</i>                | LR-PCR     | absent in 1 affected brother                                                   | Autism, normal IQ                                                                                                                                                                                                  | Mother unaffected                                 |
| 100 | 3106_3     | M      | Familial        | Blood               | 2p12     | 76782603-76809810      | 27 207    | Loss | downstream of <i>LRRTM4</i>                                  | Paternal     | downstream of <i>LRRTM4</i>                | LR-PCR     | absent in 1 unaffected brother and 1 affected sister                           | Autism, normal IQ                                                                                                                                                                                                  | NA                                                |
| 101 | 3424_3     | M      | Sporadic        | Blood               | 2q23.1   | 148881443-149078468    | 197 025   | Gain | <i>MBD5</i> whole                                            | Maternal     | <i>MBD5</i>                                | qPCR       | absent in 1 unaffected brother                                                 | Autism, mild MR, relative macrocephaly, no dysmorphic features                                                                                                                                                     | Mother unaffected                                 |
| 102 | 3424_3     | M      | Sporadic        | Blood               | Xp22.11  | 23013250-23116188      | 102 939   | Loss | upstream of <i>PTCHD1</i>                                    | Maternal     | upstream of <i>PTCHD1</i>                  | qPCR       | absent in 1 unaffected brother                                                 | (see above)                                                                                                                                                                                                        | (see above)                                       |

| #   | AGP ID   | Gender | ASD family type | Tissue <sup>a</sup> | Cytoband | Start-End <sup>b</sup> | Size (bp) | CNV  | RefSeq Genes                                                      | Inheritance | Assay location/ Gene                            | Method | Segregation in sibs                                                                   | Phenotype                                                                                                                                                                                                                                                                                                                        | Parental phenotype                                                                                                                                                |
|-----|----------|--------|-----------------|---------------------|----------|------------------------|-----------|------|-------------------------------------------------------------------|-------------|-------------------------------------------------|--------|---------------------------------------------------------------------------------------|----------------------------------------------------------------------------------------------------------------------------------------------------------------------------------------------------------------------------------------------------------------------------------------------------------------------------------|-------------------------------------------------------------------------------------------------------------------------------------------------------------------|
| 103 | 3423_003 | M      | Sporadic        | Blood               | 2q31.1   | 170311824-170375059    | 63 236    | Loss | <i>KLHL23, SSB</i>                                                | Maternal    | <i>KLHL23, SSB</i>                              | qPCR   | (no sibs)                                                                             | Autism, moderate MR, no dysmorphic signs, weight >P97, height P90, head circumference P98                                                                                                                                                                                                                                        | Mother unaffected                                                                                                                                                 |
| 104 | 3211_3   | M      | Familial        | Blood               | 3p26.2   | 4069293-4236304        | 167 011   | Loss | <i>SUMF1</i> exonic                                               | Paternal    | <i>SUMF1</i>                                    | LR-PCR | absent in 1 affected brother                                                          | Autism, normal IQ, no language delay, height P97, head circumference P50, epicanthus, steeped palate, physical and neurological exam otherwise normal                                                                                                                                                                            | NA                                                                                                                                                                |
| 105 | 3211_3   | M      | Familial        | BBC                 | 16p11.2  | 29502984-30127026      | 624 043   | Gain | 37 genes                                                          | Maternal    | <i>IMAA</i>                                     | qPCR   | absent in 1 affected brother                                                          | (see above); <a href="#">16p11.2 microduplication syndrome</a>                                                                                                                                                                                                                                                                   | NA                                                                                                                                                                |
| 106 | 3319_3   | F      | Familial        | BBC                 | 3p26.2   | 4063576-4076356        | 12 780    | Loss | — ( <i>SUMF1</i> intron according to UCSC/Ensembl but not Refseq) | Maternal    | <i>SUMF1</i> (UCSC/Ensembl but not Refseq gene) | LR-PCR | present in 1 of 2 unaffected sisters but not in affected sister                       | Autism, MR, no functional language, no epilepsy                                                                                                                                                                                                                                                                                  | NA                                                                                                                                                                |
| 107 | 3072_008 | M      | Familial        | Blood               | 4q35.2   | 189540090-190704726    | 1 164 636 | Loss | None                                                              | Paternal    | 11 qPCR assays across region                    | qPCR   | (one affected cousin in maternal side of family, not tested)                          | Autism, normal IQ, language delay, no epilepsy, height P97, head circumference P98, mild eczema, no other associated medical or psychiatric problems                                                                                                                                                                             | NA                                                                                                                                                                |
| 108 | 3072_008 | M      | Familial        | Blood               | 4q35.2   | 190922297-190993476    | 71 179    | Loss | None                                                              | Paternal    | 11 qPCR assays across                           | qPCR   | (see above)                                                                           | (see above)                                                                                                                                                                                                                                                                                                                      | NA                                                                                                                                                                |
| 109 | 3081_5   | F      | Familial        | BBC                 | 7q31.1   | 110835815-110867477    | 31 663    | Loss | <i>IMMPL2</i> intronic                                            | Maternal    | <i>IMMPL2</i>                                   | LR-PCR | absent in 1 affected brother and 1 unaffected sister                                  | Autism, moderate to severe MR, no dysmorphic features, head circumference +2 SD, self-injurious behavior, no epilepsy                                                                                                                                                                                                            | NA                                                                                                                                                                |
| 110 | 3320_003 | M      | Familial        | Blood               | 7q31.1   | 110879714-110924988    | 45 274    | Loss | <i>IMMPL2L</i> exonic                                             | Paternal    | 7 qPCR assays across region                     | qPCR   | present in the unaffected sister, but absent in the brother with PDD-NOS              | Autism, no language delay, normal IQ, 40% hearing in one ear, no other associated medical or psychiatric problems, no epilepsy                                                                                                                                                                                                   | Father unaffected                                                                                                                                                 |
| 111 | 3018_3   | M      | Familial        | CL                  | 7q35     | 146059148-146251008    | 191 861   | Gain | <i>CNTNAP2</i> exonic                                             | Maternal    | <i>CNTNAP2</i>                                  | qPCR   | absent in 1 affected brother and 1 unaffected brother, present in 1 unaffected sister | High-functioning autism, delayed language; abnormal EEG without seizures, treated with carbamazepine; born at 38 wks, oxygen deprivation due to cord around neck, 48 h in ICU; eczema, hydronephrosis of right kidney, weight problem, gross motor difficulties, polydactyly on right hand and left foot, head circumference P98 | Mother unaffected, depression, psoriasis                                                                                                                          |
| 112 | 3307_3   | M      | Familial        | BBC                 | 8p23.1   | 6316818-6341678        | 24 861    | Loss | <i>MCPH1</i> exonic                                               | Paternal    | LR-PCR across deletion                          | LR-PCR | present in 1 unaffected brother, and absent in 2 affected sisters                     | Autism, average IQ, language delay, head circumference >P98, no dysmorphic features, no seizures                                                                                                                                                                                                                                 | Father unaffected                                                                                                                                                 |
| 113 | 3209_004 | M      | Familial        | Blood               | 10q21.3  | 66980652-66983475      | 2 823     | Loss | None                                                              | Paternal    | 8 qPCR assays across region                     | qPCR   | present in sister with autism                                                         | ADI and ADOS dx Autism, normal IQ, delay in single words but not in phrase speech, no other associated medical or psychiatric problems, no epilepsy. Sister: ADI and ADOS dx Autism, performance IQ 70, language delay, no other associated medical or psychiatric problems, no epilepsy                                         | Father unaffected                                                                                                                                                 |
| 114 | 3135_4   | M      | Familial        | Blood               | 10q21.3  | 67748487-67785209      | 36 723    | Loss | <i>CTNNA3</i> intronic                                            | Maternal    | <i>CTNNA3</i>                                   | LR-PCR | absent in 1 affected brother and 1 socially awkward sister (no ASD diagnosis)         | Autism, mild MR, language delay, head circumference P98, no dysmorphic features, no seizures                                                                                                                                                                                                                                     | Mother had two miscarriages. Maternal grandfather (not tested for CNV): partial complex seizures with transient speech arrest with good response to carbamazepine |
| 115 | 3156_3   | M      | Familial        | Blood               | 10q21.3  | 67741619-67788456      | 46 837    | Loss | <i>CTNNA3</i> intronic                                            | Paternal    | <i>CTNNA3</i>                                   | LR-PCR | absent in 1 sister with autism                                                        | Autism, mild MR, epilepsy                                                                                                                                                                                                                                                                                                        | NA                                                                                                                                                                |
| 116 | 3209_4   | M      | Familial        | Blood               | 10q21.3  | 67741619-67788456      | 46 837    | Loss | <i>CTNNA3</i> intronic                                            | Paternal    | <i>CTNNA3</i>                                   | LR-PCR | absent in 1 affected sibling                                                          | Autism, normal IQ, no language delay, no dysmorphic features, head circumference +2 SD, no epilepsy                                                                                                                                                                                                                              | NA                                                                                                                                                                |

| #   | AGP ID   | Gender | ASD family type | Tissue <sup>a</sup> | Cytoband | Start-End <sup>b</sup> | Size (bp) | CNV  | RefSeq Genes                                                                                                  | Inheritance | Assay location/ Gene                 | Method                                  | Segregation in sibs                                                                                                 | Phenotype                                                                                                                                                                                                                                                                                                                                                                                                                        | Parental phenotype                                                                                                  |
|-----|----------|--------|-----------------|---------------------|----------|------------------------|-----------|------|---------------------------------------------------------------------------------------------------------------|-------------|--------------------------------------|-----------------------------------------|---------------------------------------------------------------------------------------------------------------------|----------------------------------------------------------------------------------------------------------------------------------------------------------------------------------------------------------------------------------------------------------------------------------------------------------------------------------------------------------------------------------------------------------------------------------|---------------------------------------------------------------------------------------------------------------------|
| 117 | 3321_3   | M      | Familial        | Blood               | 10q21.3  | 67741619-67788456      | 46 837    | Loss | <i>CTNNA3</i> intronic                                                                                        | Maternal    | <i>CTNNA3</i>                        | LR-PCR                                  | absent in 1 sister with autism                                                                                      | Autism, normal IQ, no epilepsy                                                                                                                                                                                                                                                                                                                                                                                                   | NA                                                                                                                  |
| 118 | 3311_3   | M      | Familial        | Blood               | 10q21.3  | 67688367-67759307      | 70 941    | Loss | <i>CTNNA3</i> exonic                                                                                          | Maternal    | <i>CTNNA3</i>                        | LR-PCR                                  | present in 1 brother with PDD-NOS, absent in 1 affected brother                                                     | Autism, moderate MR, language delay, congenital cataract, amblyopia, seizures in infancy. Brother: PDD-NOS, language delay, amblyopia                                                                                                                                                                                                                                                                                            | NA                                                                                                                  |
| 119 | 3034_3   | M      | Familial        | Blood               | 10q21.3  | 68099569-68167094      | 67 525    | Loss | <i>CTNNA3</i> intronic                                                                                        | Paternal    | <i>CTNNA3</i>                        | LR-PCR                                  | absent in 1 affected sibling                                                                                        | Autism, low normal IQ, language delay, recurrent ear infections, no dysmorphic features, no epilepsy                                                                                                                                                                                                                                                                                                                             | Father type II diabetes                                                                                             |
| 120 | 3134_4   | M      | Familial        | Blood               | 10q21.3  | 67838960-67885161      | 46 202    | Loss | <i>CTNNA3</i> intronic                                                                                        | Maternal    | <i>CTNNA3</i>                        | LR-PCR                                  | present in 1 affected brother                                                                                       | Autism, moderate MR, phrase speech delay, no dysmorphic features, no seizures, born at 35 wks. Brother: autism, profound MR, language delay (non-verbal at time of evaluation), head circumference P98, no dysmorphic features, no seizures, left extremities decreased muscle function, flat feet, full-term, C-section due to cord around neck                                                                                 | Mother unaffected                                                                                                   |
| 121 | 3093_4   | M      | Familial        | Blood               | 10q21.3  | 67987089-68067310      | 80 222    | Loss | <i>CTNNA3</i> exonic                                                                                          | Maternal    | <i>CTNNA3</i>                        | LR-PCR                                  | absent in 1 brother with autism                                                                                     | Autism, mild MR                                                                                                                                                                                                                                                                                                                                                                                                                  | Mother unaffected                                                                                                   |
| 122 | 3169_4   | M      | Familial        | Blood               | 10q21.3  | 68029140-68183933      | 154 794   | Loss | <i>CTNNA3</i> exonic                                                                                          | Maternal    | <i>CTNNA3</i>                        | LR-PCR                                  | present in 1 affected brother                                                                                       | Autism, low average IQ                                                                                                                                                                                                                                                                                                                                                                                                           | Mother depression, anxiety                                                                                          |
| 123 | 3174_003 | M      | Familial        | Blood               | 16p12.1  | 21854731-22343312      | 488 582   | Loss | <i>EEF2K</i> , <i>C16orf65</i> , <i>CDR2</i> , <i>POLR3E</i> , <i>C16orf52</i> , <i>UQCRC2</i> , <i>VWA3A</i> | Paternal    | <i>POLR3E</i> , <i>VWA3A</i>         | qPCR, Agilent 1M                        | present in 1 brother with autism                                                                                    | ADI and ADOS dx Autism, low average IQ, language delay, gross and fine motor coordination difficulties, no dysmorphic features, no epilepsy; <a href="#">16p12.1 microdeletion</a> ; this patient also carries a de novo 3p24.3 deletion. Brother: ADI and ADOS dx Autism, low average IQ, language delay, some mild dysmorphic facial features, no epilepsy; <a href="#">16p12.1 microdeletion</a>                              | Evidence of broader autism phenotype (social and communication domains) in both parents, with father scoring higher |
| 124 | 3099_8   | M      | Familial        | CL                  | 16q21    | 60027157-61668976      | 1 641 819 | Loss | <i>CDH8</i> whole                                                                                             | Maternal    | <i>CDH8</i> , LR-PCR across deletion | LR-PCR, breakpoint sequencing, Affy 10K | present in 2 other affected brothers but not in 4 unaffected siblings                                               | All 3 affected siblings have ASD and MR (for more details see Vieland et al., submitted) (sequencing showed true deletion coordinates are chr16: 60025584–61667839)                                                                                                                                                                                                                                                              | Mother unaffected                                                                                                   |
| 125 | 3435_003 | F      | Sporadic        | Blood               | 18p11.21 | 11957792-12120394      | 162 603   | Loss | <i>IMPA2</i>                                                                                                  | Paternal    | <i>IMPA2</i>                         | qPCR                                    | present in an unaffected sister                                                                                     | Autism, mild MR, no dysmorphic signs, weight P90, height P50, head circumference P80                                                                                                                                                                                                                                                                                                                                             | Father unaffected                                                                                                   |
| 126 | 3181_7   | M      | Familial        | CL                  | 19q13.32 | 52467295-52645983      | 178 689   | Loss | <i>MEIS3</i> , <i>GPR77</i> , <i>CSAR1</i> , <i>LOC255783</i> , <i>SLC8A2</i> , <i>DHX34</i>                  | Maternal    | LR-PCR across deletion               | nested LR-PCR                           | no siblings; absent in affected cousin                                                                              | ADI and ADOS dx Autism, no language delay, higher than average IQ, no dysmorphic features, height and weight 2-9th centiles, no epilepsy                                                                                                                                                                                                                                                                                         | Mother unaffected                                                                                                   |
| 127 | 3127_4   | M      | Familial        | CL                  | 22q11.21 | 17257787-19793730      | 2 535 944 | Gain | 57 genes                                                                                                      | Paternal    | <i>HIRA</i> , <i>SNAP29</i>          | qPCR                                    | present in 1 affected brother                                                                                       | ASD, normal IQ, violent outbursts of aggression, severe learning difficulties, no language delay, articulation difficulties, limited and repetitive speech, abnormal EEG but no seizures, fine and gross motor problems, visuo-spatial difficulties, protruding tongue, several raised skin lesions (amelanotic and café au lait) on trunk, forehead and back of his neck (history of café au lait spots in the maternal family) | Father trouble reading and writing, problems with coordination, normal IQ                                           |
| 128 | 3067_5   | M      | Familial        | CL                  | 22q11.21 | 19051464-19795780      | 744 317   | Gain | 17 genes                                                                                                      | Paternal    | <i>SNAP29</i>                        | qPCR                                    | 4 sibs: CNV present in 1 affected brother; absent in 1 affected male, 1 male with mild PDD, and 1 unaffected sister | Autism, normal IQ, no epilepsy                                                                                                                                                                                                                                                                                                                                                                                                   | NA                                                                                                                  |
| 129 | 3253_4   | M      | Familial        | BBC                 | Xp22.11  | 22860224-22907454      | 47 231    | Loss | upstream of <i>PTCHD1</i>                                                                                     | Maternal    | upstream of <i>PTCHD1</i>            | qPCR                                    | absent in 1 brother with autism and 1 unaffected younger sister                                                     | Autism, mild MR                                                                                                                                                                                                                                                                                                                                                                                                                  | NA                                                                                                                  |



| #   | AGP ID     | Gender | ASD family type | Tissue <sup>a</sup> | Cytoband        | Start-End <sup>b</sup> | Size (bp) | CNV  | RefSeq Genes                                                   | Inheritance | Assay location/<br>Gene | Method | Segregation in sibs                                       | Phenotype                                                                                                                                                                                                                                                                                                            | Parental phenotype              |
|-----|------------|--------|-----------------|---------------------|-----------------|------------------------|-----------|------|----------------------------------------------------------------|-------------|-------------------------|--------|-----------------------------------------------------------|----------------------------------------------------------------------------------------------------------------------------------------------------------------------------------------------------------------------------------------------------------------------------------------------------------------------|---------------------------------|
| 130 | 3019_3     | M      | Familial        | BBC                 | Xp21.1          | 32100618-32315937      | 215 319   | Gain | <i>DMD</i> exonic                                              | Maternal    | <i>DMD</i>              | qPCR   | CNV present in affected brother, absent in healthy sister | Autism, normal IQ, articulation dyspraxia, poor coordination, odd head movements and frequent body contortions. Affected brother (3019_5) has a general developmental delay and as an adult has moderate learning difficulties. The medical notes do not mention any specific motor problems for either one of them. | NA                              |
| 131 | 14244_3680 | M      | Sporadic        | Blood               | 1p33            | 49688435-49770826      | 82 392    | Loss | <i>AGBL4</i> intronic                                          | Maternal    | <i>AGBL4</i>            | qPCR   | (no sibs)                                                 | ASD, normal IQ, phrase speech delay, no epilepsy, asthma, no dysmorphic features                                                                                                                                                                                                                                     | Mother depression               |
| 132 | 14246_3700 | M      | Sporadic        | Blood               | 1p33            | 49688435-49770826      | 82 392    | Loss | <i>AGBL4</i> intronic                                          | Maternal    | <i>AGBL4</i>            | qPCR   | (no sibs)                                                 | ASD, normal IQ, phrase speech delay, no epilepsy, no dysmorphic features                                                                                                                                                                                                                                             | Mother unaffected               |
| 133 | 14080_1360 | F      | Sporadic        | Blood               | 1p33            | 49688435-49770826      | 82 392    | Loss | <i>AGBL4</i> intronic                                          | Paternal    | <i>AGBL4</i>            | qPCR   | (1 healthy sister, 1 healthy brother, no DNA)             | Autism, moderate MR, no language, neurodevelopmental delay, no dysmorphic features, no epilepsy, sleep problems; great-uncle had autism                                                                                                                                                                              | Father unaffected               |
| 134 | 14239_2920 | M      | Sporadic        | Blood               | 1p33            | 49685647-49770826      | 85 180    | Loss | <i>AGBL4</i> intronic                                          | Maternal    | <i>AGBL4</i>            | qPCR   | (no sibs)                                                 | Autism, normal IQ, phrase speech delay, no epilepsy, no dysmorphic features                                                                                                                                                                                                                                          | Mother unaffected               |
| 135 | 14301_4220 | M      | Sporadic        | Blood               | 2q34            | 214808080-214829997    | 21 918    | Gain | <i>SPAG16</i> exonic                                           | Paternal    | <i>SPAG16</i>           | qPCR   | (1 healthy brother, no DNA)                               | Autism, normal IQ, phrase speech delay, no epilepsy, no dysmorphic features, vision problems (unspecific refraction defect)                                                                                                                                                                                          | Father unaffected               |
| 136 | 14309_4260 | M      | Sporadic        | Blood               | 2q34            | 214808080-214829997    | 21 918    | Gain | <i>SPAG16</i> exonic                                           | Paternal    | <i>SPAG16</i>           | qPCR   | (1 healthy brother, no DNA)                               | Autism, mild MR, phrase speech delay, no epilepsy, neurodevelopmental delay with onset at 2 y, no dysmorphic features                                                                                                                                                                                                | Father unaffected               |
| 137 | 14029_560  | M      | Sporadic        | Blood               | 2q34            | 214808080-214829997    | 21 918    | Gain | <i>SPAG16</i> exonic                                           | Paternal    | <i>SPAG16</i>           | qPCR   | (1 healthy brother, no DNA)                               | autism, normal IQ, language delay, neurodevelopmental delay, no epilepsy, no dysmorphic features; mother had 3 previous miscarriages; maternal great-aunt had autism                                                                                                                                                 | Father unaffected               |
| 138 | 14164_2680 | M      | Sporadic        | Blood               | 2q34            | 214808080-214829997    | 21 918    | Gain | <i>SPAG16</i> exonic                                           | Maternal    | <i>SPAG16</i>           | qPCR   | (1 brother language delay, no DNA)                        | Autism, normal IQ, phrase speech delay, no epilepsy, no dysmorphic features                                                                                                                                                                                                                                          | Mother unaffected               |
| 139 | 14200_3240 | M      | Sporadic        | Blood               | 2q34            | 214803990-214829997    | 26 008    | Gain | <i>SPAG16</i> exonic                                           | Paternal    | <i>SPAG16</i>           | qPCR   | (1 healthy brother, no DNA)                               | Autism, normal IQ, phrase speech delay, no epilepsy, no dysmorphic features                                                                                                                                                                                                                                          | Father unaffected               |
| 140 | 14061_1040 | M      | Sporadic        | Blood               | 5q23.1          | 118544777-118617384    | 72 608    | Gain | <i>DMXL1</i> exonic                                            | Maternal    | <i>DMXL1</i>            | qPCR   | (no sibs)                                                 | Autism, mild MR, phrase speech delay, no epilepsy, delivery complications, neurodevelopmental delay, no dysmorphic features                                                                                                                                                                                          | Mother unaffected               |
| 141 | 14072_1250 | M      | Sporadic        | Blood               | 6q24.3          | 145841703-145852542    | 10 840    | Loss | —                                                              | Paternal    | not in gene             | qPCR   | (1 healthy brother, no DNA)                               | Autism, normal IQ, no language delay, no epilepsy, sleep problems, no dysmorphic features                                                                                                                                                                                                                            | Father unaffected               |
| 142 | 14230_3640 | M      | Sporadic        | Blood               | 6q24.3          | 145841703-145857642    | 15 940    | Loss | —                                                              | Maternal    | not in gene             | qPCR   | (2 healthy half-sisters, no DNA)                          | ASD, mild MR, no epilepsy, no dysmorphic features                                                                                                                                                                                                                                                                    | Mother unaffected               |
| 143 | 14171_2770 | F      | Sporadic        | Blood               | 6q24.3          | 145841703-145852542    | 10 840    | Loss | —                                                              | Paternal    | not in gene             | qPCR   | (1 healthy sister, no DNA)                                | Autism, moderate MR, language delay, altered EEG, developmental delay, no dysmorphic features, hypotonia, myopia; brain MRI: cortico-subcortical atrophy                                                                                                                                                             | Father schizoaffective disorder |
| 144 | 14111_2000 | M      | Sporadic        | Blood               | 9q33.2          | 124209751-124398737    | 188 987   | Gain | <i>OR1L8,OR1N2,OR1N1,OR1J4,OR1J2,OR1J1</i>                     | Paternal    | <i>OR1J1</i>            | qPCR   | (1 healthy sister, no DNA)                                | Autism, normal IQ; mild asphyxia during delivery, did not require reanimation; no language delay, neurodevelopmental delay at 2 y, no epilepsy, no dysmorphic features                                                                                                                                               | Father unaffected               |
| 145 | 14184_3020 | M      | Sporadic        | Blood               | 9q33.2          | 124209751-124398737    | 188 987   | Gain | <i>OR1L8,OR1N2,OR1N1,OR1J4,OR1J2,OR1J1</i>                     | Maternal    | <i>OR1J1</i>            | qPCR   | (1 healthy brother, no DNA)                               | ASD, normal IQ, no language delay, no epilepsy, no dysmorphic features                                                                                                                                                                                                                                               | Mother unaffected               |
| 146 | 14167_2720 | M      | Sporadic        | Blood               | 15q13.2,15q13.3 | 28705540-30436163      | 1 730 623 | loss | <i>KLF13, OTUD7A, MTMR15, MTMR10, CHRNA7, ARHGAP11B, TRPM1</i> | Paternal    | not in gene             | qPCR   | (no sibs)                                                 | Autism, mild MR, phrase speech delay, no epilepsy, no dysmorphic features; <a href="#">15q13.3 microdeletion syndrome</a>                                                                                                                                                                                            | Father unaffected               |

| #   | AGP ID     | Gender | ASD family type | Tissue <sup>a</sup> | Cytoband | Start-End <sup>b</sup> | Size (bp) | CNV  | RefSeq Genes                                                                                                                 | Inheritance  | Assay location/<br>Gene         | Method                               | Segregation in sibs                           | Phenotype                                                                                                                                                                                                                                                   | Parental phenotype |
|-----|------------|--------|-----------------|---------------------|----------|------------------------|-----------|------|------------------------------------------------------------------------------------------------------------------------------|--------------|---------------------------------|--------------------------------------|-----------------------------------------------|-------------------------------------------------------------------------------------------------------------------------------------------------------------------------------------------------------------------------------------------------------------|--------------------|
| 147 | 14071_1240 | M      | Sporadic        | Blood               | 16p12.1  | 21788416-22351124      | 562 709   | Loss | <i>EEF2K</i> ,<br><i>C16orf65</i> ,<br><i>CDR2</i> , <i>POLR3E</i> ,<br><i>C16orf52</i> ,<br><i>UQCRC2</i> ,<br><i>VWA3A</i> | Paternal     | <i>POLR3E</i> ,<br><i>VWA3A</i> | qPCR                                 | (not tested)                                  | Autism, mild MR, phrase speech delay, neurodevelopmental delay with onset at 2 y, no dysmorphic features, no epilepsy, sleep problems; <a href="#">16p12.1 microdeletion</a>                                                                                | Father unaffected  |
| 148 | 14262_3850 | M      | Sporadic        | Blood               | 18q12.2  | 35205049-35299318      | 94 270    | Loss | <i>LOC647946</i><br>(non-coding RNA)                                                                                         | Paternal     | not in gene                     | qPCR                                 | (no sibs)                                     | ASD, normal IQ, no language delay, no epilepsy, neurodevelopmental delay at 2 y, no dysmorphic features                                                                                                                                                     | Father unaffected  |
| 149 | 14049_850  | M      | Sporadic        | Blood               | 18q12.2  | 35205049-35299318      | 94 270    | Loss | <i>LOC647946</i><br>(non-coding RNA)                                                                                         | Maternal     | not in gene                     | qPCR                                 | (1 healthy sister, 1 healthy brother, no DNA) | Autism, mild MR, phrase speech delay, no epilepsy, gastrointestinal problems, growth delay, neurodevelopmental delay at 2 y, no dysmorphic features                                                                                                         | Mother unaffected  |
| 150 | 14144_2420 | M      | Sporadic        | Blood               | Xq28     | 154569169-154582606    | 13 438    | Loss | —                                                                                                                            | Maternal     | not in gene                     | qPCR                                 | (1 healthy sister, no DNA)                    | Autism, normal IQ, no language delay, no epilepsy, neurodevelopmental delay at 2 y, no dysmorphic features                                                                                                                                                  | Mother unaffected  |
| 151 | 14186_3050 | M      | Sporadic        | Blood               | Xq28     | 1545691691-54582606    | 13 438    | Loss | —                                                                                                                            | Maternal     | not in gene                     | qPCR                                 | (1 healthy brother, no DNA)                   | Autism, normal IQ, no language delay, no epilepsy, neurodevelopment delay, no dysmorphic features                                                                                                                                                           | Mother unaffected  |
| 152 | 14198_3220 | M      | Familial        | Blood               | Xq28     | 154569169-154582606    | 13 438    | Loss | —                                                                                                                            | Maternal     | not in gene                     | qPCR                                 | (no sibs)                                     | ASD, normal IQ, phrase speech delay, no epilepsy, no dysmorphic features, myopia                                                                                                                                                                            | Mother depression  |
| 153 | 2232_1     | M      | Sporadic        | Blood               | 1p36.33  | 1370430-1429557        | 59 128    | Loss | <i>ATAD3B</i> whole,<br><i>ATAD3C</i> whole                                                                                  | Paternal     | close to<br><i>ATAD3B</i>       | qPCR                                 | (not tested)                                  | Autism, mild MR, language delay, overall nondysmorphic appearance, macrocephalic, wide nasal bridge, partial transverse palmar crease on left hand, leaky gut, numerous food allergies, wears glasses for mild hypermetropia, no epilepsy, normal brain MRI | NA                 |
| 154 | 2232_1     | M      | Sporadic        | Blood               | 3p11.1   | 89485137-89499861      | 14 724    | Loss | <i>EPHA3</i> intronic                                                                                                        | Both parents | <i>EPHA3</i>                    | qPCR,<br>Affymetrix 6.0<br>SNP array | (not tested)                                  | (see above)                                                                                                                                                                                                                                                 | NA                 |
| 155 | 2230_1     | M      | Sporadic        | Blood               | 1q24.2   | 167493526-167507362    | 13 837    | Loss | <i>NME7</i> intronic                                                                                                         | Maternal     | <i>NME7</i>                     | qPCR                                 | (not tested)                                  | Autism, moderate MR, language delay, no dysmorphic features, fifth finger clinodactyly, obesity, urethral obstruction surgically repaired, bilateral inguinal hernias, chronic ear infections, allergies, no epilepsy, normal brain CT scan                 | NA                 |
| 156 | 2230_1     | M      | Sporadic        | Blood               | 5q11.2   | 54842833-54966863      | 124 031   | Gain | <i>SLC38A9</i> exonic,<br><i>PPAP2A</i> exonic                                                                               | Paternal     | <i>SLC38A9</i>                  | qPCR, Affy 6.0                       | (not tested)                                  | (see above)                                                                                                                                                                                                                                                 | NA                 |
| 157 | 2230_1     | M      | Sporadic        | Blood               | 14q31.1  | 78557401-78589854      | 32 454    | Loss | <i>NRXN3</i> intronic                                                                                                        | Paternal     | <i>NRXN3</i>                    | qPCR, Affy 6.0                       | (not tested)                                  | (see above)                                                                                                                                                                                                                                                 | NA                 |
| 158 | 2230_1     | M      | Sporadic        | Blood               | 22q11.1  | 15641026-15653178      | 12 153    | Loss | <i>XKR3</i> exonic                                                                                                           | Paternal     | <i>XKR3</i>                     | qPCR, Affy 6.0                       | (not tested)                                  | (see above)                                                                                                                                                                                                                                                 | NA                 |
| 159 | 2241_1     | M      | Sporadic        | Blood               | 5p14.2   | 24545450-24623946      | 78 497    | Loss | <i>CDH10</i> exonic                                                                                                          | Maternal     | <i>CDH10</i>                    | qPCR                                 | (not tested)                                  | Autism, mild MR, no language delay, no dysmorphic features, growth delay, recurrent ear infections, hay fever, no epilepsy, normal brain CT scan                                                                                                            | NA                 |
| 160 | 2234_1     | M      | Sporadic        | Blood               | 8p23.2   | 3773951-3780096        | 6 146     | Loss | <i>CSMD1</i> intronic                                                                                                        | Maternal     | <i>CSMD1</i>                    | qPCR                                 | (not tested)                                  | Autism, language delay, no dysmorphic features, significant hypotonia but walked at 18 m, normal neurological exam, no epilepsy                                                                                                                             | NA                 |
| 161 | 2234_1     | M      | Sporadic        | Blood               | 9p24.3   | 175632-422918          | 247 286   | Gain | <i>DOCK8</i> exonic,<br><i>C9orf66</i> whole                                                                                 | Maternal     | <i>DOCK8</i>                    | qPCR, Affy 6.0                       | (not tested)                                  | (see above)                                                                                                                                                                                                                                                 | NA                 |
| 162 | 2234_1     | M      | Sporadic        | Blood               | 12q12    | 38587878-38603284      | 15 407    | Loss | <i>SLC2A13</i><br>intronic                                                                                                   | Maternal     | <i>SLC2A13</i>                  | qPCR, Affy 6.0                       | (not tested)                                  | (see above)                                                                                                                                                                                                                                                 | NA                 |

| #   | AGP ID   | Gender | ASD family type | Tissue <sup>a</sup> | Cytoband | Start-End <sup>b</sup> | Size (bp) | CNV  | RefSeq Genes                                                                                                                                                             | Inheritance | Assay location/ Gene | Method                                                             | Segregation in sibs | Phenotype                                                                                                                                                                                                                                                               | Parental phenotype |
|-----|----------|--------|-----------------|---------------------|----------|------------------------|-----------|------|--------------------------------------------------------------------------------------------------------------------------------------------------------------------------|-------------|----------------------|--------------------------------------------------------------------|---------------------|-------------------------------------------------------------------------------------------------------------------------------------------------------------------------------------------------------------------------------------------------------------------------|--------------------|
| 163 | 2236_1   | M      | Sporadic        | Blood               | 8q13.3   | 72378104-72380244      | 2 141     | Loss | <i>EYA1</i> intronic                                                                                                                                                     | Maternal    | <i>EYA1</i>          | qPCR                                                               | (not tested)        | Autism, normal IQ, language delay, no dysmorphic features, mild ligamentous laxity, 4th toe clinodactyly, Mongolian spot around sacral area, slightly hypotonic, normal neurological exam, no epilepsy, recurrent ear infections, reactive airways disease when younger | NA                 |
| 164 | 2236_1   | M      | Sporadic        | Blood               | 15q14    | 32459510-32606592      | 147 083   | Loss | <i>GOLGA8A</i> exonic,                                                                                                                                                   | Maternal    | <i>GOLGA8</i>        | qPCR, Affy 6.0                                                     | (not tested)        | (see above)                                                                                                                                                                                                                                                             | NA                 |
| 165 | 2238_1   | M      | Sporadic        | Blood               | 9p24.3   | 600460-694075          | 93 615    | Loss | <i>KANK1</i> exonic                                                                                                                                                      | Paternal    | <i>KANK1</i>         | qPCR, Affy 6.0                                                     | (not tested)        | Autism, MR, language delay, limited language, no dysmorphic features, constipation, hay fever, no epilepsy                                                                                                                                                              | NA                 |
| 166 | 1957_303 | F      | Familial        | CL                  | 9p24.3   | 243594-362341          | 118 748   | Gain | <i>DOCK8</i> exonic                                                                                                                                                      | Maternal    | SNP array            | Illumina 550K (Glessner et al. 2009)                               | (not tested)        | Autism by ADI-R and ADOS, normal IQ, verbal (AGRE ID: AU1453303)                                                                                                                                                                                                        | NA                 |
| 167 | 1987_301 | F      | Familial        | CL                  | 15q11.2  | 20090262-21038099      | 947 838   | Gain | <i>CYFIP1</i> ,<br><i>GOLGA8E</i> ,<br><i>GOLGA9P</i> ,<br><i>HERC2P2</i> ,<br><i>LOC283767</i> ,<br><i>NIPA1</i> , <i>NIPA2</i> ,<br><i>TUBGCP5</i> ,<br><i>WHDC1L1</i> | Maternal    | SNP array            | Illumina 550K (Glessner et al. 2009)                               | (not tested)        | Autism by ADI-R and ADOS, normal IQ, verbal, no epilepsy; <a href="#">15q11.2 BP1-BP2 microduplication</a> (AGRE ID: AU1871301)                                                                                                                                         | NA                 |
| 168 | 1950_301 | M      | Familial        | CL                  | 15q13    | 26762141-30436163      | 3 674 020 | Loss | 14 genes                                                                                                                                                                 | Maternal    | SNP array            | Illumina 550K (Glessner et al. 2009)                               | (not tested)        | Autism by ADI-R and ASD by ADOS, no IQ available (untestable by Raven), non verbal, poor suck at birth, no epilepsy; <a href="#">15q13.3 microdeletion syndrome</a> (AGRE ID: AU1024301)                                                                                | NA                 |
| 169 | 1231_3   | M      | Familial        | CL                  | 15q13.2  | 28187888-28881771      | 693 884   | Loss | <i>ARHGAP11B</i> ,<br><i>CHRFAM7A</i> ,<br><i>DKFZP434L187</i>                                                                                                           | Paternal    | SNP array            | Illumina 550K (Glessner et al. 2009)                               | (not tested)        | Autism by ADI-R and ADOS, normal IQ, verbal, delayed suture closure, complex partial seizures ( <a href="#">CNV partially overlaps the 15q13.3 microdeletion syndrome region</a> ) (AGRE ID: AU062603)                                                                  | NA                 |
| 170 | 1956_302 | M      | Familial        | CL                  | 15q22.31 | 63073899-63183826      | 109 928   | Gain | <i>MTFMT</i> ,<br><i>OSTbeta</i> ,<br><i>RASL12</i> ,<br><i>hCG_1645727</i>                                                                                              | Paternal    | SNP array            | Illumina 550K (Glessner et al. 2009)                               | (not tested)        | Autism by ADI-R and ASD by ADOS, MR (untestable by Ravens, low functioning), non verbal (AGRE ID: AU1377302)                                                                                                                                                            | NA                 |
| 171 | 1165_3   | M      | Familial        | CL                  | 17q24.2  | 69345596-70202513      | 856 918   | Gain | 15 genes                                                                                                                                                                 | Paternal    | SNP array            | Illumina 550K (Glessner et al. 2009), Affy 5.0 (Bucan et al. 2009) | (not tested)        | Autism by ADI-R and ADOS, MR, non verbal, poor suck at birth, floppy infant, gastrointestinal problems (AGRE ID: AU043903)                                                                                                                                              | NA                 |

<sup>a</sup> DNA source: CL, cell line (peripheral blood lymphoblastoid cell line); BBC, buccal swab; U, unknown (most were either blood or buccal swab).

<sup>b</sup> Human reference genome NCBI v36, hg18.

Abbreviations: ADI-R, Autism Diagnostic Interview-Revised; ADOS, Autism Diagnostic Observation Schedule; ASD, autism spectrum disorder; CARS, Childhood Autism Rating Scale; dx, diagnosis; DZ, dizygotic; hx, history; IQ, intellectual quotient; LR-PCR, long range PCR; MLPA, multiplex ligation probe amplification; MR, mental retardation; MZ, monozygotic; NA, not available; OCD, obsessive-compulsive disorder; PDD-NOS, pervasive developmental disorder-not otherwise specified; SLI, specific language impairment

**Supplementary Table 8. Rare CNVs in 996 ASD cases**

Data provided separately, as an Excel workbook file.

Supplementary Table 9. List of known ASD genes, ID genes, and ASD-candidates

| Gene symbol or Locus                | Cytoband       | Type  | Associated condition                                                                                                                |
|-------------------------------------|----------------|-------|-------------------------------------------------------------------------------------------------------------------------------------|
| <b>ASD Implicated</b>               |                |       |                                                                                                                                     |
| <i>NRXN1</i>                        | 2p16.3         | gene  | disrupted in ASD, MR, schizophrenia                                                                                                 |
| <i>SLC9A9</i>                       | 3q24           | gene  | rare homozygous deletions, sequence mutations                                                                                       |
| <i>c3orf58</i>                      | 3q24           | gene  | <i>DIA1</i> (Deleted in Autism), rare homozygous deletions                                                                          |
| <i>NIPBL</i>                        | 5p13.2         | gene  | Cornelia de Lange syndrome                                                                                                          |
| <i>NSD1</i>                         | 5q35.3         | gene  | Sotos syndrome                                                                                                                      |
| <i>AHI1</i>                         | 6q23.3         | gene  | Joubert syndrome (autosomal recessive)                                                                                              |
| <i>CNTNAP2</i>                      | 7q36.1         | gene  | Cortical dysplasia-focal epilepsy syndrome                                                                                          |
| <i>CHD7</i>                         | 8q12.2         | gene  | CHARGE syndrome                                                                                                                     |
| <i>VPS13B</i>                       | 8q22.2         | gene  | Cohen syndrome (autosomal recessive)                                                                                                |
| <i>TSC1</i>                         | 9q34           | gene  | Tuberous sclerosis                                                                                                                  |
| <i>PTEN</i>                         | 10q23.3        | gene  | PTEN hamartoma tumor syndrome                                                                                                       |
| <i>DHCR7</i>                        | 11q13.2-q13.5  | gene  | Smith-Lemli-Optiz syndrome                                                                                                          |
| <i>CACNA1C</i>                      | 12p13.3        | gene  | Timothy syndrome                                                                                                                    |
| <i>PTPN11</i>                       | 12q24          | gene  | Noonan syndrome                                                                                                                     |
| <i>UBE3A</i>                        | 15q11-q13      | gene  | Angelman syndrome (gene within locus)                                                                                               |
| <i>TSC2</i>                         | 16p13.3        | gene  | Tuberous sclerosis                                                                                                                  |
| <i>CREBBP</i>                       | 16p13.3        | gene  | Rubinstein-Taybi syndrome                                                                                                           |
| <i>RAI1</i>                         | 17p11.2        | gene  | Smith-Magenis syndrome (deletion), Potocki-Lupski syndrome (duplication) (gene within locus)                                        |
| <i>NF1</i>                          | 17q11.2        | gene  | neurofibromatosis type 1, NF1 microdeletion/microduplication syndrome                                                               |
| <i>DMPK</i>                         | 19q13.3        | gene  | Myotonic dystrophy type 1                                                                                                           |
| <i>TBX1</i>                         | 22q11.21       | gene  | 22q11 deletion syndrome (velocardiofacial/DiGeorge syndrome) (gene within locus)                                                    |
| <i>ADSL</i>                         | 22q13.1        | gene  | Adenylosuccinate lyase deficiency (autosomal recessive)                                                                             |
| <i>SHANK3</i>                       | 22q13.3        | gene  | 22q13 deletion syndrome                                                                                                             |
| <i>NLGN4X</i>                       | Xp22.32-p22.31 | gene  | ASD, nonsyndromic XLMR                                                                                                              |
| <i>CDKL5</i>                        | Xp22           | gene  | Rett like syndrome with infantile spasms                                                                                            |
| <i>ARX</i>                          | Xp21           | gene  | large spectrum of MR phenotypes: X-linked lissencephaly and abnormal genitalia, West syndrome, Partington syndrome, nonsyndromic MR |
| <i>IL1RAPL1</i>                     | Xp22.1-p21.3   | gene  | ASD, nonsyndromic XLMR                                                                                                              |
| <i>DMD</i>                          | Xp21.2         | gene  | Muscular dystrophy, Duchenne and Becker types                                                                                       |
| <i>FGD1</i>                         | Xp11.21        | gene  | Aarskog-Scott syndrome, nonsyndromic XLMR                                                                                           |
| <i>NLGN3</i>                        | Xq13.1         | gene  | ASD, nonsyndromic XLMR                                                                                                              |
| <i>ATRX</i>                         | Xq21.1         | gene  | large spectrum of phenotypes, including ATRX syndrome and nonsyndromic XLMR                                                         |
| <i>FMR1</i>                         | Xq27.3         | gene  | Fragile X mental retardation 1, ASD                                                                                                 |
| <i>AFF2</i>                         | Xq28           | gene  | nonsyndromic XLMR                                                                                                                   |
| <i>SLC6A8</i>                       | Xq28           | gene  | Creatine deficiency syndrome, nonsyndromic XLMR                                                                                     |
| <i>MECP2</i>                        | Xq28           | gene  | Rett syndrome, syndromic and nonsyndromic XLMR, neonatal encephalopathy (in males)                                                  |
| <i>RPL10</i>                        | Xq28           | gene  | mutated in two ASD families, non syndromic XLMR                                                                                     |
| 1p36_del                            | 1p36           | locus | 1p36 microdeletion syndrome (chr1:1-5308621)                                                                                        |
| 1q21_del_dup                        | 1q21.1         | locus | 1q21.1 recurrent microdeletion/microduplication (chr1:144979000-146204000)                                                          |
| 2q37_del                            | 2q37           | locus | 2q37 monosomy (chr2:239619630-242951149)                                                                                            |
| 4p16_WH_syndr                       | 4p16           | locus | Wolf-Hirschhorn syndrome (chr4:1-2043468)                                                                                           |
| 7q11_del_dup                        | 7q11.23        | locus | Williams-Beuren syndrome (deletion), 7q11.23 duplication syndrome (chr7:71970679-74254837)                                          |
| 15q11-13_del_dup                    | 15q11.2-q13.1  | locus | Angelman syndrome (maternal deletion), Prader-Willi syndrome (paternal deletion), 15q11-q13 duplication (chr15:21309483-26230781)   |
| 15q13_del                           | 15q13.3        | locus | 15q13.3 microdeletion syndrome (chr15:28557287-30488774)                                                                            |
| 15q24_del                           | 15q24          | locus | 15q24 recurrent microdeletion syndrome (chr15:72164227-73949332)                                                                    |
| 16p11_del_dup                       | 16p11.2        | locus | 16p11.2 autism susceptibility locus (chr16:29550000-30200000)                                                                       |
| 22q11_del_dup                       | 22q11.21       | locus | 22q11 deletion syndrome (velocardiofacial/DiGeorge syndrome), 22q11 duplication syndrome (chr22:16926349-20666469)                  |
| <b>Intellectual disability (ID)</b> |                |       |                                                                                                                                     |
| <i>POMGNT1</i>                      | 1p34.1         | gene  | Muscle-eye-brain disease (autosomal recessive)                                                                                      |
| <i>ASPM</i>                         | 1q31           | gene  | Microcephaly and MR (autosomal recessive)                                                                                           |
| <i>NPHP1</i>                        | 2q13           | gene  | Joubert syndrome (autosomal recessive)                                                                                              |
| <i>MBD5</i>                         | 2q23.1         | gene  | autosomal dominant MR                                                                                                               |
| <i>CRBN</i>                         | 3p26.3         | gene  | autosomal recessive nonsyndromic MR                                                                                                 |
| <i>ARL13B</i>                       | 3q11.2         | gene  | Joubert syndrome (autosomal recessive)                                                                                              |
| <i>CC2D2A</i>                       | 4p15.33        | gene  | Joubert syndrome, Meckel syndrome, COACH syndrome (autosomal recessive)                                                             |
| <i>PRSS12</i>                       | 4q26           | gene  | autosomal recessive nonsyndromic MR                                                                                                 |
| <i>SYNGAP1</i>                      | 6p21.32        | gene  | nonsyndromic MR                                                                                                                     |

| Gene symbol or Locus | Cytoband | Type | Associated condition                                                                                                      |
|----------------------|----------|------|---------------------------------------------------------------------------------------------------------------------------|
| <i>GRIK2</i>         | 6q16.3   | gene | autosomal recessive nonsyndromic MR (gene also in ASD candidate list)                                                     |
| <i>HOXA1</i>         | 7p15.3   | gene | Bosley-Salih-Alorainy/Athabaskan brainstem dysgenesis syndromes, autosomal recessive MR (gene also in ASD candidate list) |
| <i>AP4M1</i>         | 7q22.1   | gene | autosomal recessive type of tetraplegic cerebral palsy with MR                                                            |
| <i>RELN</i>          | 7q22     | gene | Lissencephaly                                                                                                             |
| <i>MCPH1</i>         | 8p23.1   | gene | Microcephaly and MR (autosomal recessive)                                                                                 |
| <i>TUSC3</i>         | 8p22     | gene | nonsyndromic autosomal recessive MR                                                                                       |
| <i>TMEM67</i>        | 8q22.1   | gene | Joubert syndrome (autosomal recessive)                                                                                    |
| <i>VLDLR</i>         | 9p24     | gene | Cerebellar hypoplasia and MR (autosomal recessive)                                                                        |
| <i>FKTN</i>          | 9q31.2   | gene | Fukuyama congenital muscular dystrophy with type 2 lissencephaly (autosomal recessive)                                    |
| <i>CDK5RAP2</i>      | 9q33.2   | gene | Microcephaly vera (autosomal recessive)                                                                                   |
| <i>STXBP1</i>        | 9q34.11  | gene | autosomal dominant MR and nonsyndromic epilepsy                                                                           |
| <i>POMT1</i>         | 9q34.13  | gene | Walker-Warburg syndrome (autosomal recessive)                                                                             |
| <i>EHMT1</i>         | 9q34.3   | gene | 9q subtelomeric deletion syndrome (gene within locus)                                                                     |
| <i>SMC3</i>          | 10q25.2  | gene | Cornelia de Lange syndrome                                                                                                |
| <i>ALG8</i>          | 11q14.1  | gene | Congenital disorder of glycosylation type 1h (autosomal recessive)                                                        |
| <i>CEP290</i>        | 12q21.32 | gene | Joubert syndrome (autosomal recessive)                                                                                    |
| <i>CENPJ</i>         | 13q12.12 | gene | Microcephaly vera (autosomal recessive)                                                                                   |
| <i>FOXP1</i>         | 14q12    | gene | Congenital variant of Rett syndrome                                                                                       |
| <i>POMT2</i>         | 14q24.3  | gene | Walker-Warburg syndrome (autosomal recessive)                                                                             |
| <i>RPGRIP1L</i>      | 16q12.2  | gene | Joubert syndrome (autosomal recessive)                                                                                    |
| <i>PAFAH1B1</i>      | 17p13.3  | gene | Miller-Dieker lissencephaly syndrome (gene within locus)                                                                  |
| <i>YWHAE</i>         | 17p13.3  | gene | Miller-Dieker lissencephaly syndrome (gene within locus)                                                                  |
| <i>CC2D1A</i>        | 19p13.12 | gene | nonsyndromic autosomal recessive MR                                                                                       |
| <i>DNMT3B</i>        | 20q11.2  | gene | Immunodeficiency, centromeric instability, and facial dysmorphism (ICF) syndrome (autosomal)                              |
| <i>EP300</i>         | 22q13.2  | gene | Rubinstein-Taybi syndrome                                                                                                 |
| <i>MID1</i>          | Xp22     | gene | Opitz syndrome                                                                                                            |
| <i>HCCS</i>          | Xp22.2   | gene | Microphthalmia with linear skin defects syndrome (MCOP57)                                                                 |
| <i>OFD1</i>          | Xp22.2   | gene | Oral facial digital syndrome type 1, Simpson-Golabi-Behmel syndrome type 2                                                |
| <i>FANCB</i>         | Xp22.2   | gene | Fanconi anemia complementation group B                                                                                    |
| <i>AP1S2</i>         | Xp22.2   | gene | nonsyndromic XLMR                                                                                                         |
| <i>NHS</i>           | Xp22.13  | gene | Nance-Horan syndrome                                                                                                      |
| <i>PDHA1</i>         | Xp22.12  | gene | Pyruvate decarboxylase deficiency                                                                                         |
| <i>RPS6KA3</i>       | Xp22.12  | gene | Coffin-Lowry syndrome, nonsyndromic MR                                                                                    |
| <i>SMS</i>           | Xp22.1   | gene | Snyder-Robinson syndrome                                                                                                  |
| <i>GK</i>            | Xp21.2   | gene | Glycerol kinase deficiency, MR with hyperglycerolemia                                                                     |
| <i>OTC</i>           | Xp21.1   | gene | Ornithine carbamoyltransferase deficiency                                                                                 |
| <i>TSPAN7</i>        | Xp11.4   | gene | nonsyndromic XLMR                                                                                                         |
| <i>BCOR</i>          | Xp11.4   | gene | Lenz microphthalmia 2, oculo-faciocardiodental syndrome                                                                   |
| <i>ATP6AP2</i>       | Xp11.4   | gene | X-linked mental retardation with epilepsy                                                                                 |
| <i>CASK</i>          | Xp11.4   | gene | XLMR and microcephaly with pontine and cerebellar hypoplasia, XLMR with nystagmus                                         |
| <i>MAOA</i>          | Xp11.3   | gene | Brunner syndrome                                                                                                          |
| <i>NDP</i>           | Xp11.4   | gene | Norrie disease                                                                                                            |
| <i>ZNF674</i>        | Xp11.3   | gene | nonsyndromic XLMR                                                                                                         |
| <i>ZNF41</i>         | Xp11.23  | gene | nonsyndromic XLMR                                                                                                         |
| <i>SYN1</i>          | Xp11.23  | gene | Epilepsy, X-linked, with variable learning disabilities and behavior disorders                                            |
| <i>ZNF81</i>         | Xp11.23  | gene | nonsyndromic XLMR                                                                                                         |
| <i>FTSJ1</i>         | Xp11.23  | gene | nonsyndromic XLMR                                                                                                         |
| <i>PORCN</i>         | Xp11.23  | gene | Focal dermal hypoplasia                                                                                                   |
| <i>PQBP1</i>         | Xp11.23  | gene | large spectrum of MR phenotypes, including nonsyndromic MR                                                                |
| <i>SYP</i>           | Xp11.23  | gene | nonsyndromic XLMR                                                                                                         |
| <i>SHROOM4</i>       | Xp11.22  | gene | Stocco dos Santos X-linked mental retardation syndrome, nonsyndromic XLMR                                                 |
| <i>JARID1C</i>       | Xp11.22  | gene | Mental retardation, X-linked, JARID1C-related; syndromic and nonsyndromic MR                                              |
| <i>SMC1A</i>         | Xp11.22  | gene | Cornelia de Lange syndrome                                                                                                |
| <i>HSD17B10</i>      | Xp11.22  | gene | 2-methyl-3-hydroxybutyryl-CoA dehydrogenase (MHBD) deficiency                                                             |
| <i>HUWE1</i>         | Xp11.22  | gene | nonsyndromic XLMR                                                                                                         |
| <i>PHF8</i>          | Xp11.22  | gene | Siderius-Hamel syndrome                                                                                                   |
| <i>KLF8</i>          | Xp11.21  | gene | nonsyndromic XLMR                                                                                                         |
| <i>ARHGEF9</i>       | Xq11.1   | gene | Hyperekplexia and epilepsy                                                                                                |
| <i>OPHN1</i>         | Xq12     | gene | MR with cerebellar and vermis hypoplasia                                                                                  |
| <i>DLG3</i>          | Xq13.1   | gene | nonsyndromic XLMR                                                                                                         |
| <i>MED12</i>         | Xq13.1   | gene | Opitz-Kaveggia syndrome (FG syndrome-1)                                                                                   |
| <i>ZMYM3</i>         | Xq13.1   | gene | syndromic XLMR                                                                                                            |
| <i>SLC16A2</i>       | Xq13.2   | gene | Allan-Herndon-Dudley syndrome                                                                                             |
| <i>KIAA2022</i>      | Xq13.3   | gene | syndromic XLMR                                                                                                            |
| <i>MAGT1</i>         | Xq21.1   | gene | nonsyndromic XLMR                                                                                                         |
| <i>ATP7A</i>         | Xq21.1   | gene | Menkes disease, occipital horn syndrome, X-linked cutis laxa                                                              |
| <i>PGK1</i>          | Xq13     | gene | Phosphoglycerate kinase 1 deficiency                                                                                      |

| Gene symbol or Locus       | Cytoband      | Type  | Associated condition                                                                   |
|----------------------------|---------------|-------|----------------------------------------------------------------------------------------|
| <i>BRWD3</i>               | Xq21.1        | gene  | nonsyndromic XLMR                                                                      |
| <i>ZNF711</i>              | Xq21.1        | gene  | nonsyndromic XLMR                                                                      |
| <i>PCDH19</i>              | Xq22.1        | gene  | Female-restricted epilepsy and mental retardation syndrome                             |
| <i>SRPX2</i>               | Xq22.1        | gene  | Rolandic epilepsy with speech dyspraxia                                                |
| <i>TIMM8A</i>              | Xq22.1        | gene  | Mohr-Tranebjaerg syndrome, Jensen syndrome                                             |
| <i>NXF5</i>                | Xq22.1        | gene  | syndromic XLMR                                                                         |
| <i>PLP1</i>                | Xq22.2        | gene  | Pelizaeus-Merzbacher disease                                                           |
| <i>PRPS1</i>               | Xq22.3        | gene  | Phosphoribosylpyrophosphate synthetase I superactivity                                 |
| <i>ACSL4</i>               | Xq22.3        | gene  | nonsyndromic XLMR                                                                      |
| <i>PAK3</i>                | Xq22.3        | gene  | nonsyndromic XLMR                                                                      |
| <i>DCX</i>                 | Xq22.3        | gene  | Type 1 lissencephaly                                                                   |
| <i>AGTR2</i>               | Xq23          | gene  | nonsyndromic XLMR                                                                      |
| <i>UBE2A</i>               | Xq24          | gene  | syndromic XLMR <i>UBE2A</i> -related                                                   |
| <i>UPF3B</i>               | Xq24          | gene  | nonsyndromic XLMR                                                                      |
| <i>NDUFA1</i>              | Xq24          | gene  | Mitochondrial complex I deficiency                                                     |
| <i>LAMP2</i>               | Xq24          | gene  | Danon disease                                                                          |
| <i>CUL4B</i>               | Xq24          | gene  | nonsyndromic XLMR                                                                      |
| <i>GRIA3</i>               | Xq25          | gene  | nonsyndromic XLMR                                                                      |
| <i>OCRL</i>                | Xq25          | gene  | Lowe syndrome                                                                          |
| <i>ZDHHHC9</i>             | Xq26.1        | gene  | nonsyndromic XLMR                                                                      |
| <i>GPC3</i>                | Xq26.1        | gene  | Simpson-Golabi-Behmel syndrome type 1                                                  |
| <i>PHF6</i>                | Xq26.2        | gene  | Borjeson-Forssman-Lehmann syndrome                                                     |
| <i>HPRT1</i>               | Xq26.2        | gene  | Lesch-Nyhan syndrome                                                                   |
| <i>SLC9A6</i>              | Xq26.3        | gene  | syndromic XLMR, Christianson syndrome                                                  |
| <i>ARHGEF6</i>             | Xq26.3        | gene  | nonsyndromic XLMR                                                                      |
| <i>SOX3</i>                | Xq27.1        | gene  | XLMR with isolated growth hormone deficiency, X-linked panhypopituitarism              |
| <i>IDS</i>                 | Xq28          | gene  | Mucopolysaccharidosis II                                                               |
| <i>ABCD1</i>               | Xq28          | gene  | Adrenoleukodystrophy                                                                   |
| <i>L1CAM</i>               | Xq28          | gene  | X-linked hydrocephalus, MASA syndrome                                                  |
| <i>AVPR2</i>               | Xq28          | gene  | X-linked nephrogenic diabetes insipidus                                                |
| <i>FLNA</i>                | Xq28          | gene  | Bilateral periventricular nodular heterotopia                                          |
| <i>GDI1</i>                | Xq28          | gene  | nonsyndromic XLMR                                                                      |
| <i>IKBKG</i>               | Xq28          | gene  | Incontinentia pigmenti                                                                 |
| <i>DKC1</i>                | Xq28          | gene  | Dyskeratosis congenita                                                                 |
| 2p15-p16_del               | 2p15-16.1     | locus | 2p15-16.1 microdeletion syndrome (chr2:57595300-61591838)                              |
| 2q33_del                   | 2q33.1        | locus | 2q33.1 deletion syndrome (chr2:196633334-204915185)                                    |
| 3q29_del_dup               | 3q29          | locus | 3q29 microdeletion syndrome, 3q29 microduplication syndrome (chr3:197156626-198982266) |
| 5p_del_Cri-du-Chat-syindr  | 5p15          | locus | Cri du Chat syndrome (5p deletion) (chr5:1-11776854)                                   |
| 8p23_del                   | 8p23.1        | locus | 8p23.1 deletion syndrome (chr8:8156705-11803128)                                       |
| 9q_subtel_del              | 9q34.3        | locus | 9q subtelomeric deletion syndrome (chr9:139523184-140273252)                           |
| 11p13_WAGR_del             | 11p13         | locus | WAGR 11p13 deletion syndrome (chr11:31760085-32467564)                                 |
| Potocki-Shaffer_syindr     | 11p11.2       | locus | Potocki-Shaffer syndrome (chr11:43941853-46021136)                                     |
| 12q14_del                  | 12q14         | locus | 12q14 microdeletion syndrome (chr12:63358186-66931792)                                 |
| 15q26_overgrowth_syindr    | 15q26.3       | locus | 15q26 overgrowth syndrome ( <i>IGF1R</i> gene) (chr15:97175493-100338915)              |
| ATR-16_syindr              | 16p13.3       | locus | ATR-16 syndrome (alpha thalassemia/mental retardation syndrome) (chr16:1-774373)       |
| 16p13_del_dup              | 16p13.11      | locus | 16p13.11 recurrent microdeletion/microduplication (chr16:15411955-16191749)            |
| 16p11.2-p12.2_del          | 16p11.2-p12.2 | locus | 16p11.2-p12.2 microdeletion syndrome (chr16:21521457-28949693)                         |
| 17p13_MD_lissen_syindr_del | 17p13.3       | locus | 17p13.3 Miller-Dieker lissencephaly syndrome (chr17:1-2492179)                         |
| 17q21_del                  | 17q21.31      | locus | 17q21.31 microdeletion syndrome (chr17:40988249-41565982)                              |
| Cat-Eye_syindr             | 22q11.1       | locus | Cat eye syndrome (type I) (chr22:1-16971860)                                           |
| 22q11_distal_del           | 22q11.2       | locus | 22q11.2 distal deletion syndrome (chr22:20445848-22026229)                             |

## ASD candidates

|                |              |      |                                    |
|----------------|--------------|------|------------------------------------|
| <i>B3GALT6</i> | 1p36.33      | gene | <i>de novo</i> deletion            |
| <i>CA6</i>     | 1p36.2       | gene | rare CNV                           |
| <i>MTF1</i>    | 1p34.3       | gene | association                        |
| <i>RIMS3</i>   | 1p34.2       | gene | <i>de novo</i> deletion            |
| <i>NEGR1</i>   | 1p31.1       | gene | translocation breakpoint           |
| <i>DPYD</i>    | 1p21.3       | gene | <i>de novo</i> deletion            |
| <i>GPR89A</i>  | 1q21.1       | gene | rare CNV                           |
| <i>RFWD2</i>   | 1q25.1-q25.2 | gene | rare CNV                           |
| <i>PAPPA2</i>  | 1q25.2       | gene | rare CNV                           |
| <i>ASTN1</i>   | 1q25.2       | gene | paralogue of <i>ASTN2</i>          |
| <i>DISC1</i>   | 1q42.1       | gene | association                        |
| <i>DPP10</i>   | 2q14.1       | gene | rare CNV, paralogue of <i>DPP6</i> |
| <i>GALNT13</i> | 2q24.1       | gene | rare CNV                           |
| <i>SLC4A10</i> | 2q24.2       | gene | <i>de novo</i> deletion            |
| <i>SCN7A</i>   | 2q24.3       | gene | rare CNV                           |

| Gene symbol or Locus | Cytoband      | Type | Associated condition                              |
|----------------------|---------------|------|---------------------------------------------------|
| <i>SLC25A12</i>      | 2q31.1        | gene | association, linkage                              |
| <i>ITGA4</i>         | 2q31.3        | gene | association, translocation breakpoint             |
| <i>INPP1</i>         | 2q32.2        | gene | association                                       |
| <i>AGAP1</i>         | 2q37.2        | gene | association, linkage, rare CNV                    |
| <i>CNTN4</i>         | 3p26.3        | gene | rare CNV                                          |
| <i>OXTR</i>          | 3p25.3        | gene | association                                       |
| <i>FHIT</i>          | 3p14.2        | gene | <i>de novo</i> deletion                           |
| <i>SUCLG2</i>        | 3p14.1        | gene | rare CNV                                          |
| <i>CNTN3</i>         | 3p12.3        | gene | rare CNV                                          |
| <i>FBXO40</i>        | 3q13.33       | gene | rare CNV                                          |
| <i>NLGN1</i>         | 3q26.31       | gene | rare CNV                                          |
| <i>HTR3C</i>         | 3q27.1        | gene | association                                       |
| <i>GABRG1</i>        | 4p12          | gene | inversion breakpoint, chromosomal duplication     |
| <i>GABRA4</i>        | 4p12          | gene | association                                       |
| <i>GABRB1</i>        | 4p12          | gene | association                                       |
| <i>EIF4E</i>         | 4q23          | gene | translocation breakpoint                          |
| <i>PCDH10</i>        | 4q28.3        | gene | rare CNV                                          |
| <i>TDO2</i>          | 4q32.1        | gene | association                                       |
| <i>TPPP</i>          | 5p15.3        | gene | rare CNV                                          |
| <i>SEMA5A</i>        | 5p15.2        | gene | association                                       |
| <i>CTNND2</i>        | 5p15.2        | gene | rare CNV                                          |
| <i>CDH18</i>         | 5p14.3        | gene | translocation breakpoint                          |
| <i>CDH10</i>         | 5p14.2        | gene | association                                       |
| <i>CDH9</i>          | 5p14.1        | gene | association                                       |
| <i>KLHL3</i>         | 5q31.2        | gene | translocation breakpoint                          |
| <i>RNF182</i>        | 6p23          | gene | <i>de novo</i> deletion                           |
| <i>CD83</i>          | 6p23          | gene | <i>de novo</i> deletion                           |
| <i>CAP2</i>          | 6p22.3        | gene | <i>de novo</i> gain                               |
| <i>RNF8</i>          | 6p21.3        | gene | rare CNV                                          |
| <i>KIAA1586</i>      | 6p12.1        | gene | rare CNV                                          |
| <i>GRIK2</i>         | 6q16.3        | gene | association, linkage (gene also in ID list)       |
| <i>PLN</i>           | 6q22.31       | gene | rare CNV                                          |
| <i>PARK2</i>         | 6q26          | gene | rare CNV                                          |
| <i>TMEM195</i>       | 7p21.1        | gene | <i>de novo</i> deletion                           |
| <i>HOXA1</i>         | 7p15.3        | gene | <i>de novo</i> deletion (gene also in ID list)    |
| <i>AUTS2</i>         | 7q11.22       | gene | rare CNV                                          |
| <i>SRPK2</i>         | 7q22.2        | gene | inversion breakpoint                              |
| <i>PIK3CG</i>        | 7q22.3        | gene | association                                       |
| <i>LAMB1</i>         | 7q31.1        | gene | association                                       |
| <i>NRCAM</i>         | 7q31.1        | gene | association                                       |
| <i>MET</i>           | 7q31.2        | gene | association                                       |
| <i>ST7</i>           | 7q31.2        | gene | translocation breakpoint                          |
| <i>WNT2</i>          | 7q31.2        | gene | association                                       |
| <i>CADPS2</i>        | 7q31.3        | gene | rare CNV, association                             |
| <i>GRM8</i>          | 7q31.33       | gene | rare CNV                                          |
| <i>UBE2H</i>         | 7q32.2        | gene | association, paralogue of <i>UBE3A</i>            |
| <i>PRKAG2</i>        | 7q36.1        | gene | rare CNV                                          |
| <i>DPP6</i>          | 7q36.2        | gene | rare CNV                                          |
| <i>EN2</i>           | 7q36.3        | gene | association                                       |
| <i>DLGAP2</i>        | 8p23.3        | gene | <i>de novo</i> gain                               |
| <i>RB1CC1</i>        | 8q11.23       | gene | rare CNV                                          |
| <i>STK3</i>          | 8q22.2        | gene | translocation breakpoint                          |
| <i>PIP5K1B</i>       | 9q21.11       | gene | translocation breakpoint                          |
| <i>ASTN2</i>         | 9q33.1        | gene | rare CNV                                          |
| <i>GATA3</i>         | 10p14         | gene | <i>de novo</i> deletion                           |
| <i>JMJD1C</i>        | 10q21.2-q21.3 | gene | inversion breakpoint                              |
| <i>REEP3</i>         | 10q21.3       | gene | inversion breakpoint                              |
| <i>KCNMA1</i>        | 10q22.3       | gene | translocation breakpoint                          |
| <i>GRID1</i>         | 10q23.1       | gene | rare CNV                                          |
| <i>SHANK2</i>        | 11q13.3       | gene | paralogue of <i>SHANK3</i>                        |
| <i>HTR3A</i>         | 11q23.1       | gene | association                                       |
| <i>AVPR1A</i>        | 12q14.2       | gene | association                                       |
| <i>TPH2</i>          | 12q21.1       | gene | association                                       |
| <i>GALNT9</i>        | 12q24.33      | gene | <i>de novo</i> deletion                           |
| <i>NBEA</i>          | 13q13.3       | gene | translocation breakpoint, <i>de novo</i> deletion |
| <i>PCDH9</i>         | 13q21.32      | gene | rare CNV                                          |
| <i>MDGA2</i>         | 14q21.3       | gene | rare CNV                                          |
| <i>GABRB3</i>        | 15q12         | gene | association                                       |



| Gene symbol or Locus | Cytoband | Type | Associated condition        |
|----------------------|----------|------|-----------------------------|
| <i>GABRA5</i>        | 15q12    | gene | rare CNV                    |
| <i>NDNL2</i>         | 15q13.1  | gene | rare CNV                    |
| <i>DUOXA1</i>        | 15q21.1  | gene | rare CNV                    |
| <i>A2BP1</i>         | 16p13.3  | gene | <i>de novo</i> deletion     |
| <i>PRKCB</i>         | 16p11.2  | gene | association                 |
| <i>GRIN2A</i>        | 16p13.2  | gene | association                 |
| <i>ANKRD11</i>       | 16q24.3  | gene | <i>de novo</i> deletion     |
| <i>SLC6A4</i>        | 17q11.2  | gene | association                 |
| <i>ITGB3</i>         | 17q21.32 | gene | association                 |
| <i>BZRAP1</i>        | 17q22    | gene | rare CNV                    |
| <i>ANKRD12</i>       | 18p11.22 | gene | paralogue of <i>ANKRD11</i> |
| <i>ZNF676</i>        | 19p12    | gene | rare CNV                    |
| <i>SHANK1</i>        | 19q13.3  | gene | paralogue of <i>SHANK3</i>  |
| <i>PAK7</i>          | 20p12    | gene | rare CNV                    |
| <i>PDE9A</i>         | 21q22.3  | gene | <i>de novo</i> duplication  |
| <i>WDR4</i>          | 21q22.3  | gene | <i>de novo</i> duplication  |
| <i>NDUFV3</i>        | 21q22.3  | gene | <i>de novo</i> duplication  |
| <i>PKNOX1</i>        | 21q22.3  | gene | <i>de novo</i> duplication  |
| <i>GRPR</i>          | Xp22.2   | gene | translocation breakpoint    |
| <i>PTCHD1</i>        | Xp22.11  | gene | <i>de novo</i> deletions    |

We defined three gene-sets based on evidence from previous studies of their involvement in autism spectrum disorders (ASDs): 1) 'ASD implicated' consisting of 36 disease genes and 10 loci (involved in microdeletion/microduplication syndromes) strongly implicated in ASD and identified in subjects with ASD only or ASD and ID; 2) 'ID' consisting of 110 disease genes and 17 loci known to be implicated in ID but not yet in ASD; and 3) 'ASD candidates' including 103 candidate genes drawn from previous ASD studies, including case reports of cytogenetic abnormalities, allelic association and CNV studies.

The genomic coordinates of the loci refer to the UCSC human genome assembly hg18 (NCBI build 36).

Abbreviations: del, deletion; dup, duplication; ID, intellectual disability; MR, mental retardation; XLMR, X-linked mental retardation

**Supplementary Table 10. Clinically-relevant findings**

| Loci       |        |             |     |                     |           |          |                                   |             |                                                                                                                                                                                                                                                                                                                                                                                                                                                                                                              |  |
|------------|--------|-------------|-----|---------------------|-----------|----------|-----------------------------------|-------------|--------------------------------------------------------------------------------------------------------------------------------------------------------------------------------------------------------------------------------------------------------------------------------------------------------------------------------------------------------------------------------------------------------------------------------------------------------------------------------------------------------------|--|
| AGP ID     | Gender | Family type | Chr | Start-end           | Size (bp) | CNV type | Locus                             | Inheritance | Comments                                                                                                                                                                                                                                                                                                                                                                                                                                                                                                     |  |
| 13135_1523 | F      | UKN         | 1   | 144838594-146308287 | 1 469 693 | Gain     | 1q21.1 microduplication           | N/A         | 1q21.1 microdeletions and microduplications have been reported in patients with MR and/or ASD. The phenotype is highly variable, specially for duplications; both deletions and duplications can be inherited from unaffected parents (incomplete penetrance)                                                                                                                                                                                                                                                |  |
| 13050_593  | M      | UKN         | 15  | 21190624-26203954   | 5 013 330 | Gain     | 15q11-13 duplication              | De novo     | Maternally-derived 15q11-13 duplication; this is the most common chromosomal abnormality reported in autism. Many AGP sites screen subjects for chromosomal abnormalities and 15q11-q13 rearrangements (and exclude them if positive), explaining why only one case was identified                                                                                                                                                                                                                           |  |
| 1950_301   | M      | MPX         | 15  | 26762141-30436163   | 3 674 022 | Loss     | 15q13.3 microdeletion syndrome    | Maternal    | 15q13.3 deletions have been described in patients with epilepsy, MR, ASD, bipolar disorder and schizophrenia; they can be inherited from unaffected parents and be present in healthy siblings, with highly variable intra- and inter-familial phenotype. An additional family with 15q13.3 deletion failed the stringent quality control used in this study, but is described elsewhere (PMID: 19050728).                                                                                                   |  |
| 14167_2720 | M      | SPX         | 15  | 28705540-30436163   | 1 730 623 | Loss     | 15q13.3 microdeletion syndrome    | Paternal    |                                                                                                                                                                                                                                                                                                                                                                                                                                                                                                              |  |
| 14283_4060 | M      | UKN         | 16  | 14771033-16307313   | 1 536 280 | Loss     | 16p13.11 microdeletion syndrome   | Maternal    | 16p13.11 deletions have been reported in MR with congenital anomalies, idiopathic generalized epilepsy and schizophrenia; duplications have been reported in MR, ASD and schizophrenia. Both deletions/duplications can be inherited from unaffected parents, and their role as causal or risk factors is not clear at present; duplications appear to be frequent in controls (~0.3%), so they could be rare neutral variants. At present, the clinical significance of 16p13.11 duplications is uncertain. |  |
| 14142_2400 | M      | SPX         | 16  | 15387380-16256106   | 868 726   | Gain     | 16p13.11 microduplication         | Paternal    |                                                                                                                                                                                                                                                                                                                                                                                                                                                                                                              |  |
| 5258_3     | M      | SPX         | 16  | 15387380-16270740   | 883 360   | Gain     | 16p13.11 microduplication         | Paternal    |                                                                                                                                                                                                                                                                                                                                                                                                                                                                                                              |  |
| 5068_3     | F      | MPX         | 16  | 29502984-30127026   | 624 042   | Loss     | 16p11.2 microdeletion syndrome    | De novo     | 16p11.2 deletions and duplications have been reported in patients with autism and MR; both types are associated with incomplete penetrance and variable expressivity, particularly in the case of duplications                                                                                                                                                                                                                                                                                               |  |
| 5359_4     | M      | SPX         | 16  | 29554843-30195224   | 640 381   | Loss     | 16p11.2 microdeletion syndrome    | De novo     |                                                                                                                                                                                                                                                                                                                                                                                                                                                                                                              |  |
| 5262_4     | M      | SPX         | 16  | 29502984-30210849   | 707 865   | Gain     | 16p11.2 microduplication syndrome | De novo     |                                                                                                                                                                                                                                                                                                                                                                                                                                                                                                              |  |
| 3211_003   | M      | SPX         | 16  | 29502984-30127026   | 624 042   | Gain     | 16p11.2 microduplication syndrome | Maternal    |                                                                                                                                                                                                                                                                                                                                                                                                                                                                                                              |  |
| 3183_007   | M      | MPX         | 22  | 17241748-19819918   | 2 578 170 | Loss     | 22q11 deletion syndrome           | De novo     |                                                                                                                                                                                                                                                                                                                                                                                                                                                                                                              |  |
| 3127_004   | M      | MPX         | 22  | 17257787-19793730   | 2 535 943 | Gain     | 22q11 duplication syndrome        | Paternal    | Both 22q11.2 deletions (DiGeorge syndrome) and duplications have been reported in ASD. Incomplete penetrance and variable expressivity of DiGeorge deletions are well known; microduplications are associated with an even higher phenotypic variability and many are inherited from unaffected parents                                                                                                                                                                                                      |  |
| 5261_4     | F      | MPX         | 22  | 17257787-19795780   | 2 537 993 | Gain     | 22q11 duplication syndrome        | Paternal    |                                                                                                                                                                                                                                                                                                                                                                                                                                                                                                              |  |

| Genes      |        |             |     |                     |           |          |           |                 |             |                                                                                                                                                                                                                                                                                                                                                                                                                                                                                                                                                                                                                                                           |
|------------|--------|-------------|-----|---------------------|-----------|----------|-----------|-----------------|-------------|-----------------------------------------------------------------------------------------------------------------------------------------------------------------------------------------------------------------------------------------------------------------------------------------------------------------------------------------------------------------------------------------------------------------------------------------------------------------------------------------------------------------------------------------------------------------------------------------------------------------------------------------------------------|
| AGP ID     | Gender | Family type | Chr | Start-end           | Size (bp) | CNV type | Gene name | Exonic/Intronic | Inheritance | Comments                                                                                                                                                                                                                                                                                                                                                                                                                                                                                                                                                                                                                                                  |
| 13017_223  | F      | UKN         | 2   | 50539877-50730546   | 190 669   | Loss     | NRXN1     | Exonic          | De novo     | All <i>de novo</i> NRXN1 CNVs observed here are exonic, whereas all inherited CNVs in cases as well as CNVs in controls are intronic, suggesting that exonic deletions (and maybe duplications) of NRXN1 could be clinically relevant                                                                                                                                                                                                                                                                                                                                                                                                                     |
| 13153_1703 | M      | UKN         | 2   | 50990306-51222043   | 231 737   | Loss     | NRXN1     | Exonic          | De novo     |                                                                                                                                                                                                                                                                                                                                                                                                                                                                                                                                                                                                                                                           |
| 13037_463  | M      | UKN         | 2   | 51002576-51157742   | 155 166   | Loss     | NRXN1     | Exonic          | De novo     |                                                                                                                                                                                                                                                                                                                                                                                                                                                                                                                                                                                                                                                           |
| 14068_1180 | M      | SPX         | 2   | 50493827-50677835   | 184 008   | Gain     | NRXN1     | Exonic          | De novo     |                                                                                                                                                                                                                                                                                                                                                                                                                                                                                                                                                                                                                                                           |
| 5126_4     | M      | MPX         | X   | 28931559-29478966   | 547 407   | Gain     | IL1RAPL1  | Exonic          | Maternal    | IL1RAPL1 is involved in non syndromic X-linked MR when mutated/deleted; the effects of duplications and intronic deletions are unknown. The duplication is intragenic and is likely to disrupt the gene; the intronic deletion could also be deleterious but further studies are required                                                                                                                                                                                                                                                                                                                                                                 |
| 5036_4     | M      | MPX         | X   | 29446046-29557942   | 111 896   | Loss     | IL1RAPL1  | Intronic        | Maternal    |                                                                                                                                                                                                                                                                                                                                                                                                                                                                                                                                                                                                                                                           |
| 3019_003   | M      | MPX         | X   | 32100618-32315937   | 215 319   | Gain     | DMD       | Exonic          | Maternal    | At least 10% of males with Duchenne and Becker muscular dystrophies have duplications of DMD. ASD has been described in patients with DMD, and about a third have MR. We identified 2 males with exonic duplications inherited from their mothers. Another male proband was found to carry a maternally-inherited exonic deletion but was not included in the counts of CNVs affecting MR genes because the CNV was <30 kb; all 3 CNVs have been validated. When last evaluated, the patients did not exhibit any motor difficulties, but they will be re-evaluated. (Note that patient 5126_4 with the DMD duplication also has an IL1RAPL1 duplication) |
| 5126_4     | M      | MPX         | X   | 32948977-33330592   | 381 615   | Gain     | DMD       | Exonic          | Maternal    |                                                                                                                                                                                                                                                                                                                                                                                                                                                                                                                                                                                                                                                           |
| 5241_3*    | M      | MPX         | X   | 31793278-31822704   | 29 427    | Loss     | DMD       | Exonic          | Maternal    |                                                                                                                                                                                                                                                                                                                                                                                                                                                                                                                                                                                                                                                           |
| 14216_3470 | M      | SPX         | X   | 153263157-153474401 | 211 244   | Gain     | RPL10     | Exonic          | De novo     | 14216_3470 carries a <i>de novo</i> Xq28 duplication affecting 15 genes, including 3 genes involved in ASD/MR, RPL10, GDI1 and IKBKG. RPL10 missense variants were described in 2 ASD subjects; GDI1 is involved in nonsyndromic XLMR while IKBKG is involved in a syndromic form of XLMR, incontinentia pigmenti.                                                                                                                                                                                                                                                                                                                                        |
| 14216_3470 |        |             | X   | 153263157-153474401 | 211 244   | Gain     | GDI1      | Exonic          | De novo     |                                                                                                                                                                                                                                                                                                                                                                                                                                                                                                                                                                                                                                                           |
| 14216_3470 |        |             | X   | 153263157-153474401 | 211 244   | Gain     | IKBKG     | Exonic          | De novo     |                                                                                                                                                                                                                                                                                                                                                                                                                                                                                                                                                                                                                                                           |
| 5353_3     | F      | SPX         | 6   | 33399849-33512042   | 112 193   | Loss     | SYNGAP1   | Exonic          | De novo     | SYNGAP1 was recently shown to be involved in nonsyndromic MR; it had not been implicated in ASD yet.                                                                                                                                                                                                                                                                                                                                                                                                                                                                                                                                                      |
| 5419_3     | M      | SPX         | X   | 41441499-41478503   | 37 004    | Gain     | CASK      | Intronic        | Maternal    | CASK was recently involved in syndromic XLMR with brain malformations or nystagmus. Only sequence mutations have been reported thus far; the consequences of duplications, and in particular of intronic duplications as in this case, are unknown. Re-evaluation of the patient to determine if he has a clinical presentation compatible with CASK mutation is underway.                                                                                                                                                                                                                                                                                |
| 5007_3     | M      | MPX         | X   | 46255974-46292959   | 36 985    | Gain     | ZNF674    | Exonic          | Maternal    | Sequence mutations of ZNF674 cause non syndromic XLMR; the effect of duplications are unknown. A duplication overlapping this gene was also observed in an AGP father with learning difficulties; the possible pathogenic role of these CNVs needs to be further studied                                                                                                                                                                                                                                                                                                                                                                                  |

## Chromosomal abnormalities

| AGP ID     | Gender | Family type | Chr | Start-end               | Size (bp)   | CNV type | Rearrangement                             | Inheritance | Comments                                                                                                                                                                                                                                                                                                                                                                   |
|------------|--------|-------------|-----|-------------------------|-------------|----------|-------------------------------------------|-------------|----------------------------------------------------------------------------------------------------------------------------------------------------------------------------------------------------------------------------------------------------------------------------------------------------------------------------------------------------------------------------|
| 5467_3     | M      | SPX         | 1   | 233476547-247165725     | 13 689 178  | Gain     | 13.5 Mb duplication 1q42.3-q44            | De novo     | Confirmed by qPCR (no karyotype available); the boy has autism and moderate MR, with no obvious dysmorphic features                                                                                                                                                                                                                                                        |
| 14270_3930 | F      | SPX         | 6   | 160773919-170761395     | 9 987 477   | Gain     | 10 Mb duplication 6q25.3-q27 (>100 genes) | De novo     | High resolution karyotype was normal; subtelomere FISH analysis revealed a 6q terminal duplication arising from a paternal balanced translocation, 46,XY, t(6;22)(q25.3;p11.2). The father is healthy. The patient's karyotype is: 46,XX,ish der(22)t(6;22)(6q25.3;p11.2)pat(6qtel+). The girl has nonsyndromic autism and mild MR                                         |
| 13137_1543 | F      | SPX         | 8   | 31,928,590 - 58,996,070 | 27 067 480  | Gain     | 26 Mb duplication 8p12-8q12.1             | De novo     | Mosaic supernumerary ring chromosome (47, XX, +r[10]/46, XX[70]), of unknown origin according to the karyotype, shown to involve chromosome 8 by the SNP array                                                                                                                                                                                                             |
| 5420_3     | M      | UKN         | 21  | 1-247249719             | 247 249 719 | Gain     | 47,XY+21                                  | De novo     | Down's syndrome                                                                                                                                                                                                                                                                                                                                                            |
| 5257_3     | M      | SPX         | Y   | 1-57772954              | 57 772 954  | Gain     | 47,XYY                                    | De novo     | XYY syndrome; both confirmed by karyotyping. There have been several case reports of XYY syndrome in subjects with ASD, and conversely, individuals with XYY appear to be at increased risk for ASD. However, these observations are based on small samples and larger epidemiological studies are required to determine the contribution of an extra Y chromosome to ASD. |
| 5515_3     | M      | UKN         | Y   | 1-57772954              | 57 772 954  | Gain     | 47,XYY                                    | De novo     |                                                                                                                                                                                                                                                                                                                                                                            |

The first 4 abnormalities are considered etiologic and were excluded from the analyses.

## Other likely clinically relevant CNVs (non exhaustive list)

| AGP ID     | Gender | Family type | Chr | Start-end           | Size (bp) | CNV type | Genes    | Inheritance | Comments                                                                                                                                                                                                                             |
|------------|--------|-------------|-----|---------------------|-----------|----------|----------|-------------|--------------------------------------------------------------------------------------------------------------------------------------------------------------------------------------------------------------------------------------|
| 5386_3     | M      | MPX         | 6   | 156785155-158489874 | 1 704 720 | Loss     | 5 genes  | De novo     | 1.7 Mb de novo 6q25.3 deletion                                                                                                                                                                                                       |
| 13123_1403 | F      | UKN         | 9   | 98998-3682923       | 3 583 926 | Loss     | 14 genes | De novo     | 3.5 Mb de novo 9p24.3-9p24.2 deletion                                                                                                                                                                                                |
| 6240_4     | M      | SPX         | 11  | 126633939-132060374 | 5 426 436 | Loss     | 20 genes | De novo     | 5.4 Mb de novo 11q24.2-q25 deletion; Jacobsen syndrome (chromosome 11q deletion syndrome), previously reported in two individuals with ASD                                                                                           |
| 6053_3     | M      | MPX         | 12  | 54218922-58779615   | 4 560 694 | Gain     | 94 genes | De novo     | 4.5 Mb de novo 12q13.3-q14.1 duplication; younger sister with Asperger syndrome does not carry the duplication                                                                                                                       |
| 5444_3     | M      | SPX         | 17  | 76953064-77782267   | 829 204   | Gain     | 40 genes | De novo     | This child has two consecutive de novo CNVs in chromosome 17q25.3, the 829 kb duplication listed here and a smaller deletion, both have their breakpoints within SLC16A3; the deletion also affects CSNK1D (see Table 2, main paper) |
| 6358_6     | M      | SPX         | 19  | 4548413-5287389     | 738 977   | Loss     | 9 genes  | De novo     | 739 kb de novo 19p13.3 deletion                                                                                                                                                                                                      |

## Other CNVs affecting ASD/MR genes not likely to be pathogenic

| AGP ID                                                                                     | Gender | Family type | Chr | Start-end           | Size (bp) | CNV type | Gene name | Exonic/Intronic | Inheritance | Comments                                                                                                                                                                                                                                                                                                                                                                                                                              |
|--------------------------------------------------------------------------------------------|--------|-------------|-----|---------------------|-----------|----------|-----------|-----------------|-------------|---------------------------------------------------------------------------------------------------------------------------------------------------------------------------------------------------------------------------------------------------------------------------------------------------------------------------------------------------------------------------------------------------------------------------------------|
| <b>Duplications without characteristic phenotype and/or inherited from healthy parents</b> |        |             |     |                     |           |          |           |                 |             |                                                                                                                                                                                                                                                                                                                                                                                                                                       |
| 3424_003                                                                                   | M      | SPX         | 2   | 148881443-149078468 | 197 025   | Gain     | MBD5      | Exonic          | Maternal    | Haploinsufficiency of MBD5 (methyl-CpG binding domain protein 5) is responsible for the 2q23.1 microdeletion syndrome; no duplications described thus far. The patient carries a duplication involving the whole gene and does not have any sign similar to those described in the 2q23.1 microdeletion syndrome. This, together with the fact that the duplication is inherited from a healthy mother, suggests it is not pathogenic |
| 1265_8                                                                                     | F      | MPX         | X   | 9931816-10758861    | 827 045   | Gain     | MID1      | Exonic          | Paternal    | MID1 is mutated in Opitz syndrome, an XLMR multiple congenital anomalies syndrome. This duplication was detected in a female proband, who inherited it from her reportedly healthy father, suggesting that it is not pathogenic                                                                                                                                                                                                       |
| 1376_301                                                                                   | M      | MPX         | X   | 76933952-77030430   | 96 478    | Gain     | MAGT1     | Exonic          | Maternal    | MAGT1 (magnesium transporter 1) is an XLMR gene described in 2008; no duplications had been reported. Recurrent duplication were observed in several AGP parents, including a healthy father, suggesting that the duplication of MAGT1 is unlikely to be pathogenic                                                                                                                                                                   |
| 5036_4                                                                                     | M      | MPX         | X   | 148075334-148617551 | 542 217   | Gain     | IDS       | Exonic          | Maternal    | Mucopolysaccharidosis type II (Hunter syndrome); XLMR. Effect of duplication unknown. The patient does not have any of the clinical features commonly observed in Hunter syndrome (coarse facies, macrocephaly, short stature, hepatosplenomegaly, joint contractures) and urine mucopolysaccharides were normal, suggesting that whole gene duplications of IDS are not deleterious                                                  |

## Autosomal recessive genes

|            |   |     |    |                     |           |      |        |          |          |                                                                                          |
|------------|---|-----|----|---------------------|-----------|------|--------|----------|----------|------------------------------------------------------------------------------------------|
| 5267_3     | M | UKN | 3  | 3098326-3184518     | 86 192    | Loss | CRBN   | Exonic   | Paternal | mutations in CRBN cause autosomal recessive nonsyndromic MR                              |
| 14061_1040 | M | SPX | 4  | 119424168-119702863 | 278 695   | Gain | PRSS12 | Exonic   | Maternal | mutations in PRSS12 cause autosomal recessive nonsyndromic MR                            |
| 13072_853  | M | UKN | 8  | 6428786-6552017     | 123 231   | Loss | MCPH1  | Exonic   | N/A      | mutations in MCPH1 cause autosomal recessive microcephaly and MR                         |
| 5323_3     | M | UKN | 8  | 15446378-15476553   | 30 175    | Loss | TUSC3  | Intronic | Paternal | mutations in TUSC3 cause autosomal recessive nonsyndromic MR                             |
| 5378_3     | M | MPX | 8  | 100610705-100707665 | 96 960    | Loss | VPS13B | Exonic   | Paternal | mutations in VPS13B cause Cohen syndrome                                                 |
| 13123_1403 | F | UKN | 9  | 98998-3682923       | 3 583 925 | Loss | VLDLR  | Exonic   | De novo  | mutations in VLDLR cause autosomal recessive cerebellar hypoplasia and MR                |
| 14219_3520 | M | SPX | 11 | 77245396-77562430   | 317 034   | Gain | ALG8   | Exonic   | Paternal | mutations in ALG8 cause autosomal recessive congenital disorder of glycosylation type Ii |

| AGP ID                                                | Gender | Family type | Chr | Start-end           | Size (bp) | CNV type | Gene name | Exonic/Intronic | Inheritance | Comments                                         |
|-------------------------------------------------------|--------|-------------|-----|---------------------|-----------|----------|-----------|-----------------|-------------|--------------------------------------------------|
| <b>Autosomal recessive genes</b> ( <i>continued</i> ) |        |             |     |                     |           |          |           |                 |             |                                                  |
| 3145_003                                              | M      | MPX         | 2   | 110198845-110583308 | 384 463   | Loss     | NPHP1     | Exonic          | Maternal    | mutations in NPHP1 cause Joubert syndrome type 4 |
| 5112_4                                                | M      | MPX         | 2   | 110198845-110340339 | 141 494   | Loss     | NPHP1     | Exonic          | Maternal    |                                                  |
| 3049_003                                              | F      | MPX         | 2   | 110206673-110615080 | 408 407   | Loss     | NPHP1     | Exonic          | Paternal    |                                                  |
| 3181_007                                              | M      | MPX         | 2   | 110206673-110615080 | 408 407   | Loss     | NPHP1     | Exonic          | N/A         |                                                  |
| 3266_003                                              | M      | MPX         | 2   | 110206673-110615080 | 408 407   | Loss     | NPHP1     | Exonic          | Maternal    |                                                  |
| 14064_1110                                            | M      | SPX         | 2   | 110210164-110615080 | 404 916   | Loss     | NPHP1     | Exonic          | N/A         |                                                  |
| 6279_3                                                | M      | UKN         | 2   | 110210164-110340339 | 130 175   | Loss     | NPHP1     | Exonic          | Paternal    |                                                  |

\* The CNV in proband 5241\_3 did not meet the criteria for inclusion in the analyses of CNVs overlapping ASD/MR genes (<30 kb)

Abbreviations: ASD, autism spectrum disorder; F, female; M, male; MR, mental retardation; MPX, multiplex ASD family (two or more first-third degree relatives affected with ASD); N/A, not available; SPX, simplex ASD family (no first-third degree relatives with ASD); UKN, unknown family type (extended family not evaluated); XLMR, X-linked mental retardation

## Supplementary Table 11. Population attributable risk (PAR)

## A. Counts

|                 | Candidates |             | ASD-implicated |             | ID-implicated only |             | ASD- & ID-implicated |             |
|-----------------|------------|-------------|----------------|-------------|--------------------|-------------|----------------------|-------------|
|                 | Exposed    | Not Exposed | Exposed        | Not Exposed | Exposed            | Not Exposed | Exposed              | Not Exposed |
| <b>Cases</b>    | 78         | 918         | 43             | 953         | 36                 | 960         | 76                   | 920         |
| <b>Controls</b> | 94         | 1,193       | 30             | 1,257       | 30                 | 1,257       | 58                   | 1,229       |

## B. PAR Estimation

|                                 | P(A)  | R    | P(A)(R-1) | PAR   |
|---------------------------------|-------|------|-----------|-------|
| <b>ASD Candidates</b>           | 0.073 | 1.08 | 0.006     | 0.60% |
| <b>ASD-implicated</b>           | 0.023 | 1.89 | 0.02      | 2.00% |
| <b>ID-implicated</b>            | 0.023 | 1.57 | 0.013     | 1.30% |
| <b>ASD- &amp; ID implicated</b> | 0.045 | 1.75 | 0.034     | 3.30% |

PAR =  $P(A) \cdot (R-1) / [1 + P(A) \cdot (R-1)]$  (i.e., the % of cases that can be attributed to rare CNV);  
P(A) = exposure to selected rare CNVs, which was estimated from the frequency in controls;  
R = the relative risk for ASD, which was estimated from the odds ratio.

**Supplementary Table 12. Number of analyzed gene-sets in the functional map enriched for deletions**

|               | Number of gene-sets |                       |                                 |                                            |
|---------------|---------------------|-----------------------|---------------------------------|--------------------------------------------|
|               | All                 | Filtered <sup>1</sup> | Tested (deletions) <sup>2</sup> | Enriched for deletions in ASD <sup>3</sup> |
| Gene Ontology | 10,438              | 4,684                 | 2,696                           | 67                                         |
| KEGG          | 205                 | 194                   | 152                             | 5                                          |
| NCI           | 162                 | 151                   | 115                             | -                                          |
| Reactome      | 89                  | 65                    | 59                              | -                                          |
| PFAM          | 3,539               | 1,035                 | 471                             | 4                                          |
| Total         | 14,433              | 6,129 <sup>2</sup>    | 3,493                           | 76                                         |

<sup>1</sup> Gene-sets with less than 5 genes and larger than 700 genes were excluded from the analyses.

<sup>2</sup> Filtered gene-sets whose genes were never overlapped by a CNV were not tested for enrichment. Of the 6,129 filtered genes, 3,493 genes had deletion counts >0 for either cases or controls, and were therefore used in the enrichment test and q-value estimation.

<sup>3</sup> Gene-sets enriched in ASD compared to controls with q-value <12.5%. 76/3,493 (2.18%) gene-sets were found to be enriched for deletions.

**Supplementary Table 13. List of gene-sets enriched for deletions**

Data provided separately, as an Excel workbook file.

## H. ACKNOWLEDGEMENTS

We wish to acknowledge SAGE as part of this study:

Funding support for the Study of Addiction: Genetics and Environment (SAGE) was provided through the NIH Genes, Environment and Health Initiative [GEI] (U01 HG004422). SAGE is one of the genome-wide association studies funded as part of the Gene Environment Association Studies (GENEVA) under GEI. Assistance with phenotype harmonization and genotype cleaning, as well as with general study coordination, was provided by the GENEVA Coordinating Center (U01 HG004446). Assistance with data cleaning was provided by the National Center for Biotechnology Information. Support for collection of datasets and samples was provided by the Collaborative Study on the Genetics of Alcoholism (COGA; U10 AA008401), the Collaborative Genetic Study of Nicotine Dependence (COGEND; P01 CA089392), and the Family Study of Cocaine Dependence (FSCD; R01 DA013423). Funding support for genotyping, which was performed at the Johns Hopkins University Center for Inherited Disease Research, was provided by the NIH GEI (U01 HG004438), the National Institute on Alcohol Abuse and Alcoholism, the National Institute on Drug Abuse, and the NIH contract "High throughput genotyping for studying the genetic contributions to human disease" (HHSN268200782096C).



## I. SUPPLEMENTARY REFERENCES

- 1 Szatmari, P. *et al.*, Mapping autism risk loci using genetic linkage and chromosomal rearrangements. *Nat Genet* 39 (3), 319-328 (2007).
- 2 Lord, C., Rutter, M., & Le Couteur, A., Autism Diagnostic Interview-Revised: a revised version of a diagnostic interview for caregivers of individuals with possible pervasive developmental disorders. *J Autism Dev Disord* 24 (5), 659-685 (1994).
- 3 Lord, C. *et al.*, The autism diagnostic observation schedule-generic: a standard measure of social and communication deficits associated with the spectrum of autism. *J Autism Dev Disord* 30 (3), 205-223 (2000).
- 4 Risi, S. *et al.*, Combining information from multiple sources in the diagnosis of autism spectrum disorders. *J Am Acad Child Adolesc Psychiatry* 45 (9), 1094-1103 (2006).
- 5 Bierut, L.J. *et al.*, A genome-wide association study of alcohol dependence. *Proc Natl Acad Sci U S A* [Epub ahead of print] (2010).
- 6 Stewart, A.F. *et al.*, Kinesin family member 6 variant Trp719Arg does not associate with angiographically defined coronary artery disease in the Ottawa Heart Genomics Study. *J Am Coll Cardiol* 53 (16), 1471-1472 (2009).
- 7 Korn, J.M. *et al.*, Integrated genotype calling and association analysis of SNPs, common copy number polymorphisms and rare CNVs. *Nat Genet* 40 (10), 1253-1260 (2008).
- 8 Zhang, J. *et al.*, iPattern: a cross-sample copy number variation discovery method for multiple array platforms. *Submitted* (2010).
- 9 Krawczak, M. *et al.*, PopGen: population-based recruitment of patients and controls for the analysis of complex genotype-phenotype relationships. *Community Genet* 9 (1), 55-61 (2006).
- 10 Shaikh, T.H. *et al.*, High-resolution mapping and analysis of copy number variations in the human genome: a data resource for clinical and research applications. *Genome Res* 19 (9), 1682-1690 (2009).
- 11 Peiffer, D.A. *et al.*, High-resolution genomic profiling of chromosomal aberrations using Infinium whole-genome genotyping. *Genome Res* 16 (9), 1136-1148 (2006).
- 12 Anney, R. *et al.*, A genome-wide scan for common variants affecting risk for autism. *Submitted* (2010).
- 13 Lee, A.B., Luca, D., Klei, L., Devlin, B., & Roeder, K., Discovering genetic ancestry using spectral graph theory. *Genet Epidemiol* 34 (1), 51-59 (2010).
- 14 Colella, S. *et al.*, QuantiSNP: an Objective Bayes Hidden-Markov Model to detect and accurately map copy number variation using SNP genotyping data. *Nucleic Acids Res* 35 (6), 2013-2025 (2007).
- 15 Wang, K. *et al.*, PennCNV: an integrated hidden Markov model designed for high-resolution copy number variation detection in whole-genome SNP genotyping data. *Genome Res* 17 (11), 1665-1674 (2007).
- 16 Redon, R. *et al.*, Global variation in copy number in the human genome. *Nature* 444 (7118), 444-454 (2006).
- 17 Pinto, D., Marshall, C., Feuk, L., & Scherer, S.W., Copy-number variation in control population cohorts. *Hum Mol Genet* 16 Spec No. 2, R168-173 (2007).
- 18 Conrad, D.F. *et al.*, Origins and functional impact of copy number variation in the human genome. *Nature*, [Epub ahead of print] (2009).
- 19 The Wellcome Trust Case Control Consortium, Genome-wide association study of copy number variation in 16,000 cases of eight common diseases and 3,000 shared controls. *Nature Accepted* (2010).
- 20 Hellemans, J., Mortier, G., De Paepe, A., Speleman, F., & Vandesompele, J., qBase relative quantification framework and software for management and automated analysis of real-time quantitative PCR data. *Genome Biol* 8 (2), R19 (2007).

- 21 Marshall, C.R. *et al.*, Structural variation of chromosomes in autism spectrum disorder. *Am J Hum Genet* 82 (2), 477-488 (2008).
- 22 Glessner, J.T. *et al.*, Autism genome-wide copy number variation reveals ubiquitin and neuronal genes. *Nature* 459 (7246), 569-573 (2009).
- 23 Bucan, M. *et al.*, Genome-wide analyses of exonic copy number variants in a family-based study point to novel autism susceptibility genes. *PLoS Genet* 5 (6), e1000536 (2009).
- 24 Weiss, L.A. *et al.*, Association between microdeletion and microduplication at 16p11.2 and autism. *N Engl J Med* 358 (7), 667-675 (2008).
- 25 Purcell, S. *et al.*, PLINK: a tool set for whole-genome association and population-based linkage analyses. *Am J Hum Genet* 81 (3), 559-575 (2007).
- 26 Piton, A. *et al.*, Mutations in the calcium-related gene IL1RAPL1 are associated with autism. *Hum Mol Genet* 17 (24), 3965-3974 (2008).
- 27 Hendriksen, J.G. & Vles, J.S., Neuropsychiatric disorders in males with duchenne muscular dystrophy: frequency rate of attention-deficit hyperactivity disorder (ADHD), autism spectrum disorder, and obsessive-compulsive disorder. *J Child Neurol* 23 (5), 477-481 (2008).
- 28 Betancur, C., Sakurai, T., & Buxbaum, J.D., The emerging role of synaptic cell-adhesion pathways in the pathogenesis of autism spectrum disorders. *Trends Neurosci* 32 (7), 402-412 (2009).
- 29 Subramanian, A. *et al.*, Gene set enrichment analysis: a knowledge-based approach for interpreting genome-wide expression profiles. *Proc Natl Acad Sci U S A* 102 (43), 15545-15550 (2005).
- 30 Benjamini, Y. & Hochberg, Y., Controlling the False Discovery Rate: A Practical and Powerful Approach to Multiple Testing. *Journal of the Royal Statistical Society. Series B (Methodological)* 51 (1), 289-300 (1995).
- 31 Storey, J.D. & Tibshirani, R., Statistical significance for genomewide studies. *Proc Natl Acad Sci U S A* 100 (16), 9440-9445 (2003).
- 32 Storey, J.D., The positive false discovery rate: a Bayesian interpretation and the q-value. *Annals of Statistics* 31 (6), 2013-2035 (2003).
- 33 Dinu, I. *et al.*, Gene-set analysis and reduction. *Brief Bioinform* 10 (1), 24-34 (2009).
- 34 Cline, M.S. *et al.*, Integration of biological networks and gene expression data using Cytoscape. *Nat Protoc* 2 (10), 2366-2382 (2007).
- 35 Isserlin, R. *et al.*, Pathway analysis of dilated cardiomyopathy using global proteomic profiling and enrichment maps. *Proteomics* [Epub ahead of print] (2010).
- 36 Merico, D., Isserlin, R., Stueker, O., Emili, A., & Bader, G.D., Enrichment Map: a network-based method for gene-set enrichment visualization and interpretation. *Submitted* (2010).
- 37 Merico, D., Gfeller, D., & Bader, G.D., How to visually interpret biological data using networks. *Nat Biotechnol* 27 (10), 921-924 (2009).
- 38 Grossmann, S., Bauer, S., Robinson, P.N., & Vingron, M., Improved detection of overrepresentation of Gene-Ontology annotations with parent child analysis. *Bioinformatics* 23 (22), 3024-3031 (2007).
- 39 Falcon, S. & Gentleman, R., Using GOstats to test gene lists for GO term association. *Bioinformatics* 23 (2), 257-258 (2007).
- 40 Newey, S.E., Velamoor, V., Govek, E.E., & Van Aelst, L., Rho GTPases, dendritic structure, and mental retardation. *J Neurobiol* 64 (1), 58-74 (2005).
- 41 Conrad, D.F. *et al.*, Origins and functional impact of copy number variation in the human genome. *Nature* 464 (7289), 704-712 (2010).
- 42 lafrate, A.J. *et al.*, Detection of large-scale variation in the human genome. *Nat Genet* 36 (9), 949-951 (2004).
